# Supplementary material for: Signaling of Pigment-Dispersing Factor (PDF) in the Madeira Cockroach Rhyparobia maderae
Source: PLoS One. 2014 Sep 30;9(9):e108757. doi: 10.1371/journal.pone.0108757 (PMC4182629; doi:10.1371/journal.pone.0108757)
Supplement: Table S1 — The responses of calcium baseline and frequency changes of type 1 cells corresponding to the 4 different PDF concentrations (100 nM; 250 nM; 500 nM; 1 µM). Normalized frequency or normalized baseline was determined as percentage of frequency (or baseline) changes within 3 min after stimulus application. Gaussian fits for the distribution of normalized frequency or normalized baseline were shown. (XLSX) [file pone.0108757.s002.xlsx]

## Sheet: BaselineFrequency-info.
		100nM PDF application						250nM PDF application						500nM PDF application						1µM PDF application
		normalized baseline	normalized frequency	baseline distribution		frequency distribution		normalized baseline	normalized frequency	baseline distribution		frequency distribution		normalized baseline	normalized frequency	baseline distribution		frequency distribution		normalized baseline	normalized frequency	baseline distribution		frequency distribution
		0.784615	1	0	0.588343	0	0.5467	0.288	0.8	0	0.28226	0	0.166814	0.76	1	0	0.106273	0	0.0447439	1.08182	0.636364	0	0.0181699	0	0.135877
		0.434783	0.2	0.0002	0.58897	0.0002	0.547186	0.453846	0.111111	0.0002	0.282578	0.0002	0.166967	0.723077	0.166667	0.0002	0.10633	0.0002	0.0447858	1.67213	2.71429	0.0002	0.0181842	0.0002	0.135934
		0.00909091	0.111111	0.0004	0.589597	0.0004	0.547673	0.294118	0.8	0.0004	0.282895	0.0004	0.16712	0.654902	1.2	0.0004	0.106387	0.0004	0.0448279	2.47692	1.5	0.0004	0.0181985	0.0004	0.135991
		0.0944882	0.2	0.0006	0.590225	0.0006	0.548159	1.22857	0.875	0.0006	0.283213	0.0006	0.167273	2.82857	1.75	0.0006	0.106443	0.0006	0.0448699	1.77174	1.2	0.0006	0.0182129	0.0006	0.136048
		0	0.125	0.0008	0.590852	0.0008	0.548646	0.270588	2	0.0008	0.283531	0.0008	0.167426	0.776471	2.25	0.0008	0.1065	0.0008	0.044912	2.62727	0.777778	0.0008	0.0182273	0.0008	0.136104
		0.398907	0.5	0.001	0.59148	0.001	0.549132	0.00735294	0	0.001	0.283849	0.001	0.16758	0.588235	0.4	0.001	0.106557	0.001	0.0449541	1.0315	0.8	0.001	0.0182416	0.001	0.136161
		0.45	0.714286	0.0012	0.592109	0.0012	0.549619	0.2	1	0.0012	0.284168	0.0012	0.167733	1.1	1.44444	0.0012	0.106614	0.0012	0.0449963			0.0012	0.018256	0.0012	0.136218
		0.361702	0.125	0.0014	0.592737	0.0014	0.550107	0.7	0.714286	0.0014	0.284487	0.0014	0.167887	1.15	1.28571	0.0014	0.106671	0.0014	0.0450385			0.0014	0.0182704	0.0014	0.136275
		0.625	0.714286	0.0016	0.593367	0.0016	0.550594	0.545455	0.454545	0.0016	0.284806	0.0016	0.16804	1.29091	1	0.0016	0.106728	0.0016	0.0450807			0.0016	0.0182848	0.0016	0.136332
		0.482353	0.272727	0.0018	0.593996	0.0018	0.551081	0.418182	0.363636	0.0018	0.285125	0.0018	0.168194	0.727273	0.636364	0.0018	0.106784	0.0018	0.0451229			0.0018	0.0182992	0.0018	0.136388
		0.227273	0.0833333	0.002	0.594626	0.002	0.551569	0.429907	0.625	0.002	0.285444	0.002	0.168348	0.766355	1.25	0.002	0.106841	0.002	0.0451652			0.002	0.0183136	0.002	0.136445
		0.444444	0.5	0.0022	0.595255	0.0022	0.552057	0.862069	0.5	0.0022	0.285764	0.0022	0.168501	1.91379	1	0.0022	0.106898	0.0022	0.0452075			0.0022	0.0183281	0.0022	0.136502
		0.745455	0.75	0.0024	0.595886	0.0024	0.552545	0.54918	0.857143	0.0024	0.286084	0.0024	0.168655	0.901639	2.14286	0.0024	0.106955	0.0024	0.0452499			0.0024	0.0183425	0.0024	0.136559
		0.03125	0.333333	0.0026	0.596516	0.0026	0.553034	0.827273	0.666667	0.0026	0.286404	0.0026	0.168809	1.86154	1.125	0.0026	0.107012	0.0026	0.0452923			0.0026	0.018357	0.0026	0.136616
				0.0028	0.597147	0.0028	0.553522	0.191176	0.875	0.0028	0.286725	0.0028	0.168964	1.44565	0.9	0.0028	0.107069	0.0028	0.0453347			0.0028	0.0183714	0.0028	0.136673
				0.003	0.597778	0.003	0.554011	0.89071	1.1	0.003	0.287045	0.003	0.169118	2.04545	1.33333	0.003	0.107126	0.003	0.0453771			0.003	0.0183859	0.003	0.13673
				0.0032	0.59841	0.0032	0.5545	0.85	1.14286	0.0032	0.287366	0.0032	0.169272	0.80315	0.8	0.0032	0.107183	0.0032	0.0454196			0.0032	0.0184004	0.0032	0.136787
				0.0034	0.599042	0.0034	0.554989	0.48227	1	0.0034	0.287688	0.0034	0.169427	0.779412	1.25	0.0034	0.10724	0.0034	0.0454621			0.0034	0.0184149	0.0034	0.136844
				0.0036	0.599674	0.0036	0.555478	0.928571	1.28571	0.0036	0.288009	0.0036	0.169581	2.0929	1.6	0.0036	0.107297	0.0036	0.0455047			0.0036	0.0184294	0.0036	0.136901
				0.0038	0.600307	0.0038	0.555967	0.623529	0.636364	0.0038	0.288331	0.0038	0.169736	1.15	1.57143	0.0038	0.107354	0.0038	0.0455472			0.0038	0.0184439	0.0038	0.136958
				0.004	0.600939	0.004	0.556457	0.659091	0.583333	0.004	0.288652	0.004	0.169891	0.957447	1.5	0.004	0.107411	0.004	0.0455899			0.004	0.0184584	0.004	0.137015
				0.0042	0.601572	0.0042	0.556947	0.733333	0.75	0.0042	0.288975	0.0042	0.170046	1.21429	1.57143	0.0042	0.107469	0.0042	0.0456325			0.0042	0.0184729	0.0042	0.137072
				0.0044	0.602206	0.0044	0.557437	0.927273	1	0.0044	0.289297	0.0044	0.170201	2.94118	0.818182	0.0044	0.107526	0.0044	0.0456752			0.0044	0.0184874	0.0044	0.137129
				0.0046	0.60284	0.0046	0.557927	0.398438	0.5	0.0046	0.28962	0.0046	0.170356	0.806818	0.916667	0.0046	0.107583	0.0046	0.0457179			0.0046	0.018502	0.0046	0.137186
				0.0048	0.603474	0.0048	0.558417	0.12	0.0909091	0.0048	0.289942	0.0048	0.170511	1.84444	1.375	0.0048	0.10764	0.0048	0.0457606			0.0048	0.0185166	0.0048	0.137243
				0.005	0.604108	0.005	0.558908	0.0571429	0.833333	0.005	0.290265	0.005	0.170666	2.58182	1.5	0.005	0.107697	0.005	0.0458034			0.005	0.0185311	0.005	0.1373
				0.0052	0.604743	0.0052	0.559398	0.651613	1.14286	0.0052	0.290589	0.0052	0.170822	1.07812	0.583333	0.0052	0.107755	0.0052	0.0458462			0.0052	0.0185457	0.0052	0.137357
				0.0054	0.605377	0.0054	0.559889			0.0054	0.290912	0.0054	0.170977	1.24	0.636364	0.0054	0.107812	0.0054	0.0458891			0.0054	0.0185603	0.0054	0.137414
				0.0056	0.606013	0.0056	0.56038			0.0056	0.291236	0.0056	0.171133	0.485714	2.16667	0.0056	0.107869	0.0056	0.0459319			0.0056	0.0185749	0.0056	0.137471
				0.0058	0.606648	0.0058	0.560871			0.0058	0.29156	0.0058	0.171288	0.451613	1.57143	0.0058	0.107926	0.0058	0.0459748			0.0058	0.0185895	0.0058	0.137529
				0.006	0.607284	0.006	0.561363			0.006	0.291884	0.006	0.171444			0.006	0.107984	0.006	0.0460178			0.006	0.0186041	0.006	0.137586
				0.0062	0.60792	0.0062	0.561854			0.0062	0.292209	0.0062	0.1716			0.0062	0.108041	0.0062	0.0460608			0.0062	0.0186187	0.0062	0.137643
				0.0064	0.608557	0.0064	0.562346			0.0064	0.292534	0.0064	0.171756			0.0064	0.108098	0.0064	0.0461038			0.0064	0.0186334	0.0064	0.1377
				0.0066	0.609194	0.0066	0.562838			0.0066	0.292859	0.0066	0.171912			0.0066	0.108156	0.0066	0.0461468			0.0066	0.018648	0.0066	0.137757
				0.0068	0.609831	0.0068	0.56333			0.0068	0.293184	0.0068	0.172068			0.0068	0.108213	0.0068	0.0461899			0.0068	0.0186627	0.0068	0.137815
		mean	mean	0.007	0.610468	0.007	0.563823	mean	mean	0.007	0.293509	0.007	0.172225	mean	mean	0.007	0.108271	0.007	0.046233	mean	mean	0.007	0.0186773	0.007	0.137872
		0.363526	0.402077	0.0072	0.611106	0.0072	0.564315	0.540285	0.766954	0.0072	0.293835	0.0072	0.172381	1.26536	1.22483	0.0072	0.108328	0.0072	0.0462761	1.7769	1.2714	0.0072	0.018692	0.0072	0.137929
		standard deviation	standard deviation	0.0074	0.611744	0.0074	0.564808	standard deviation	standard deviation	0.0074	0.294161	0.0074	0.172538	standard deviation	standard deviation	0.0074	0.108386	0.0074	0.0463193	standard deviation	standard deviation	0.0074	0.0187067	0.0074	0.137986
		0.260939	0.295559	0.0076	0.612382	0.0076	0.565301	0.307721	0.408857	0.0076	0.294487	0.0076	0.172694	0.690588	0.505468	0.0076	0.108443	0.0076	0.0463625	0.672746	0.775684	0.0076	0.0187214	0.0076	0.138044
				0.0078	0.613021	0.0078	0.565794			0.0078	0.294813	0.0078	0.172851			0.0078	0.108501	0.0078	0.0464057			0.0078	0.0187361	0.0078	0.138101
				0.008	0.61366	0.008	0.566287			0.008	0.29514	0.008	0.173008			0.008	0.108558	0.008	0.046449			0.008	0.0187508	0.008	0.138158
		bin center	bin center	0.0082	0.614299	0.0082	0.56678	bin center	bin center	0.0082	0.295467	0.0082	0.173165	bin center	bin center	0.0082	0.108616	0.0082	0.0464923	bin center	bin center	0.0082	0.0187655	0.0082	0.138215
		0.1	0.1	0.0084	0.614939	0.0084	0.567274	0.1	0.25	0.0084	0.295794	0.0084	0.173322	0.25	0.25	0.0084	0.108673	0.0084	0.0465356	1.25	0.75	0.0084	0.0187803	0.0084	0.138273
		0.3	0.3	0.0086	0.615578	0.0086	0.567767	0.3	0.75	0.0086	0.296122	0.0086	0.173479	0.75	0.75	0.0086	0.108731	0.0086	0.046579	1.75	1.25	0.0086	0.018795	0.0086	0.13833
		0.5	0.5	0.0088	0.616219	0.0088	0.568261	0.5	1.25	0.0088	0.296449	0.0088	0.173636	1.25	1.25	0.0088	0.108789	0.0088	0.0466224	2.25	1.75	0.0088	0.0188098	0.0088	0.138388
		0.7	0.7	0.009	0.616859	0.009	0.568756	0.7	1.75	0.009	0.296777	0.009	0.173793	1.75	1.75	0.009	0.108846	0.009	0.0466659	2.75	2.25	0.009	0.0188245	0.009	0.138445
			0.9	0.0092	0.6175	0.0092	0.56925	0.9	2.25	0.0092	0.297105	0.0092	0.173951	2.25	2.25	0.0092	0.108904	0.0092	0.0467093		2.75	0.0092	0.0188393	0.0092	0.138502
			1.1	0.0094	0.618141	0.0094	0.569744	1.1		0.0094	0.297433	0.0094	0.174108	2.75		0.0094	0.108962	0.0094	0.0467528			0.0094	0.0188541	0.0094	0.13856
				0.0096	0.618782	0.0096	0.570239	1.3		0.0096	0.297762	0.0096	0.174266			0.0096	0.109019	0.0096	0.0467964			0.0096	0.0188689	0.0096	0.138617
				0.0098	0.619424	0.0098	0.570734			0.0098	0.298091	0.0098	0.174423			0.0098	0.109077	0.0098	0.0468399			0.0098	0.0188837	0.0098	0.138675
		count	count	0.01	0.620066	0.01	0.571229	count	count	0.01	0.29842	0.01	0.174581	count	count	0.01	0.109135	0.01	0.0468836	count	count	0.01	0.0188985	0.01	0.138732
		4	4	0.0102	0.620708	0.0102	0.571724	4	5	0.0102	0.298749	0.0102	0.174739	2	2	0.0102	0.109193	0.0102	0.0469272	2	3	0.0102	0.0189133	0.0102	0.13879
		3	3	0.0104	0.62135	0.0104	0.572219	5	14	0.0104	0.299079	0.0104	0.174897	12	7	0.0104	0.10925	0.0104	0.0469709	2	1	0.0104	0.0189282	0.0104	0.138847
		4	3	0.0106	0.621993	0.0106	0.572715	6	7	0.0106	0.299408	0.0106	0.175055	8	11	0.0106	0.109308	0.0106	0.0470146	1	1	0.0106	0.018943	0.0106	0.138905
		3	3	0.0108	0.622636	0.0108	0.57321	5	0	0.0108	0.299738	0.0108	0.175213	3	7	0.0108	0.109366	0.0108	0.0470583	1	0	0.0108	0.0189579	0.0108	0.138962
			0	0.011	0.62328	0.011	0.573706	6	1	0.011	0.300069	0.011	0.175372	2	3	0.011	0.109424	0.011	0.0471021		1	0.011	0.0189727	0.011	0.13902
			1	0.0112	0.623923	0.0112	0.574202	0		0.0112	0.300399	0.0112	0.17553	3		0.0112	0.109482	0.0112	0.0471459			0.0112	0.0189876	0.0112	0.139077
				0.0114	0.624567	0.0114	0.574698	1		0.0114	0.30073	0.0114	0.175689			0.0114	0.10954	0.0114	0.0471897			0.0114	0.0190025	0.0114	0.139135
				0.0116	0.625212	0.0116	0.575195			0.0116	0.301061	0.0116	0.175847			0.0116	0.109598	0.0116	0.0472336			0.0116	0.0190174	0.0116	0.139192
				0.0118	0.625856	0.0118	0.575691			0.0118	0.301392	0.0118	0.176006			0.0118	0.109656	0.0118	0.0472775			0.0118	0.0190323	0.0118	0.13925
				0.012	0.626501	0.012	0.576188			0.012	0.301723	0.012	0.176165			0.012	0.109714	0.012	0.0473214			0.012	0.0190472	0.012	0.139307
				0.0122	0.627146	0.0122	0.576685			0.0122	0.302055	0.0122	0.176324			0.0122	0.109771	0.0122	0.0473654			0.0122	0.0190621	0.0122	0.139365
				0.0124	0.627792	0.0124	0.577182			0.0124	0.302387	0.0124	0.176483			0.0124	0.10983	0.0124	0.0474094			0.0124	0.019077	0.0124	0.139423
				0.0126	0.628438	0.0126	0.577679			0.0126	0.302719	0.0126	0.176642			0.0126	0.109888	0.0126	0.0474534			0.0126	0.019092	0.0126	0.13948
				0.0128	0.629084	0.0128	0.578177			0.0128	0.303051	0.0128	0.176801			0.0128	0.109946	0.0128	0.0474975			0.0128	0.0191069	0.0128	0.139538
				0.013	0.62973	0.013	0.578674			0.013	0.303384	0.013	0.17696			0.013	0.110004	0.013	0.0475416			0.013	0.0191219	0.013	0.139596
				0.0132	0.630377	0.0132	0.579172			0.0132	0.303717	0.0132	0.17712			0.0132	0.110062	0.0132	0.0475858			0.0132	0.0191369	0.0132	0.139653
				0.0134	0.631024	0.0134	0.57967			0.0134	0.30405	0.0134	0.177279			0.0134	0.11012	0.0134	0.0476299			0.0134	0.0191519	0.0134	0.139711
				0.0136	0.631671	0.0136	0.580168			0.0136	0.304383	0.0136	0.177439			0.0136	0.110178	0.0136	0.0476742			0.0136	0.0191669	0.0136	0.139769
				0.0138	0.632318	0.0138	0.580666			0.0138	0.304717	0.0138	0.177599			0.0138	0.110236	0.0138	0.0477184			0.0138	0.0191819	0.0138	0.139826
				0.014	0.632966	0.014	0.581165			0.014	0.305051	0.014	0.177759			0.014	0.110294	0.014	0.0477627			0.014	0.0191969	0.014	0.139884
				0.0142	0.633614	0.0142	0.581663			0.0142	0.305385	0.0142	0.177919			0.0142	0.110353	0.0142	0.047807			0.0142	0.0192119	0.0142	0.139942
				0.0144	0.634263	0.0144	0.582162			0.0144	0.305719	0.0144	0.178079			0.0144	0.110411	0.0144	0.0478513			0.0144	0.0192269	0.0144	0.14
				0.0146	0.634911	0.0146	0.582661			0.0146	0.306054	0.0146	0.178239			0.0146	0.110469	0.0146	0.0478957			0.0146	0.019242	0.0146	0.140058
				0.0148	0.63556	0.0148	0.58316			0.0148	0.306388	0.0148	0.178399			0.0148	0.110527	0.0148	0.0479401			0.0148	0.019257	0.0148	0.140115
				0.015	0.63621	0.015	0.583659			0.015	0.306723	0.015	0.178559			0.015	0.110586	0.015	0.0479846			0.015	0.0192721	0.015	0.140173
				0.0152	0.636859	0.0152	0.584159			0.0152	0.307059	0.0152	0.17872			0.0152	0.110644	0.0152	0.048029			0.0152	0.0192872	0.0152	0.140231
				0.0154	0.637509	0.0154	0.584658			0.0154	0.307394	0.0154	0.17888			0.0154	0.110702	0.0154	0.0480735			0.0154	0.0193023	0.0154	0.140289
				0.0156	0.638159	0.0156	0.585158			0.0156	0.30773	0.0156	0.179041			0.0156	0.110761	0.0156	0.0481181			0.0156	0.0193173	0.0156	0.140347
				0.0158	0.638809	0.0158	0.585658			0.0158	0.308066	0.0158	0.179202			0.0158	0.110819	0.0158	0.0481627			0.0158	0.0193325	0.0158	0.140405
				0.016	0.63946	0.016	0.586158			0.016	0.308402	0.016	0.179363			0.016	0.110877	0.016	0.0482073			0.016	0.0193476	0.016	0.140463
				0.0162	0.640111	0.0162	0.586658			0.0162	0.308739	0.0162	0.179524			0.0162	0.110936	0.0162	0.0482519			0.0162	0.0193627	0.0162	0.14052
				0.0164	0.640762	0.0164	0.587159			0.0164	0.309075	0.0164	0.179685			0.0164	0.110994	0.0164	0.0482966			0.0164	0.0193778	0.0164	0.140578
				0.0166	0.641414	0.0166	0.587659			0.0166	0.309412	0.0166	0.179846			0.0166	0.111053	0.0166	0.0483413			0.0166	0.019393	0.0166	0.140636
				0.0168	0.642066	0.0168	0.58816			0.0168	0.309749	0.0168	0.180007			0.0168	0.111111	0.0168	0.0483861			0.0168	0.0194081	0.0168	0.140694
				0.017	0.642718	0.017	0.588661			0.017	0.310087	0.017	0.180168			0.017	0.11117	0.017	0.0484309			0.017	0.0194233	0.017	0.140752
				0.0172	0.64337	0.0172	0.589162			0.0172	0.310424	0.0172	0.18033			0.0172	0.111228	0.0172	0.0484757			0.0172	0.0194385	0.0172	0.14081
				0.0174	0.644023	0.0174	0.589663			0.0174	0.310762	0.0174	0.180491			0.0174	0.111287	0.0174	0.0485205			0.0174	0.0194537	0.0174	0.140868
				0.0176	0.644676	0.0176	0.590165			0.0176	0.3111	0.0176	0.180653			0.0176	0.111345	0.0176	0.0485654			0.0176	0.0194688	0.0176	0.140926
				0.0178	0.645329	0.0178	0.590666			0.0178	0.311439	0.0178	0.180815			0.0178	0.111404	0.0178	0.0486103			0.0178	0.0194841	0.0178	0.140984
				0.018	0.645982	0.018	0.591168			0.018	0.311777	0.018	0.180977			0.018	0.111463	0.018	0.0486553			0.018	0.0194993	0.018	0.141042
				0.0182	0.646636	0.0182	0.59167			0.0182	0.312116	0.0182	0.181139			0.0182	0.111521	0.0182	0.0487003			0.0182	0.0195145	0.0182	0.1411
				0.0184	0.64729	0.0184	0.592172			0.0184	0.312455	0.0184	0.181301			0.0184	0.11158	0.0184	0.0487453			0.0184	0.0195297	0.0184	0.141158
				0.0186	0.647944	0.0186	0.592674			0.0186	0.312794	0.0186	0.181463			0.0186	0.111638	0.0186	0.0487903			0.0186	0.019545	0.0186	0.141217
				0.0188	0.648599	0.0188	0.593177			0.0188	0.313134	0.0188	0.181625			0.0188	0.111697	0.0188	0.0488354			0.0188	0.0195602	0.0188	0.141275
				0.019	0.649254	0.019	0.593679			0.019	0.313474	0.019	0.181788			0.019	0.111756	0.019	0.0488806			0.019	0.0195755	0.019	0.141333
				0.0192	0.649909	0.0192	0.594182			0.0192	0.313814	0.0192	0.18195			0.0192	0.111815	0.0192	0.0489257			0.0192	0.0195908	0.0192	0.141391
				0.0194	0.650564	0.0194	0.594685			0.0194	0.314154	0.0194	0.182113			0.0194	0.111873	0.0194	0.0489709			0.0194	0.0196061	0.0194	0.141449
				0.0196	0.65122	0.0196	0.595188			0.0196	0.314495	0.0196	0.182275			0.0196	0.111932	0.0196	0.0490161			0.0196	0.0196214	0.0196	0.141507
				0.0198	0.651876	0.0198	0.595691			0.0198	0.314835	0.0198	0.182438			0.0198	0.111991	0.0198	0.0490614			0.0198	0.0196367	0.0198	0.141565
				0.02	0.652532	0.02	0.596195			0.02	0.315176	0.02	0.182601			0.02	0.11205	0.02	0.0491067			0.02	0.019652	0.02	0.141624
				0.0202	0.653189	0.0202	0.596698			0.0202	0.315517	0.0202	0.182764			0.0202	0.112109	0.0202	0.049152			0.0202	0.0196673	0.0202	0.141682
				0.0204	0.653846	0.0204	0.597202			0.0204	0.315859	0.0204	0.182927			0.0204	0.112168	0.0204	0.0491974			0.0204	0.0196826	0.0204	0.14174
				0.0206	0.654503	0.0206	0.597706			0.0206	0.316201	0.0206	0.18309			0.0206	0.112226	0.0206	0.0492428			0.0206	0.019698	0.0206	0.141798
				0.0208	0.65516	0.0208	0.59821			0.0208	0.316542	0.0208	0.183254			0.0208	0.112285	0.0208	0.0492882			0.0208	0.0197134	0.0208	0.141856
				0.021	0.655818	0.021	0.598714			0.021	0.316885	0.021	0.183417			0.021	0.112344	0.021	0.0493337			0.021	0.0197287	0.021	0.141915
				0.0212	0.656476	0.0212	0.599218			0.0212	0.317227	0.0212	0.183581			0.0212	0.112403	0.0212	0.0493792			0.0212	0.0197441	0.0212	0.141973
				0.0214	0.657134	0.0214	0.599723			0.0214	0.31757	0.0214	0.183744			0.0214	0.112462	0.0214	0.0494247			0.0214	0.0197595	0.0214	0.142031
				0.0216	0.657792	0.0216	0.600227			0.0216	0.317913	0.0216	0.183908			0.0216	0.112521	0.0216	0.0494703			0.0216	0.0197749	0.0216	0.14209
				0.0218	0.658451	0.0218	0.600732			0.0218	0.318256	0.0218	0.184072			0.0218	0.11258	0.0218	0.0495159			0.0218	0.0197903	0.0218	0.142148
				0.022	0.65911	0.022	0.601237			0.022	0.318599	0.022	0.184236			0.022	0.112639	0.022	0.0495615			0.022	0.0198057	0.022	0.142206
				0.0222	0.659769	0.0222	0.601742			0.0222	0.318943	0.0222	0.1844			0.0222	0.112698	0.0222	0.0496072			0.0222	0.0198211	0.0222	0.142265
				0.0224	0.660429	0.0224	0.602248			0.0224	0.319286	0.0224	0.184564			0.0224	0.112757	0.0224	0.0496529			0.0224	0.0198366	0.0224	0.142323
				0.0226	0.661089	0.0226	0.602753			0.0226	0.31963	0.0226	0.184728			0.0226	0.112817	0.0226	0.0496986			0.0226	0.019852	0.0226	0.142381
				0.0228	0.661749	0.0228	0.603259			0.0228	0.319975	0.0228	0.184892			0.0228	0.112876	0.0228	0.0497444			0.0228	0.0198675	0.0228	0.14244
				0.023	0.662409	0.023	0.603764			0.023	0.320319	0.023	0.185057			0.023	0.112935	0.023	0.0497902			0.023	0.019883	0.023	0.142498
				0.0232	0.663069	0.0232	0.60427			0.0232	0.320664	0.0232	0.185221			0.0232	0.112994	0.0232	0.0498361			0.0232	0.0198984	0.0232	0.142557
				0.0234	0.66373	0.0234	0.604776			0.0234	0.321009	0.0234	0.185386			0.0234	0.113053	0.0234	0.049882			0.0234	0.0199139	0.0234	0.142615
				0.0236	0.664391	0.0236	0.605283			0.0236	0.321354	0.0236	0.18555			0.0236	0.113112	0.0236	0.0499279			0.0236	0.0199294	0.0236	0.142673
				0.0238	0.665053	0.0238	0.605789			0.0238	0.3217	0.0238	0.185715			0.0238	0.113172	0.0238	0.0499738			0.0238	0.019945	0.0238	0.142732
				0.024	0.665714	0.024	0.606295			0.024	0.322045	0.024	0.18588			0.024	0.113231	0.024	0.0500198			0.024	0.0199605	0.024	0.14279
				0.0242	0.666376	0.0242	0.606802			0.0242	0.322391	0.0242	0.186045			0.0242	0.11329	0.0242	0.0500658			0.0242	0.019976	0.0242	0.142849
				0.0244	0.667039	0.0244	0.607309			0.0244	0.322738	0.0244	0.18621			0.0244	0.113349	0.0244	0.0501119			0.0244	0.0199916	0.0244	0.142907
				0.0246	0.667701	0.0246	0.607816			0.0246	0.323084	0.0246	0.186376			0.0246	0.113409	0.0246	0.050158			0.0246	0.0200071	0.0246	0.142966
				0.0248	0.668364	0.0248	0.608323			0.0248	0.323431	0.0248	0.186541			0.0248	0.113468	0.0248	0.0502041			0.0248	0.0200227	0.0248	0.143024
				0.025	0.669027	0.025	0.60883			0.025	0.323778	0.025	0.186706			0.025	0.113527	0.025	0.0502502			0.025	0.0200382	0.025	0.143083
				0.0252	0.66969	0.0252	0.609338			0.0252	0.324125	0.0252	0.186872			0.0252	0.113587	0.0252	0.0502964			0.0252	0.0200538	0.0252	0.143142
				0.0254	0.670353	0.0254	0.609845			0.0254	0.324472	0.0254	0.187038			0.0254	0.113646	0.0254	0.0503427			0.0254	0.0200694	0.0254	0.1432
				0.0256	0.671017	0.0256	0.610353			0.0256	0.32482	0.0256	0.187203			0.0256	0.113706	0.0256	0.0503889			0.0256	0.020085	0.0256	0.143259
				0.0258	0.671681	0.0258	0.610861			0.0258	0.325168	0.0258	0.187369			0.0258	0.113765	0.0258	0.0504352			0.0258	0.0201006	0.0258	0.143317
				0.026	0.672345	0.026	0.611369			0.026	0.325516	0.026	0.187535			0.026	0.113825	0.026	0.0504815			0.026	0.0201163	0.026	0.143376
				0.0262	0.67301	0.0262	0.611877			0.0262	0.325864	0.0262	0.187701			0.0262	0.113884	0.0262	0.0505279			0.0262	0.0201319	0.0262	0.143435
				0.0264	0.673675	0.0264	0.612386			0.0264	0.326213	0.0264	0.187867			0.0264	0.113944	0.0264	0.0505743			0.0264	0.0201475	0.0264	0.143493
				0.0266	0.67434	0.0266	0.612894			0.0266	0.326561	0.0266	0.188034			0.0266	0.114003	0.0266	0.0506207			0.0266	0.0201632	0.0266	0.143552
				0.0268	0.675005	0.0268	0.613403			0.0268	0.32691	0.0268	0.1882			0.0268	0.114063	0.0268	0.0506672			0.0268	0.0201789	0.0268	0.143611
				0.027	0.67567	0.027	0.613911			0.027	0.32726	0.027	0.188366			0.027	0.114122	0.027	0.0507137			0.027	0.0201945	0.027	0.143669
				0.0272	0.676336	0.0272	0.61442			0.0272	0.327609	0.0272	0.188533			0.0272	0.114182	0.0272	0.0507602			0.0272	0.0202102	0.0272	0.143728
				0.0274	0.677002	0.0274	0.614929			0.0274	0.327959	0.0274	0.1887			0.0274	0.114242	0.0274	0.0508068			0.0274	0.0202259	0.0274	0.143787
				0.0276	0.677669	0.0276	0.615439			0.0276	0.328309	0.0276	0.188866			0.0276	0.114301	0.0276	0.0508534			0.0276	0.0202416	0.0276	0.143845
				0.0278	0.678335	0.0278	0.615948			0.0278	0.328659	0.0278	0.189033			0.0278	0.114361	0.0278	0.0509001			0.0278	0.0202574	0.0278	0.143904
				0.028	0.679002	0.028	0.616458			0.028	0.32901	0.028	0.1892			0.028	0.114421	0.028	0.0509468			0.028	0.0202731	0.028	0.143963
				0.0282	0.679669	0.0282	0.616967			0.0282	0.32936	0.0282	0.189367			0.0282	0.11448	0.0282	0.0509935			0.0282	0.0202888	0.0282	0.144022
				0.0284	0.680336	0.0284	0.617477			0.0284	0.329711	0.0284	0.189535			0.0284	0.11454	0.0284	0.0510402			0.0284	0.0203046	0.0284	0.144081
				0.0286	0.681004	0.0286	0.617987			0.0286	0.330062	0.0286	0.189702			0.0286	0.1146	0.0286	0.051087			0.0286	0.0203203	0.0286	0.144139
				0.0288	0.681672	0.0288	0.618497			0.0288	0.330414	0.0288	0.189869			0.0288	0.114659	0.0288	0.0511338			0.0288	0.0203361	0.0288	0.144198
				0.029	0.68234	0.029	0.619007			0.029	0.330766	0.029	0.190037			0.029	0.114719	0.029	0.0511807			0.029	0.0203519	0.029	0.144257
				0.0292	0.683008	0.0292	0.619518			0.0292	0.331117	0.0292	0.190204			0.0292	0.114779	0.0292	0.0512276			0.0292	0.0203677	0.0292	0.144316
				0.0294	0.683677	0.0294	0.620028			0.0294	0.33147	0.0294	0.190372			0.0294	0.114839	0.0294	0.0512745			0.0294	0.0203835	0.0294	0.144375
				0.0296	0.684346	0.0296	0.620539			0.0296	0.331822	0.0296	0.19054			0.0296	0.114899	0.0296	0.0513214			0.0296	0.0203993	0.0296	0.144434
				0.0298	0.685015	0.0298	0.62105			0.0298	0.332174	0.0298	0.190708			0.0298	0.114959	0.0298	0.0513684			0.0298	0.0204151	0.0298	0.144493
				0.03	0.685684	0.03	0.621561			0.03	0.332527	0.03	0.190876			0.03	0.115019	0.03	0.0514155			0.03	0.020431	0.03	0.144551
				0.0302	0.686354	0.0302	0.622072			0.0302	0.33288	0.0302	0.191044			0.0302	0.115078	0.0302	0.0514625			0.0302	0.0204468	0.0302	0.14461
				0.0304	0.687024	0.0304	0.622583			0.0304	0.333234	0.0304	0.191212			0.0304	0.115138	0.0304	0.0515096			0.0304	0.0204627	0.0304	0.144669
				0.0306	0.687694	0.0306	0.623095			0.0306	0.333587	0.0306	0.19138			0.0306	0.115198	0.0306	0.0515568			0.0306	0.0204785	0.0306	0.144728
				0.0308	0.688364	0.0308	0.623606			0.0308	0.333941	0.0308	0.191549			0.0308	0.115258	0.0308	0.0516039			0.0308	0.0204944	0.0308	0.144787
				0.031	0.689034	0.031	0.624118			0.031	0.334295	0.031	0.191717			0.031	0.115318	0.031	0.0516511			0.031	0.0205103	0.031	0.144846
				0.0312	0.689705	0.0312	0.62463			0.0312	0.334649	0.0312	0.191886			0.0312	0.115378	0.0312	0.0516984			0.0312	0.0205262	0.0312	0.144905
				0.0314	0.690376	0.0314	0.625142			0.0314	0.335004	0.0314	0.192055			0.0314	0.115438	0.0314	0.0517457			0.0314	0.0205421	0.0314	0.144964
				0.0316	0.691048	0.0316	0.625654			0.0316	0.335358	0.0316	0.192223			0.0316	0.115499	0.0316	0.051793			0.0316	0.020558	0.0316	0.145023
				0.0318	0.691719	0.0318	0.626166			0.0318	0.335713	0.0318	0.192392			0.0318	0.115559	0.0318	0.0518403			0.0318	0.0205739	0.0318	0.145082
				0.032	0.692391	0.032	0.626679			0.032	0.336069	0.032	0.192561			0.032	0.115619	0.032	0.0518877			0.032	0.0205899	0.032	0.145141
				0.0322	0.693063	0.0322	0.627191			0.0322	0.336424	0.0322	0.19273			0.0322	0.115679	0.0322	0.0519351			0.0322	0.0206058	0.0322	0.145201
				0.0324	0.693735	0.0324	0.627704			0.0324	0.33678	0.0324	0.1929			0.0324	0.115739	0.0324	0.0519826			0.0324	0.0206218	0.0324	0.14526
				0.0326	0.694408	0.0326	0.628217			0.0326	0.337135	0.0326	0.193069			0.0326	0.115799	0.0326	0.0520301			0.0326	0.0206377	0.0326	0.145319
				0.0328	0.695081	0.0328	0.62873			0.0328	0.337492	0.0328	0.193238			0.0328	0.115859	0.0328	0.0520776			0.0328	0.0206537	0.0328	0.145378
				0.033	0.695753	0.033	0.629243			0.033	0.337848	0.033	0.193408			0.033	0.11592	0.033	0.0521251			0.033	0.0206697	0.033	0.145437
				0.0332	0.696427	0.0332	0.629756			0.0332	0.338205	0.0332	0.193578			0.0332	0.11598	0.0332	0.0521727			0.0332	0.0206857	0.0332	0.145496
				0.0334	0.6971	0.0334	0.63027			0.0334	0.338561	0.0334	0.193747			0.0334	0.11604	0.0334	0.0522204			0.0334	0.0207017	0.0334	0.145555
				0.0336	0.697774	0.0336	0.630783			0.0336	0.338918	0.0336	0.193917			0.0336	0.1161	0.0336	0.052268			0.0336	0.0207177	0.0336	0.145614
				0.0338	0.698448	0.0338	0.631297			0.0338	0.339276	0.0338	0.194087			0.0338	0.116161	0.0338	0.0523157			0.0338	0.0207338	0.0338	0.145674
				0.034	0.699122	0.034	0.631811			0.034	0.339633	0.034	0.194257			0.034	0.116221	0.034	0.0523635			0.034	0.0207498	0.034	0.145733
				0.0342	0.699796	0.0342	0.632324			0.0342	0.339991	0.0342	0.194427			0.0342	0.116281	0.0342	0.0524112			0.0342	0.0207659	0.0342	0.145792
				0.0344	0.700471	0.0344	0.632839			0.0344	0.340349	0.0344	0.194598			0.0344	0.116342	0.0344	0.052459			0.0344	0.0207819	0.0344	0.145851
				0.0346	0.701146	0.0346	0.633353			0.0346	0.340707	0.0346	0.194768			0.0346	0.116402	0.0346	0.0525069			0.0346	0.020798	0.0346	0.145911
				0.0348	0.701821	0.0348	0.633867			0.0348	0.341066	0.0348	0.194939			0.0348	0.116463	0.0348	0.0525548			0.0348	0.0208141	0.0348	0.14597
				0.035	0.702496	0.035	0.634382			0.035	0.341425	0.035	0.195109			0.035	0.116523	0.035	0.0526027			0.035	0.0208302	0.035	0.146029
				0.0352	0.703172	0.0352	0.634896			0.0352	0.341783	0.0352	0.19528			0.0352	0.116584	0.0352	0.0526506			0.0352	0.0208463	0.0352	0.146088
				0.0354	0.703848	0.0354	0.635411			0.0354	0.342143	0.0354	0.195451			0.0354	0.116644	0.0354	0.0526986			0.0354	0.0208624	0.0354	0.146148
				0.0356	0.704524	0.0356	0.635926			0.0356	0.342502	0.0356	0.195621			0.0356	0.116705	0.0356	0.0527466			0.0356	0.0208786	0.0356	0.146207
				0.0358	0.7052	0.0358	0.636441			0.0358	0.342862	0.0358	0.195792			0.0358	0.116765	0.0358	0.0527947			0.0358	0.0208947	0.0358	0.146266
				0.036	0.705877	0.036	0.636956			0.036	0.343222	0.036	0.195963			0.036	0.116826	0.036	0.0528428			0.036	0.0209108	0.036	0.146326
				0.0362	0.706554	0.0362	0.637471			0.0362	0.343582	0.0362	0.196135			0.0362	0.116886	0.0362	0.0528909			0.0362	0.020927	0.0362	0.146385
				0.0364	0.707231	0.0364	0.637987			0.0364	0.343942	0.0364	0.196306			0.0364	0.116947	0.0364	0.0529391			0.0364	0.0209432	0.0364	0.146444
				0.0366	0.707908	0.0366	0.638502			0.0366	0.344303	0.0366	0.196477			0.0366	0.117007	0.0366	0.0529873			0.0366	0.0209594	0.0366	0.146504
				0.0368	0.708585	0.0368	0.639018			0.0368	0.344664	0.0368	0.196649			0.0368	0.117068	0.0368	0.0530355			0.0368	0.0209755	0.0368	0.146563
				0.037	0.709263	0.037	0.639534			0.037	0.345025	0.037	0.19682			0.037	0.117129	0.037	0.0530838			0.037	0.0209917	0.037	0.146623
				0.0372	0.709941	0.0372	0.64005			0.0372	0.345386	0.0372	0.196992			0.0372	0.117189	0.0372	0.0531321			0.0372	0.021008	0.0372	0.146682
				0.0374	0.710619	0.0374	0.640566			0.0374	0.345747	0.0374	0.197164			0.0374	0.11725	0.0374	0.0531804			0.0374	0.0210242	0.0374	0.146742
				0.0376	0.711297	0.0376	0.641082			0.0376	0.346109	0.0376	0.197336			0.0376	0.117311	0.0376	0.0532288			0.0376	0.0210404	0.0376	0.146801
				0.0378	0.711976	0.0378	0.641598			0.0378	0.346471	0.0378	0.197508			0.0378	0.117372	0.0378	0.0532772			0.0378	0.0210567	0.0378	0.146861
				0.038	0.712655	0.038	0.642115			0.038	0.346833	0.038	0.19768			0.038	0.117432	0.038	0.0533256			0.038	0.0210729	0.038	0.14692
				0.0382	0.713334	0.0382	0.642632			0.0382	0.347196	0.0382	0.197852			0.0382	0.117493	0.0382	0.0533741			0.0382	0.0210892	0.0382	0.14698
				0.0384	0.714013	0.0384	0.643148			0.0384	0.347559	0.0384	0.198024			0.0384	0.117554	0.0384	0.0534226			0.0384	0.0211055	0.0384	0.147039
				0.0386	0.714692	0.0386	0.643665			0.0386	0.347922	0.0386	0.198197			0.0386	0.117615	0.0386	0.0534712			0.0386	0.0211218	0.0386	0.147099
				0.0388	0.715372	0.0388	0.644182			0.0388	0.348285	0.0388	0.198369			0.0388	0.117676	0.0388	0.0535198			0.0388	0.0211381	0.0388	0.147158
				0.039	0.716052	0.039	0.644699			0.039	0.348648	0.039	0.198542			0.039	0.117736	0.039	0.0535684			0.039	0.0211544	0.039	0.147218
				0.0392	0.716732	0.0392	0.645217			0.0392	0.349012	0.0392	0.198715			0.0392	0.117797	0.0392	0.0536171			0.0392	0.0211707	0.0392	0.147277
				0.0394	0.717413	0.0394	0.645734			0.0394	0.349376	0.0394	0.198888			0.0394	0.117858	0.0394	0.0536658			0.0394	0.021187	0.0394	0.147337
				0.0396	0.718093	0.0396	0.646251			0.0396	0.34974	0.0396	0.199061			0.0396	0.117919	0.0396	0.0537145			0.0396	0.0212034	0.0396	0.147396
				0.0398	0.718774	0.0398	0.646769			0.0398	0.350104	0.0398	0.199234			0.0398	0.11798	0.0398	0.0537633			0.0398	0.0212197	0.0398	0.147456
				0.04	0.719455	0.04	0.647287			0.04	0.350469	0.04	0.199407			0.04	0.118041	0.04	0.0538121			0.04	0.0212361	0.04	0.147516
				0.0402	0.720136	0.0402	0.647805			0.0402	0.350833	0.0402	0.19958			0.0402	0.118102	0.0402	0.053861			0.0402	0.0212524	0.0402	0.147575
				0.0404	0.720818	0.0404	0.648323			0.0404	0.351199	0.0404	0.199753			0.0404	0.118163	0.0404	0.0539098			0.0404	0.0212688	0.0404	0.147635
				0.0406	0.721499	0.0406	0.648841			0.0406	0.351564	0.0406	0.199927			0.0406	0.118224	0.0406	0.0539587			0.0406	0.0212852	0.0406	0.147695
				0.0408	0.722181	0.0408	0.649359			0.0408	0.351929	0.0408	0.2001			0.0408	0.118285	0.0408	0.0540077			0.0408	0.0213016	0.0408	0.147754
				0.041	0.722863	0.041	0.649878			0.041	0.352295	0.041	0.200274			0.041	0.118346	0.041	0.0540567			0.041	0.021318	0.041	0.147814
				0.0412	0.723546	0.0412	0.650396			0.0412	0.352661	0.0412	0.200448			0.0412	0.118408	0.0412	0.0541057			0.0412	0.0213345	0.0412	0.147874
				0.0414	0.724228	0.0414	0.650915			0.0414	0.353027	0.0414	0.200622			0.0414	0.118469	0.0414	0.0541548			0.0414	0.0213509	0.0414	0.147934
				0.0416	0.724911	0.0416	0.651434			0.0416	0.353394	0.0416	0.200796			0.0416	0.11853	0.0416	0.0542039			0.0416	0.0213674	0.0416	0.147993
				0.0418	0.725594	0.0418	0.651952			0.0418	0.35376	0.0418	0.20097			0.0418	0.118591	0.0418	0.054253			0.0418	0.0213838	0.0418	0.148053
				0.042	0.726277	0.042	0.652471			0.042	0.354127	0.042	0.201144			0.042	0.118652	0.042	0.0543022			0.042	0.0214003	0.042	0.148113
				0.0422	0.726961	0.0422	0.652991			0.0422	0.354494	0.0422	0.201318			0.0422	0.118713	0.0422	0.0543514			0.0422	0.0214168	0.0422	0.148173
				0.0424	0.727644	0.0424	0.65351			0.0424	0.354862	0.0424	0.201492			0.0424	0.118775	0.0424	0.0544006			0.0424	0.0214333	0.0424	0.148233
				0.0426	0.728328	0.0426	0.654029			0.0426	0.355229	0.0426	0.201667			0.0426	0.118836	0.0426	0.0544499			0.0426	0.0214498	0.0426	0.148292
				0.0428	0.729012	0.0428	0.654549			0.0428	0.355597	0.0428	0.201841			0.0428	0.118897	0.0428	0.0544992			0.0428	0.0214663	0.0428	0.148352
				0.043	0.729696	0.043	0.655068			0.043	0.355965	0.043	0.202016			0.043	0.118958	0.043	0.0545486			0.043	0.0214828	0.043	0.148412
				0.0432	0.730381	0.0432	0.655588			0.0432	0.356334	0.0432	0.202191			0.0432	0.11902	0.0432	0.0545979			0.0432	0.0214993	0.0432	0.148472
				0.0434	0.731066	0.0434	0.656108			0.0434	0.356702	0.0434	0.202366			0.0434	0.119081	0.0434	0.0546474			0.0434	0.0215159	0.0434	0.148532
				0.0436	0.73175	0.0436	0.656628			0.0436	0.357071	0.0436	0.202541			0.0436	0.119143	0.0436	0.0546968			0.0436	0.0215324	0.0436	0.148592
				0.0438	0.732436	0.0438	0.657148			0.0438	0.35744	0.0438	0.202716			0.0438	0.119204	0.0438	0.0547463			0.0438	0.021549	0.0438	0.148652
				0.044	0.733121	0.044	0.657668			0.044	0.357809	0.044	0.202891			0.044	0.119265	0.044	0.0547959			0.044	0.0215656	0.044	0.148712
				0.0442	0.733806	0.0442	0.658189			0.0442	0.358179	0.0442	0.203066			0.0442	0.119327	0.0442	0.0548454			0.0442	0.0215822	0.0442	0.148771
				0.0444	0.734492	0.0444	0.658709			0.0444	0.358548	0.0444	0.203242			0.0444	0.119388	0.0444	0.054895			0.0444	0.0215988	0.0444	0.148831
				0.0446	0.735178	0.0446	0.65923			0.0446	0.358918	0.0446	0.203417			0.0446	0.11945	0.0446	0.0549447			0.0446	0.0216154	0.0446	0.148891
				0.0448	0.735864	0.0448	0.65975			0.0448	0.359288	0.0448	0.203593			0.0448	0.119511	0.0448	0.0549943			0.0448	0.021632	0.0448	0.148951
				0.045	0.73655	0.045	0.660271			0.045	0.359659	0.045	0.203769			0.045	0.119573	0.045	0.0550441			0.045	0.0216486	0.045	0.149011
				0.0452	0.737237	0.0452	0.660792			0.0452	0.360029	0.0452	0.203944			0.0452	0.119634	0.0452	0.0550938			0.0452	0.0216653	0.0452	0.149071
				0.0454	0.737924	0.0454	0.661313			0.0454	0.3604	0.0454	0.20412			0.0454	0.119696	0.0454	0.0551436			0.0454	0.0216819	0.0454	0.149131
				0.0456	0.738611	0.0456	0.661834			0.0456	0.360771	0.0456	0.204296			0.0456	0.119757	0.0456	0.0551934			0.0456	0.0216986	0.0456	0.149191
				0.0458	0.739298	0.0458	0.662356			0.0458	0.361143	0.0458	0.204473			0.0458	0.119819	0.0458	0.0552433			0.0458	0.0217153	0.0458	0.149252
				0.046	0.739985	0.046	0.662877			0.046	0.361514	0.046	0.204649			0.046	0.119881	0.046	0.0552932			0.046	0.021732	0.046	0.149312
				0.0462	0.740673	0.0462	0.663399			0.0462	0.361886	0.0462	0.204825			0.0462	0.119942	0.0462	0.0553431			0.0462	0.0217487	0.0462	0.149372
				0.0464	0.74136	0.0464	0.66392			0.0464	0.362258	0.0464	0.205002			0.0464	0.120004	0.0464	0.0553931			0.0464	0.0217654	0.0464	0.149432
				0.0466	0.742048	0.0466	0.664442			0.0466	0.36263	0.0466	0.205178			0.0466	0.120066	0.0466	0.0554431			0.0466	0.0217821	0.0466	0.149492
				0.0468	0.742736	0.0468	0.664964			0.0468	0.363003	0.0468	0.205355			0.0468	0.120127	0.0468	0.0554931			0.0468	0.0217988	0.0468	0.149552
				0.047	0.743425	0.047	0.665486			0.047	0.363376	0.047	0.205531			0.047	0.120189	0.047	0.0555432			0.047	0.0218156	0.047	0.149612
				0.0472	0.744113	0.0472	0.666008			0.0472	0.363748	0.0472	0.205708			0.0472	0.120251	0.0472	0.0555933			0.0472	0.0218323	0.0472	0.149672
				0.0474	0.744802	0.0474	0.66653			0.0474	0.364122	0.0474	0.205885			0.0474	0.120313	0.0474	0.0556435			0.0474	0.0218491	0.0474	0.149733
				0.0476	0.745491	0.0476	0.667052			0.0476	0.364495	0.0476	0.206062			0.0476	0.120374	0.0476	0.0556937			0.0476	0.0218659	0.0476	0.149793
				0.0478	0.74618	0.0478	0.667575			0.0478	0.364869	0.0478	0.20624			0.0478	0.120436	0.0478	0.0557439			0.0478	0.0218826	0.0478	0.149853
				0.048	0.746869	0.048	0.668097			0.048	0.365243	0.048	0.206417			0.048	0.120498	0.048	0.0557942			0.048	0.0218994	0.048	0.149913
				0.0482	0.747559	0.0482	0.66862			0.0482	0.365617	0.0482	0.206594			0.0482	0.12056	0.0482	0.0558445			0.0482	0.0219162	0.0482	0.149973
				0.0484	0.748249	0.0484	0.669143			0.0484	0.365991	0.0484	0.206772			0.0484	0.120622	0.0484	0.0558948			0.0484	0.0219331	0.0484	0.150034
				0.0486	0.748939	0.0486	0.669666			0.0486	0.366366	0.0486	0.206949			0.0486	0.120684	0.0486	0.0559452			0.0486	0.0219499	0.0486	0.150094
				0.0488	0.749629	0.0488	0.670189			0.0488	0.36674	0.0488	0.207127			0.0488	0.120746	0.0488	0.0559956			0.0488	0.0219667	0.0488	0.150154
				0.049	0.750319	0.049	0.670712			0.049	0.367115	0.049	0.207305			0.049	0.120808	0.049	0.056046			0.049	0.0219836	0.049	0.150214
				0.0492	0.751009	0.0492	0.671235			0.0492	0.367491	0.0492	0.207483			0.0492	0.12087	0.0492	0.0560965			0.0492	0.0220004	0.0492	0.150275
				0.0494	0.7517	0.0494	0.671758			0.0494	0.367866	0.0494	0.207661			0.0494	0.120932	0.0494	0.056147			0.0494	0.0220173	0.0494	0.150335
				0.0496	0.752391	0.0496	0.672282			0.0496	0.368242	0.0496	0.207839			0.0496	0.120994	0.0496	0.0561976			0.0496	0.0220342	0.0496	0.150395
				0.0498	0.753082	0.0498	0.672805			0.0498	0.368618	0.0498	0.208017			0.0498	0.121056	0.0498	0.0562482			0.0498	0.0220511	0.0498	0.150456
				0.05	0.753773	0.05	0.673329			0.05	0.368994	0.05	0.208195			0.05	0.121118	0.05	0.0562988			0.05	0.022068	0.05	0.150516
				0.0502	0.754465	0.0502	0.673853			0.0502	0.36937	0.0502	0.208373			0.0502	0.12118	0.0502	0.0563495			0.0502	0.0220849	0.0502	0.150576
				0.0504	0.755156	0.0504	0.674377			0.0504	0.369747	0.0504	0.208552			0.0504	0.121242	0.0504	0.0564002			0.0504	0.0221018	0.0504	0.150637
				0.0506	0.755848	0.0506	0.674901			0.0506	0.370124	0.0506	0.208731			0.0506	0.121304	0.0506	0.0564509			0.0506	0.0221188	0.0506	0.150697
				0.0508	0.75654	0.0508	0.675425			0.0508	0.370501	0.0508	0.208909			0.0508	0.121366	0.0508	0.0565017			0.0508	0.0221357	0.0508	0.150758
				0.051	0.757232	0.051	0.675949			0.051	0.370878	0.051	0.209088			0.051	0.121428	0.051	0.0565525			0.051	0.0221527	0.051	0.150818
				0.0512	0.757925	0.0512	0.676473			0.0512	0.371256	0.0512	0.209267			0.0512	0.121491	0.0512	0.0566034			0.0512	0.0221697	0.0512	0.150878
				0.0514	0.758617	0.0514	0.676997			0.0514	0.371634	0.0514	0.209446			0.0514	0.121553	0.0514	0.0566543			0.0514	0.0221866	0.0514	0.150939
				0.0516	0.75931	0.0516	0.677522			0.0516	0.372012	0.0516	0.209625			0.0516	0.121615	0.0516	0.0567052			0.0516	0.0222036	0.0516	0.150999
				0.0518	0.760003	0.0518	0.678047			0.0518	0.37239	0.0518	0.209804			0.0518	0.121677	0.0518	0.0567562			0.0518	0.0222206	0.0518	0.15106
				0.052	0.760696	0.052	0.678571			0.052	0.372768	0.052	0.209984			0.052	0.12174	0.052	0.0568072			0.052	0.0222377	0.052	0.15112
				0.0522	0.761389	0.0522	0.679096			0.0522	0.373147	0.0522	0.210163			0.0522	0.121802	0.0522	0.0568582			0.0522	0.0222547	0.0522	0.151181
				0.0524	0.762083	0.0524	0.679621			0.0524	0.373526	0.0524	0.210343			0.0524	0.121864	0.0524	0.0569093			0.0524	0.0222717	0.0524	0.151241
				0.0526	0.762776	0.0526	0.680146			0.0526	0.373905	0.0526	0.210522			0.0526	0.121927	0.0526	0.0569604			0.0526	0.0222888	0.0526	0.151302
				0.0528	0.76347	0.0528	0.680671			0.0528	0.374284	0.0528	0.210702			0.0528	0.121989	0.0528	0.0570115			0.0528	0.0223058	0.0528	0.151363
				0.053	0.764164	0.053	0.681196			0.053	0.374664	0.053	0.210882			0.053	0.122051	0.053	0.0570627			0.053	0.0223229	0.053	0.151423
				0.0532	0.764858	0.0532	0.681722			0.0532	0.375044	0.0532	0.211062			0.0532	0.122114	0.0532	0.0571139			0.0532	0.02234	0.0532	0.151484
				0.0534	0.765552	0.0534	0.682247			0.0534	0.375424	0.0534	0.211242			0.0534	0.122176	0.0534	0.0571652			0.0534	0.0223571	0.0534	0.151544
				0.0536	0.766247	0.0536	0.682773			0.0536	0.375804	0.0536	0.211422			0.0536	0.122239	0.0536	0.0572165			0.0536	0.0223742	0.0536	0.151605
				0.0538	0.766942	0.0538	0.683298			0.0538	0.376185	0.0538	0.211602			0.0538	0.122301	0.0538	0.0572678			0.0538	0.0223913	0.0538	0.151666
				0.054	0.767637	0.054	0.683824			0.054	0.376566	0.054	0.211783			0.054	0.122364	0.054	0.0573192			0.054	0.0224084	0.054	0.151726
				0.0542	0.768332	0.0542	0.68435			0.0542	0.376947	0.0542	0.211963			0.0542	0.122426	0.0542	0.0573706			0.0542	0.0224256	0.0542	0.151787
				0.0544	0.769027	0.0544	0.684876			0.0544	0.377328	0.0544	0.212144			0.0544	0.122489	0.0544	0.0574221			0.0544	0.0224427	0.0544	0.151848
				0.0546	0.769722	0.0546	0.685402			0.0546	0.377709	0.0546	0.212324			0.0546	0.122551	0.0546	0.0574735			0.0546	0.0224599	0.0546	0.151908
				0.0548	0.770418	0.0548	0.685928			0.0548	0.378091	0.0548	0.212505			0.0548	0.122614	0.0548	0.0575251			0.0548	0.022477	0.0548	0.151969
				0.055	0.771114	0.055	0.686454			0.055	0.378473	0.055	0.212686			0.055	0.122676	0.055	0.0575766			0.055	0.0224942	0.055	0.15203
				0.0552	0.771809	0.0552	0.686981			0.0552	0.378855	0.0552	0.212867			0.0552	0.122739	0.0552	0.0576282			0.0552	0.0225114	0.0552	0.15209
				0.0554	0.772506	0.0554	0.687507			0.0554	0.379237	0.0554	0.213048			0.0554	0.122802	0.0554	0.0576799			0.0554	0.0225286	0.0554	0.152151
				0.0556	0.773202	0.0556	0.688034			0.0556	0.37962	0.0556	0.213229			0.0556	0.122864	0.0556	0.0577315			0.0556	0.0225458	0.0556	0.152212
				0.0558	0.773898	0.0558	0.68856			0.0558	0.380003	0.0558	0.213411			0.0558	0.122927	0.0558	0.0577832			0.0558	0.0225631	0.0558	0.152273
				0.056	0.774595	0.056	0.689087			0.056	0.380386	0.056	0.213592			0.056	0.12299	0.056	0.057835			0.056	0.0225803	0.056	0.152333
				0.0562	0.775292	0.0562	0.689614			0.0562	0.380769	0.0562	0.213773			0.0562	0.123052	0.0562	0.0578868			0.0562	0.0225975	0.0562	0.152394
				0.0564	0.775989	0.0564	0.690141			0.0564	0.381153	0.0564	0.213955			0.0564	0.123115	0.0564	0.0579386			0.0564	0.0226148	0.0564	0.152455
				0.0566	0.776686	0.0566	0.690668			0.0566	0.381536	0.0566	0.214137			0.0566	0.123178	0.0566	0.0579904			0.0566	0.0226321	0.0566	0.152516
				0.0568	0.777383	0.0568	0.691195			0.0568	0.38192	0.0568	0.214319			0.0568	0.123241	0.0568	0.0580423			0.0568	0.0226494	0.0568	0.152577
				0.057	0.77808	0.057	0.691722			0.057	0.382304	0.057	0.2145			0.057	0.123304	0.057	0.0580943			0.057	0.0226667	0.057	0.152638
				0.0572	0.778778	0.0572	0.692249			0.0572	0.382689	0.0572	0.214682			0.0572	0.123366	0.0572	0.0581462			0.0572	0.022684	0.0572	0.152698
				0.0574	0.779476	0.0574	0.692777			0.0574	0.383073	0.0574	0.214865			0.0574	0.123429	0.0574	0.0581983			0.0574	0.0227013	0.0574	0.152759
				0.0576	0.780174	0.0576	0.693304			0.0576	0.383458	0.0576	0.215047			0.0576	0.123492	0.0576	0.0582503			0.0576	0.0227186	0.0576	0.15282
				0.0578	0.780872	0.0578	0.693832			0.0578	0.383843	0.0578	0.215229			0.0578	0.123555	0.0578	0.0583024			0.0578	0.0227359	0.0578	0.152881
				0.058	0.78157	0.058	0.694359			0.058	0.384229	0.058	0.215412			0.058	0.123618	0.058	0.0583545			0.058	0.0227533	0.058	0.152942
				0.0582	0.782268	0.0582	0.694887			0.0582	0.384614	0.0582	0.215594			0.0582	0.123681	0.0582	0.0584067			0.0582	0.0227707	0.0582	0.153003
				0.0584	0.782967	0.0584	0.695415			0.0584	0.385	0.0584	0.215777			0.0584	0.123744	0.0584	0.0584589			0.0584	0.022788	0.0584	0.153064
				0.0586	0.783666	0.0586	0.695943			0.0586	0.385386	0.0586	0.215959			0.0586	0.123807	0.0586	0.0585111			0.0586	0.0228054	0.0586	0.153125
				0.0588	0.784364	0.0588	0.696471			0.0588	0.385772	0.0588	0.216142			0.0588	0.12387	0.0588	0.0585634			0.0588	0.0228228	0.0588	0.153186
				0.059	0.785064	0.059	0.696999			0.059	0.386159	0.059	0.216325			0.059	0.123933	0.059	0.0586157			0.059	0.0228402	0.059	0.153247
				0.0592	0.785763	0.0592	0.697527			0.0592	0.386545	0.0592	0.216508			0.0592	0.123996	0.0592	0.058668			0.0592	0.0228576	0.0592	0.153308
				0.0594	0.786462	0.0594	0.698056			0.0594	0.386932	0.0594	0.216691			0.0594	0.124059	0.0594	0.0587204			0.0594	0.0228751	0.0594	0.153369
				0.0596	0.787162	0.0596	0.698584			0.0596	0.387319	0.0596	0.216875			0.0596	0.124122	0.0596	0.0587728			0.0596	0.0228925	0.0596	0.15343
				0.0598	0.787861	0.0598	0.699112			0.0598	0.387707	0.0598	0.217058			0.0598	0.124185	0.0598	0.0588253			0.0598	0.0229099	0.0598	0.153491
				0.06	0.788561	0.06	0.699641			0.06	0.388094	0.06	0.217242			0.06	0.124248	0.06	0.0588778			0.06	0.0229274	0.06	0.153552
				0.0602	0.789261	0.0602	0.70017			0.0602	0.388482	0.0602	0.217425			0.0602	0.124312	0.0602	0.0589303			0.0602	0.0229449	0.0602	0.153613
				0.0604	0.789961	0.0604	0.700698			0.0604	0.38887	0.0604	0.217609			0.0604	0.124375	0.0604	0.0589829			0.0604	0.0229624	0.0604	0.153674
				0.0606	0.790662	0.0606	0.701227			0.0606	0.389258	0.0606	0.217793			0.0606	0.124438	0.0606	0.0590355			0.0606	0.0229799	0.0606	0.153735
				0.0608	0.791362	0.0608	0.701756			0.0608	0.389647	0.0608	0.217976			0.0608	0.124501	0.0608	0.0590882			0.0608	0.0229974	0.0608	0.153797
				0.061	0.792063	0.061	0.702285			0.061	0.390036	0.061	0.21816			0.061	0.124565	0.061	0.0591408			0.061	0.0230149	0.061	0.153858
				0.0612	0.792763	0.0612	0.702814			0.0612	0.390425	0.0612	0.218344			0.0612	0.124628	0.0612	0.0591936			0.0612	0.0230324	0.0612	0.153919
				0.0614	0.793464	0.0614	0.703343			0.0614	0.390814	0.0614	0.218529			0.0614	0.124691	0.0614	0.0592463			0.0614	0.02305	0.0614	0.15398
				0.0616	0.794165	0.0616	0.703873			0.0616	0.391203	0.0616	0.218713			0.0616	0.124754	0.0616	0.0592991			0.0616	0.0230675	0.0616	0.154041
				0.0618	0.794866	0.0618	0.704402			0.0618	0.391593	0.0618	0.218897			0.0618	0.124818	0.0618	0.059352			0.0618	0.0230851	0.0618	0.154102
				0.062	0.795568	0.062	0.704932			0.062	0.391983	0.062	0.219082			0.062	0.124881	0.062	0.0594048			0.062	0.0231026	0.062	0.154164
				0.0622	0.796269	0.0622	0.705461			0.0622	0.392373	0.0622	0.219266			0.0622	0.124944	0.0622	0.0594578			0.0622	0.0231202	0.0622	0.154225
				0.0624	0.796971	0.0624	0.705991			0.0624	0.392763	0.0624	0.219451			0.0624	0.125008	0.0624	0.0595107			0.0624	0.0231378	0.0624	0.154286
				0.0626	0.797673	0.0626	0.70652			0.0626	0.393153	0.0626	0.219636			0.0626	0.125071	0.0626	0.0595637			0.0626	0.0231554	0.0626	0.154347
				0.0628	0.798375	0.0628	0.70705			0.0628	0.393544	0.0628	0.219821			0.0628	0.125135	0.0628	0.0596167			0.0628	0.0231731	0.0628	0.154409
				0.063	0.799077	0.063	0.70758			0.063	0.393935	0.063	0.220006			0.063	0.125198	0.063	0.0596698			0.063	0.0231907	0.063	0.15447
				0.0632	0.799779	0.0632	0.70811			0.0632	0.394326	0.0632	0.220191			0.0632	0.125262	0.0632	0.0597229			0.0632	0.0232083	0.0632	0.154531
				0.0634	0.800481	0.0634	0.70864			0.0634	0.394718	0.0634	0.220376			0.0634	0.125325	0.0634	0.059776			0.0634	0.023226	0.0634	0.154592
				0.0636	0.801184	0.0636	0.70917			0.0636	0.395109	0.0636	0.220561			0.0636	0.125389	0.0636	0.0598292			0.0636	0.0232436	0.0636	0.154654
				0.0638	0.801886	0.0638	0.7097			0.0638	0.395501	0.0638	0.220747			0.0638	0.125452	0.0638	0.0598824			0.0638	0.0232613	0.0638	0.154715
				0.064	0.802589	0.064	0.71023			0.064	0.395893	0.064	0.220932			0.064	0.125516	0.064	0.0599357			0.064	0.023279	0.064	0.154777
				0.0642	0.803292	0.0642	0.710761			0.0642	0.396285	0.0642	0.221118			0.0642	0.125579	0.0642	0.059989			0.0642	0.0232967	0.0642	0.154838
				0.0644	0.803995	0.0644	0.711291			0.0644	0.396678	0.0644	0.221304			0.0644	0.125643	0.0644	0.0600423			0.0644	0.0233144	0.0644	0.154899
				0.0646	0.804698	0.0646	0.711822			0.0646	0.397071	0.0646	0.22149			0.0646	0.125707	0.0646	0.0600957			0.0646	0.0233321	0.0646	0.154961
				0.0648	0.805402	0.0648	0.712352			0.0648	0.397464	0.0648	0.221676			0.0648	0.12577	0.0648	0.0601491			0.0648	0.0233499	0.0648	0.155022
				0.065	0.806105	0.065	0.712883			0.065	0.397857	0.065	0.221862			0.065	0.125834	0.065	0.0602026			0.065	0.0233676	0.065	0.155083
				0.0652	0.806809	0.0652	0.713414			0.0652	0.39825	0.0652	0.222048			0.0652	0.125898	0.0652	0.060256			0.0652	0.0233854	0.0652	0.155145
				0.0654	0.807513	0.0654	0.713945			0.0654	0.398644	0.0654	0.222234			0.0654	0.125962	0.0654	0.0603096			0.0654	0.0234032	0.0654	0.155206
				0.0656	0.808217	0.0656	0.714475			0.0656	0.399038	0.0656	0.22242			0.0656	0.126025	0.0656	0.0603631			0.0656	0.0234209	0.0656	0.155268
				0.0658	0.808921	0.0658	0.715006			0.0658	0.399432	0.0658	0.222607			0.0658	0.126089	0.0658	0.0604167			0.0658	0.0234387	0.0658	0.155329
				0.066	0.809625	0.066	0.715537			0.066	0.399826	0.066	0.222793			0.066	0.126153	0.066	0.0604704			0.066	0.0234565	0.066	0.155391
				0.0662	0.810329	0.0662	0.716069			0.0662	0.400221	0.0662	0.22298			0.0662	0.126217	0.0662	0.0605241			0.0662	0.0234743	0.0662	0.155452
				0.0664	0.811033	0.0664	0.7166			0.0664	0.400615	0.0664	0.223167			0.0664	0.126281	0.0664	0.0605778			0.0664	0.0234922	0.0664	0.155514
				0.0666	0.811738	0.0666	0.717131			0.0666	0.40101	0.0666	0.223354			0.0666	0.126344	0.0666	0.0606315			0.0666	0.02351	0.0666	0.155575
				0.0668	0.812443	0.0668	0.717662			0.0668	0.401406	0.0668	0.223541			0.0668	0.126408	0.0668	0.0606853			0.0668	0.0235278	0.0668	0.155637
				0.067	0.813148	0.067	0.718194			0.067	0.401801	0.067	0.223728			0.067	0.126472	0.067	0.0607391			0.067	0.0235457	0.067	0.155699
				0.0672	0.813853	0.0672	0.718725			0.0672	0.402197	0.0672	0.223915			0.0672	0.126536	0.0672	0.060793			0.0672	0.0235636	0.0672	0.15576
				0.0674	0.814558	0.0674	0.719257			0.0674	0.402593	0.0674	0.224102			0.0674	0.1266	0.0674	0.0608469			0.0674	0.0235815	0.0674	0.155822
				0.0676	0.815263	0.0676	0.719789			0.0676	0.402989	0.0676	0.22429			0.0676	0.126664	0.0676	0.0609009			0.0676	0.0235994	0.0676	0.155883
				0.0678	0.815968	0.0678	0.72032			0.0678	0.403385	0.0678	0.224477			0.0678	0.126728	0.0678	0.0609549			0.0678	0.0236173	0.0678	0.155945
				0.068	0.816674	0.068	0.720852			0.068	0.403781	0.068	0.224665			0.068	0.126792	0.068	0.0610089			0.068	0.0236352	0.068	0.156007
				0.0682	0.817379	0.0682	0.721384			0.0682	0.404178	0.0682	0.224852			0.0682	0.126856	0.0682	0.0610629			0.0682	0.0236531	0.0682	0.156068
				0.0684	0.818085	0.0684	0.721916			0.0684	0.404575	0.0684	0.22504			0.0684	0.12692	0.0684	0.061117			0.0684	0.023671	0.0684	0.15613
				0.0686	0.818791	0.0686	0.722448			0.0686	0.404972	0.0686	0.225228			0.0686	0.126984	0.0686	0.0611712			0.0686	0.023689	0.0686	0.156192
				0.0688	0.819497	0.0688	0.72298			0.0688	0.40537	0.0688	0.225416			0.0688	0.127048	0.0688	0.0612254			0.0688	0.023707	0.0688	0.156253
				0.069	0.820203	0.069	0.723512			0.069	0.405767	0.069	0.225604			0.069	0.127112	0.069	0.0612796			0.069	0.0237249	0.069	0.156315
				0.0692	0.820909	0.0692	0.724044			0.0692	0.406165	0.0692	0.225792			0.0692	0.127177	0.0692	0.0613338			0.0692	0.0237429	0.0692	0.156377
				0.0694	0.821615	0.0694	0.724577			0.0694	0.406563	0.0694	0.225981			0.0694	0.127241	0.0694	0.0613881			0.0694	0.0237609	0.0694	0.156438
				0.0696	0.822322	0.0696	0.725109			0.0696	0.406962	0.0696	0.226169			0.0696	0.127305	0.0696	0.0614425			0.0696	0.0237789	0.0696	0.1565
				0.0698	0.823028	0.0698	0.725641			0.0698	0.40736	0.0698	0.226358			0.0698	0.127369	0.0698	0.0614968			0.0698	0.0237969	0.0698	0.156562
				0.07	0.823735	0.07	0.726174			0.07	0.407759	0.07	0.226546			0.07	0.127433	0.07	0.0615512			0.07	0.023815	0.07	0.156624
				0.0702	0.824442	0.0702	0.726706			0.0702	0.408158	0.0702	0.226735			0.0702	0.127498	0.0702	0.0616057			0.0702	0.023833	0.0702	0.156685
				0.0704	0.825149	0.0704	0.727239			0.0704	0.408557	0.0704	0.226924			0.0704	0.127562	0.0704	0.0616602			0.0704	0.0238511	0.0704	0.156747
				0.0706	0.825856	0.0706	0.727772			0.0706	0.408956	0.0706	0.227113			0.0706	0.127626	0.0706	0.0617147			0.0706	0.0238691	0.0706	0.156809
				0.0708	0.826563	0.0708	0.728305			0.0708	0.409356	0.0708	0.227302			0.0708	0.12769	0.0708	0.0617693			0.0708	0.0238872	0.0708	0.156871
				0.071	0.82727	0.071	0.728837			0.071	0.409756	0.071	0.227491			0.071	0.127755	0.071	0.0618239			0.071	0.0239053	0.071	0.156933
				0.0712	0.827978	0.0712	0.72937			0.0712	0.410156	0.0712	0.22768			0.0712	0.127819	0.0712	0.0618785			0.0712	0.0239234	0.0712	0.156995
				0.0714	0.828685	0.0714	0.729903			0.0714	0.410556	0.0714	0.22787			0.0714	0.127884	0.0714	0.0619332			0.0714	0.0239415	0.0714	0.157057
				0.0716	0.829393	0.0716	0.730436			0.0716	0.410957	0.0716	0.228059			0.0716	0.127948	0.0716	0.0619879			0.0716	0.0239596	0.0716	0.157118
				0.0718	0.830101	0.0718	0.730969			0.0718	0.411357	0.0718	0.228249			0.0718	0.128012	0.0718	0.0620427			0.0718	0.0239778	0.0718	0.15718
				0.072	0.830808	0.072	0.731503			0.072	0.411758	0.072	0.228438			0.072	0.128077	0.072	0.0620975			0.072	0.0239959	0.072	0.157242
				0.0722	0.831516	0.0722	0.732036			0.0722	0.41216	0.0722	0.228628			0.0722	0.128141	0.0722	0.0621523			0.0722	0.0240141	0.0722	0.157304
				0.0724	0.832224	0.0724	0.732569			0.0724	0.412561	0.0724	0.228818			0.0724	0.128206	0.0724	0.0622072			0.0724	0.0240323	0.0724	0.157366
				0.0726	0.832933	0.0726	0.733102			0.0726	0.412963	0.0726	0.229008			0.0726	0.12827	0.0726	0.0622621			0.0726	0.0240504	0.0726	0.157428
				0.0728	0.833641	0.0728	0.733636			0.0728	0.413364	0.0728	0.229198			0.0728	0.128335	0.0728	0.062317			0.0728	0.0240686	0.0728	0.15749
				0.073	0.834349	0.073	0.734169			0.073	0.413766	0.073	0.229388			0.073	0.128399	0.073	0.062372			0.073	0.0240868	0.073	0.157552
				0.0732	0.835058	0.0732	0.734703			0.0732	0.414169	0.0732	0.229578			0.0732	0.128464	0.0732	0.062427			0.0732	0.0241051	0.0732	0.157614
				0.0734	0.835767	0.0734	0.735236			0.0734	0.414571	0.0734	0.229769			0.0734	0.128528	0.0734	0.0624821			0.0734	0.0241233	0.0734	0.157676
				0.0736	0.836475	0.0736	0.73577			0.0736	0.414974	0.0736	0.229959			0.0736	0.128593	0.0736	0.0625372			0.0736	0.0241415	0.0736	0.157738
				0.0738	0.837184	0.0738	0.736304			0.0738	0.415377	0.0738	0.23015			0.0738	0.128658	0.0738	0.0625924			0.0738	0.0241598	0.0738	0.1578
				0.074	0.837893	0.074	0.736837			0.074	0.41578	0.074	0.23034			0.074	0.128722	0.074	0.0626476			0.074	0.024178	0.074	0.157862
				0.0742	0.838602	0.0742	0.737371			0.0742	0.416183	0.0742	0.230531			0.0742	0.128787	0.0742	0.0627028			0.0742	0.0241963	0.0742	0.157924
				0.0744	0.839311	0.0744	0.737905			0.0744	0.416587	0.0744	0.230722			0.0744	0.128852	0.0744	0.062758			0.0744	0.0242146	0.0744	0.157986
				0.0746	0.84002	0.0746	0.738439			0.0746	0.41699	0.0746	0.230913			0.0746	0.128917	0.0746	0.0628133			0.0746	0.0242329	0.0746	0.158048
				0.0748	0.84073	0.0748	0.738973			0.0748	0.417394	0.0748	0.231104			0.0748	0.128981	0.0748	0.0628687			0.0748	0.0242512	0.0748	0.158111
				0.075	0.841439	0.075	0.739507			0.075	0.417799	0.075	0.231295			0.075	0.129046	0.075	0.0629241			0.075	0.0242695	0.075	0.158173
				0.0752	0.842149	0.0752	0.740041			0.0752	0.418203	0.0752	0.231487			0.0752	0.129111	0.0752	0.0629795			0.0752	0.0242879	0.0752	0.158235
				0.0754	0.842858	0.0754	0.740575			0.0754	0.418608	0.0754	0.231678			0.0754	0.129176	0.0754	0.0630349			0.0754	0.0243062	0.0754	0.158297
				0.0756	0.843568	0.0756	0.74111			0.0756	0.419013	0.0756	0.23187			0.0756	0.12924	0.0756	0.0630904			0.0756	0.0243246	0.0756	0.158359
				0.0758	0.844278	0.0758	0.741644			0.0758	0.419418	0.0758	0.232061			0.0758	0.129305	0.0758	0.063146			0.0758	0.0243429	0.0758	0.158421
				0.076	0.844988	0.076	0.742178			0.076	0.419823	0.076	0.232253			0.076	0.12937	0.076	0.0632016			0.076	0.0243613	0.076	0.158484
				0.0762	0.845698	0.0762	0.742713			0.0762	0.420229	0.0762	0.232445			0.0762	0.129435	0.0762	0.0632572			0.0762	0.0243797	0.0762	0.158546
				0.0764	0.846408	0.0764	0.743247			0.0764	0.420634	0.0764	0.232637			0.0764	0.1295	0.0764	0.0633128			0.0764	0.0243981	0.0764	0.158608
				0.0766	0.847118	0.0766	0.743782			0.0766	0.42104	0.0766	0.232829			0.0766	0.129565	0.0766	0.0633685			0.0766	0.0244165	0.0766	0.15867
				0.0768	0.847829	0.0768	0.744316			0.0768	0.421446	0.0768	0.233021			0.0768	0.12963	0.0768	0.0634243			0.0768	0.024435	0.0768	0.158732
				0.077	0.848539	0.077	0.744851			0.077	0.421853	0.077	0.233213			0.077	0.129695	0.077	0.06348			0.077	0.0244534	0.077	0.158795
				0.0772	0.84925	0.0772	0.745386			0.0772	0.422259	0.0772	0.233405			0.0772	0.12976	0.0772	0.0635358			0.0772	0.0244719	0.0772	0.158857
				0.0774	0.84996	0.0774	0.74592			0.0774	0.422666	0.0774	0.233598			0.0774	0.129825	0.0774	0.0635917			0.0774	0.0244903	0.0774	0.158919
				0.0776	0.850671	0.0776	0.746455			0.0776	0.423073	0.0776	0.23379			0.0776	0.12989	0.0776	0.0636476			0.0776	0.0245088	0.0776	0.158982
				0.0778	0.851382	0.0778	0.74699			0.0778	0.42348	0.0778	0.233983			0.0778	0.129955	0.0778	0.0637035			0.0778	0.0245273	0.0778	0.159044
				0.078	0.852093	0.078	0.747525			0.078	0.423888	0.078	0.234176			0.078	0.13002	0.078	0.0637595			0.078	0.0245458	0.078	0.159106
				0.0782	0.852803	0.0782	0.74806			0.0782	0.424296	0.0782	0.234369			0.0782	0.130085	0.0782	0.0638155			0.0782	0.0245643	0.0782	0.159169
				0.0784	0.853515	0.0784	0.748595			0.0784	0.424703	0.0784	0.234562			0.0784	0.13015	0.0784	0.0638715			0.0784	0.0245828	0.0784	0.159231
				0.0786	0.854226	0.0786	0.74913			0.0786	0.425112	0.0786	0.234755			0.0786	0.130216	0.0786	0.0639276			0.0786	0.0246013	0.0786	0.159293
				0.0788	0.854937	0.0788	0.749665			0.0788	0.42552	0.0788	0.234948			0.0788	0.130281	0.0788	0.0639837			0.0788	0.0246199	0.0788	0.159356
				0.079	0.855648	0.079	0.7502			0.079	0.425928	0.079	0.235141			0.079	0.130346	0.079	0.0640399			0.079	0.0246384	0.079	0.159418
				0.0792	0.85636	0.0792	0.750735			0.0792	0.426337	0.0792	0.235334			0.0792	0.130411	0.0792	0.0640961			0.0792	0.024657	0.0792	0.159481
				0.0794	0.857071	0.0794	0.75127			0.0794	0.426746	0.0794	0.235528			0.0794	0.130476	0.0794	0.0641524			0.0794	0.0246756	0.0794	0.159543
				0.0796	0.857783	0.0796	0.751805			0.0796	0.427155	0.0796	0.235722			0.0796	0.130542	0.0796	0.0642086			0.0796	0.0246942	0.0796	0.159606
				0.0798	0.858494	0.0798	0.752341			0.0798	0.427565	0.0798	0.235915			0.0798	0.130607	0.0798	0.064265			0.0798	0.0247128	0.0798	0.159668
				0.08	0.859206	0.08	0.752876			0.08	0.427974	0.08	0.236109			0.08	0.130672	0.08	0.0643213			0.08	0.0247314	0.08	0.15973
				0.0802	0.859918	0.0802	0.753411			0.0802	0.428384	0.0802	0.236303			0.0802	0.130738	0.0802	0.0643777			0.0802	0.02475	0.0802	0.159793
				0.0804	0.86063	0.0804	0.753947			0.0804	0.428794	0.0804	0.236497			0.0804	0.130803	0.0804	0.0644342			0.0804	0.0247687	0.0804	0.159855
				0.0806	0.861342	0.0806	0.754482			0.0806	0.429204	0.0806	0.236691			0.0806	0.130868	0.0806	0.0644907			0.0806	0.0247873	0.0806	0.159918
				0.0808	0.862054	0.0808	0.755018			0.0808	0.429615	0.0808	0.236885			0.0808	0.130934	0.0808	0.0645472			0.0808	0.024806	0.0808	0.159981
				0.081	0.862766	0.081	0.755554			0.081	0.430026	0.081	0.237079			0.081	0.130999	0.081	0.0646037			0.081	0.0248247	0.081	0.160043
				0.0812	0.863478	0.0812	0.756089			0.0812	0.430436	0.0812	0.237274			0.0812	0.131065	0.0812	0.0646603			0.0812	0.0248433	0.0812	0.160106
				0.0814	0.86419	0.0814	0.756625			0.0814	0.430848	0.0814	0.237468			0.0814	0.13113	0.0814	0.064717			0.0814	0.024862	0.0814	0.160168
				0.0816	0.864903	0.0816	0.757161			0.0816	0.431259	0.0816	0.237663			0.0816	0.131196	0.0816	0.0647737			0.0816	0.0248807	0.0816	0.160231
				0.0818	0.865615	0.0818	0.757696			0.0818	0.43167	0.0818	0.237858			0.0818	0.131261	0.0818	0.0648304			0.0818	0.0248995	0.0818	0.160293
				0.082	0.866328	0.082	0.758232			0.082	0.432082	0.082	0.238052			0.082	0.131327	0.082	0.0648871			0.082	0.0249182	0.082	0.160356
				0.0822	0.86704	0.0822	0.758768			0.0822	0.432494	0.0822	0.238247			0.0822	0.131392	0.0822	0.0649439			0.0822	0.0249369	0.0822	0.160419
				0.0824	0.867753	0.0824	0.759304			0.0824	0.432906	0.0824	0.238442			0.0824	0.131458	0.0824	0.0650008			0.0824	0.0249557	0.0824	0.160481
				0.0826	0.868466	0.0826	0.75984			0.0826	0.433319	0.0826	0.238637			0.0826	0.131523	0.0826	0.0650577			0.0826	0.0249745	0.0826	0.160544
				0.0828	0.869178	0.0828	0.760376			0.0828	0.433731	0.0828	0.238833			0.0828	0.131589	0.0828	0.0651146			0.0828	0.0249933	0.0828	0.160607
				0.083	0.869891	0.083	0.760912			0.083	0.434144	0.083	0.239028			0.083	0.131655	0.083	0.0651715			0.083	0.0250121	0.083	0.160669
				0.0832	0.870604	0.0832	0.761448			0.0832	0.434557	0.0832	0.239223			0.0832	0.13172	0.0832	0.0652285			0.0832	0.0250309	0.0832	0.160732
				0.0834	0.871317	0.0834	0.761984			0.0834	0.43497	0.0834	0.239419			0.0834	0.131786	0.0834	0.0652856			0.0834	0.0250497	0.0834	0.160795
				0.0836	0.87203	0.0836	0.76252			0.0836	0.435384	0.0836	0.239615			0.0836	0.131852	0.0836	0.0653427			0.0836	0.0250685	0.0836	0.160857
				0.0838	0.872743	0.0838	0.763056			0.0838	0.435797	0.0838	0.23981			0.0838	0.131917	0.0838	0.0653998			0.0838	0.0250873	0.0838	0.16092
				0.084	0.873457	0.084	0.763592			0.084	0.436211	0.084	0.240006			0.084	0.131983	0.084	0.0654569			0.084	0.0251062	0.084	0.160983
				0.0842	0.87417	0.0842	0.764129			0.0842	0.436625	0.0842	0.240202			0.0842	0.132049	0.0842	0.0655141			0.0842	0.0251251	0.0842	0.161046
				0.0844	0.874883	0.0844	0.764665			0.0844	0.43704	0.0844	0.240398			0.0844	0.132115	0.0844	0.0655714			0.0844	0.0251439	0.0844	0.161109
				0.0846	0.875597	0.0846	0.765201			0.0846	0.437454	0.0846	0.240594			0.0846	0.13218	0.0846	0.0656286			0.0846	0.0251628	0.0846	0.161171
				0.0848	0.87631	0.0848	0.765737			0.0848	0.437869	0.0848	0.240791			0.0848	0.132246	0.0848	0.065686			0.0848	0.0251817	0.0848	0.161234
				0.085	0.877024	0.085	0.766274			0.085	0.438284	0.085	0.240987			0.085	0.132312	0.085	0.0657433			0.085	0.0252006	0.085	0.161297
				0.0852	0.877737	0.0852	0.76681			0.0852	0.438699	0.0852	0.241183			0.0852	0.132378	0.0852	0.0658007			0.0852	0.0252196	0.0852	0.16136
				0.0854	0.878451	0.0854	0.767347			0.0854	0.439114	0.0854	0.24138			0.0854	0.132444	0.0854	0.0658581			0.0854	0.0252385	0.0854	0.161423
				0.0856	0.879165	0.0856	0.767883			0.0856	0.43953	0.0856	0.241577			0.0856	0.13251	0.0856	0.0659156			0.0856	0.0252575	0.0856	0.161486
				0.0858	0.879878	0.0858	0.76842			0.0858	0.439946	0.0858	0.241773			0.0858	0.132576	0.0858	0.0659731			0.0858	0.0252764	0.0858	0.161548
				0.086	0.880592	0.086	0.768956			0.086	0.440362	0.086	0.24197			0.086	0.132642	0.086	0.0660307			0.086	0.0252954	0.086	0.161611
				0.0862	0.881306	0.0862	0.769493			0.0862	0.440778	0.0862	0.242167			0.0862	0.132708	0.0862	0.0660883			0.0862	0.0253144	0.0862	0.161674
				0.0864	0.88202	0.0864	0.770029			0.0864	0.441194	0.0864	0.242364			0.0864	0.132774	0.0864	0.0661459			0.0864	0.0253334	0.0864	0.161737
				0.0866	0.882734	0.0866	0.770566			0.0866	0.441611	0.0866	0.242561			0.0866	0.13284	0.0866	0.0662036			0.0866	0.0253524	0.0866	0.1618
				0.0868	0.883448	0.0868	0.771103			0.0868	0.442027	0.0868	0.242759			0.0868	0.132906	0.0868	0.0662613			0.0868	0.0253714	0.0868	0.161863
				0.087	0.884162	0.087	0.771639			0.087	0.442444	0.087	0.242956			0.087	0.132972	0.087	0.0663191			0.087	0.0253904	0.087	0.161926
				0.0872	0.884876	0.0872	0.772176			0.0872	0.442862	0.0872	0.243154			0.0872	0.133038	0.0872	0.0663769			0.0872	0.0254095	0.0872	0.161989
				0.0874	0.88559	0.0874	0.772713			0.0874	0.443279	0.0874	0.243351			0.0874	0.133104	0.0874	0.0664347			0.0874	0.0254285	0.0874	0.162052
				0.0876	0.886305	0.0876	0.77325			0.0876	0.443697	0.0876	0.243549			0.0876	0.13317	0.0876	0.0664926			0.0876	0.0254476	0.0876	0.162115
				0.0878	0.887019	0.0878	0.773786			0.0878	0.444115	0.0878	0.243747			0.0878	0.133236	0.0878	0.0665505			0.0878	0.0254667	0.0878	0.162178
				0.088	0.887733	0.088	0.774323			0.088	0.444533	0.088	0.243945			0.088	0.133303	0.088	0.0666085			0.088	0.0254858	0.088	0.162241
				0.0882	0.888448	0.0882	0.77486			0.0882	0.444951	0.0882	0.244142			0.0882	0.133369	0.0882	0.0666665			0.0882	0.0255049	0.0882	0.162304
				0.0884	0.889162	0.0884	0.775397			0.0884	0.445369	0.0884	0.244341			0.0884	0.133435	0.0884	0.0667245			0.0884	0.025524	0.0884	0.162367
				0.0886	0.889877	0.0886	0.775934			0.0886	0.445788	0.0886	0.244539			0.0886	0.133501	0.0886	0.0667826			0.0886	0.0255431	0.0886	0.16243
				0.0888	0.890591	0.0888	0.776471			0.0888	0.446207	0.0888	0.244737			0.0888	0.133567	0.0888	0.0668407			0.0888	0.0255623	0.0888	0.162493
				0.089	0.891306	0.089	0.777008			0.089	0.446626	0.089	0.244935			0.089	0.133634	0.089	0.0668989			0.089	0.0255814	0.089	0.162556
				0.0892	0.892021	0.0892	0.777545			0.0892	0.447045	0.0892	0.245134			0.0892	0.1337	0.0892	0.0669571			0.0892	0.0256006	0.0892	0.162619
				0.0894	0.892735	0.0894	0.778082			0.0894	0.447465	0.0894	0.245333			0.0894	0.133766	0.0894	0.0670153			0.0894	0.0256198	0.0894	0.162683
				0.0896	0.89345	0.0896	0.778619			0.0896	0.447885	0.0896	0.245531			0.0896	0.133833	0.0896	0.0670736			0.0896	0.0256389	0.0896	0.162746
				0.0898	0.894165	0.0898	0.779156			0.0898	0.448305	0.0898	0.24573			0.0898	0.133899	0.0898	0.0671319			0.0898	0.0256581	0.0898	0.162809
				0.09	0.89488	0.09	0.779693			0.09	0.448725	0.09	0.245929			0.09	0.133966	0.09	0.0671903			0.09	0.0256774	0.09	0.162872
				0.0902	0.895594	0.0902	0.78023			0.0902	0.449145	0.0902	0.246128			0.0902	0.134032	0.0902	0.0672487			0.0902	0.0256966	0.0902	0.162935
				0.0904	0.896309	0.0904	0.780768			0.0904	0.449566	0.0904	0.246327			0.0904	0.134098	0.0904	0.0673071			0.0904	0.0257158	0.0904	0.162998
				0.0906	0.897024	0.0906	0.781305			0.0906	0.449986	0.0906	0.246526			0.0906	0.134165	0.0906	0.0673656			0.0906	0.0257351	0.0906	0.163062
				0.0908	0.897739	0.0908	0.781842			0.0908	0.450407	0.0908	0.246726			0.0908	0.134231	0.0908	0.0674241			0.0908	0.0257543	0.0908	0.163125
				0.091	0.898454	0.091	0.782379			0.091	0.450829	0.091	0.246925			0.091	0.134298	0.091	0.0674827			0.091	0.0257736	0.091	0.163188
				0.0912	0.899169	0.0912	0.782916			0.0912	0.45125	0.0912	0.247125			0.0912	0.134364	0.0912	0.0675413			0.0912	0.0257929	0.0912	0.163251
				0.0914	0.899885	0.0914	0.783454			0.0914	0.451672	0.0914	0.247324			0.0914	0.134431	0.0914	0.0675999			0.0914	0.0258122	0.0914	0.163315
				0.0916	0.9006	0.0916	0.783991			0.0916	0.452093	0.0916	0.247524			0.0916	0.134497	0.0916	0.0676586			0.0916	0.0258315	0.0916	0.163378
				0.0918	0.901315	0.0918	0.784528			0.0918	0.452515	0.0918	0.247724			0.0918	0.134564	0.0918	0.0677173			0.0918	0.0258508	0.0918	0.163441
				0.092	0.90203	0.092	0.785066			0.092	0.452938	0.092	0.247924			0.092	0.134631	0.092	0.0677761			0.092	0.0258702	0.092	0.163505
				0.0922	0.902745	0.0922	0.785603			0.0922	0.45336	0.0922	0.248124			0.0922	0.134697	0.0922	0.0678349			0.0922	0.0258895	0.0922	0.163568
				0.0924	0.903461	0.0924	0.78614			0.0924	0.453783	0.0924	0.248324			0.0924	0.134764	0.0924	0.0678938			0.0924	0.0259089	0.0924	0.163631
				0.0926	0.904176	0.0926	0.786678			0.0926	0.454205	0.0926	0.248524			0.0926	0.134831	0.0926	0.0679526			0.0926	0.0259282	0.0926	0.163695
				0.0928	0.904891	0.0928	0.787215			0.0928	0.454628	0.0928	0.248725			0.0928	0.134897	0.0928	0.0680116			0.0928	0.0259476	0.0928	0.163758
				0.093	0.905607	0.093	0.787753			0.093	0.455052	0.093	0.248925			0.093	0.134964	0.093	0.0680705			0.093	0.025967	0.093	0.163821
				0.0932	0.906322	0.0932	0.78829			0.0932	0.455475	0.0932	0.249126			0.0932	0.135031	0.0932	0.0681296			0.0932	0.0259864	0.0932	0.163885
				0.0934	0.907037	0.0934	0.788827			0.0934	0.455899	0.0934	0.249326			0.0934	0.135098	0.0934	0.0681886			0.0934	0.0260058	0.0934	0.163948
				0.0936	0.907753	0.0936	0.789365			0.0936	0.456322	0.0936	0.249527			0.0936	0.135164	0.0936	0.0682477			0.0936	0.0260253	0.0936	0.164012
				0.0938	0.908468	0.0938	0.789902			0.0938	0.456747	0.0938	0.249728			0.0938	0.135231	0.0938	0.0683068			0.0938	0.0260447	0.0938	0.164075
				0.094	0.909184	0.094	0.79044			0.094	0.457171	0.094	0.249929			0.094	0.135298	0.094	0.068366			0.094	0.0260642	0.094	0.164138
				0.0942	0.909899	0.0942	0.790977			0.0942	0.457595	0.0942	0.25013			0.0942	0.135365	0.0942	0.0684252			0.0942	0.0260836	0.0942	0.164202
				0.0944	0.910615	0.0944	0.791515			0.0944	0.45802	0.0944	0.250331			0.0944	0.135432	0.0944	0.0684845			0.0944	0.0261031	0.0944	0.164265
				0.0946	0.91133	0.0946	0.792052			0.0946	0.458445	0.0946	0.250532			0.0946	0.135499	0.0946	0.0685438			0.0946	0.0261226	0.0946	0.164329
				0.0948	0.912046	0.0948	0.79259			0.0948	0.45887	0.0948	0.250734			0.0948	0.135566	0.0948	0.0686031			0.0948	0.0261421	0.0948	0.164392
				0.095	0.912762	0.095	0.793128			0.095	0.459295	0.095	0.250935			0.095	0.135632	0.095	0.0686625			0.095	0.0261616	0.095	0.164456
				0.0952	0.913477	0.0952	0.793665			0.0952	0.45972	0.0952	0.251137			0.0952	0.135699	0.0952	0.0687219			0.0952	0.0261812	0.0952	0.164519
				0.0954	0.914193	0.0954	0.794203			0.0954	0.460146	0.0954	0.251338			0.0954	0.135766	0.0954	0.0687813			0.0954	0.0262007	0.0954	0.164583
				0.0956	0.914909	0.0956	0.79474			0.0956	0.460572	0.0956	0.25154			0.0956	0.135833	0.0956	0.0688408			0.0956	0.0262203	0.0956	0.164646
				0.0958	0.915624	0.0958	0.795278			0.0958	0.460998	0.0958	0.251742			0.0958	0.1359	0.0958	0.0689004			0.0958	0.0262398	0.0958	0.16471
				0.096	0.91634	0.096	0.795815			0.096	0.461424	0.096	0.251944			0.096	0.135967	0.096	0.06896			0.096	0.0262594	0.096	0.164774
				0.0962	0.917056	0.0962	0.796353			0.0962	0.461851	0.0962	0.252146			0.0962	0.136035	0.0962	0.0690196			0.0962	0.026279	0.0962	0.164837
				0.0964	0.917771	0.0964	0.796891			0.0964	0.462278	0.0964	0.252348			0.0964	0.136102	0.0964	0.0690793			0.0964	0.0262986	0.0964	0.164901
				0.0966	0.918487	0.0966	0.797428			0.0966	0.462704	0.0966	0.252551			0.0966	0.136169	0.0966	0.069139			0.0966	0.0263182	0.0966	0.164964
				0.0968	0.919203	0.0968	0.797966			0.0968	0.463131	0.0968	0.252753			0.0968	0.136236	0.0968	0.0691987			0.0968	0.0263379	0.0968	0.165028
				0.097	0.919919	0.097	0.798504			0.097	0.463559	0.097	0.252956			0.097	0.136303	0.097	0.0692585			0.097	0.0263575	0.097	0.165092
				0.0972	0.920635	0.0972	0.799041			0.0972	0.463986	0.0972	0.253158			0.0972	0.13637	0.0972	0.0693183			0.0972	0.0263771	0.0972	0.165155
				0.0974	0.92135	0.0974	0.799579			0.0974	0.464414	0.0974	0.253361			0.0974	0.136437	0.0974	0.0693782			0.0974	0.0263968	0.0974	0.165219
				0.0976	0.922066	0.0976	0.800117			0.0976	0.464842	0.0976	0.253564			0.0976	0.136505	0.0976	0.0694381			0.0976	0.0264165	0.0976	0.165283
				0.0978	0.922782	0.0978	0.800654			0.0978	0.46527	0.0978	0.253767			0.0978	0.136572	0.0978	0.069498			0.0978	0.0264362	0.0978	0.165347
				0.098	0.923498	0.098	0.801192			0.098	0.465698	0.098	0.25397			0.098	0.136639	0.098	0.069558			0.098	0.0264559	0.098	0.16541
				0.0982	0.924214	0.0982	0.80173			0.0982	0.466127	0.0982	0.254173			0.0982	0.136706	0.0982	0.0696181			0.0982	0.0264756	0.0982	0.165474
				0.0984	0.92493	0.0984	0.802267			0.0984	0.466555	0.0984	0.254376			0.0984	0.136774	0.0984	0.0696781			0.0984	0.0264953	0.0984	0.165538
				0.0986	0.925645	0.0986	0.802805			0.0986	0.466984	0.0986	0.254579			0.0986	0.136841	0.0986	0.0697382			0.0986	0.0265151	0.0986	0.165601
				0.0988	0.926361	0.0988	0.803343			0.0988	0.467413	0.0988	0.254783			0.0988	0.136908	0.0988	0.0697984			0.0988	0.0265348	0.0988	0.165665
				0.099	0.927077	0.099	0.803881			0.099	0.467843	0.099	0.254986			0.099	0.136976	0.099	0.0698586			0.099	0.0265546	0.099	0.165729
				0.0992	0.927793	0.0992	0.804418			0.0992	0.468272	0.0992	0.25519			0.0992	0.137043	0.0992	0.0699188			0.0992	0.0265743	0.0992	0.165793
				0.0994	0.928509	0.0994	0.804956			0.0994	0.468702	0.0994	0.255393			0.0994	0.137111	0.0994	0.0699791			0.0994	0.0265941	0.0994	0.165857
				0.0996	0.929225	0.0996	0.805494			0.0996	0.469132	0.0996	0.255597			0.0996	0.137178	0.0996	0.0700394			0.0996	0.0266139	0.0996	0.16592
				0.0998	0.929941	0.0998	0.806031			0.0998	0.469562	0.0998	0.255801			0.0998	0.137245	0.0998	0.0700998			0.0998	0.0266337	0.0998	0.165984
				0.1	0.930657	0.1	0.806569			0.1	0.469992	0.1	0.256005			0.1	0.137313	0.1	0.0701602			0.1	0.0266536	0.1	0.166048
				0.1002	0.931373	0.1002	0.807107			0.1002	0.470422	0.1002	0.256209			0.1002	0.13738	0.1002	0.0702206			0.1002	0.0266734	0.1002	0.166112
				0.1004	0.932088	0.1004	0.807645			0.1004	0.470853	0.1004	0.256414			0.1004	0.137448	0.1004	0.0702811			0.1004	0.0266933	0.1004	0.166176
				0.1006	0.932804	0.1006	0.808182			0.1006	0.471284	0.1006	0.256618			0.1006	0.137515	0.1006	0.0703416			0.1006	0.0267131	0.1006	0.16624
				0.1008	0.93352	0.1008	0.80872			0.1008	0.471715	0.1008	0.256822			0.1008	0.137583	0.1008	0.0704022			0.1008	0.026733	0.1008	0.166304
				0.101	0.934236	0.101	0.809258			0.101	0.472146	0.101	0.257027			0.101	0.137651	0.101	0.0704628			0.101	0.0267529	0.101	0.166368
				0.1012	0.934952	0.1012	0.809795			0.1012	0.472578	0.1012	0.257231			0.1012	0.137718	0.1012	0.0705235			0.1012	0.0267728	0.1012	0.166432
				0.1014	0.935668	0.1014	0.810333			0.1014	0.473009	0.1014	0.257436			0.1014	0.137786	0.1014	0.0705842			0.1014	0.0267927	0.1014	0.166496
				0.1016	0.936384	0.1016	0.810871			0.1016	0.473441	0.1016	0.257641			0.1016	0.137854	0.1016	0.0706449			0.1016	0.0268126	0.1016	0.16656
				0.1018	0.9371	0.1018	0.811408			0.1018	0.473873	0.1018	0.257846			0.1018	0.137921	0.1018	0.0707057			0.1018	0.0268326	0.1018	0.166624
				0.102	0.937815	0.102	0.811946			0.102	0.474306	0.102	0.258051			0.102	0.137989	0.102	0.0707665			0.102	0.0268525	0.102	0.166688
				0.1022	0.938531	0.1022	0.812484			0.1022	0.474738	0.1022	0.258256			0.1022	0.138057	0.1022	0.0708273			0.1022	0.0268725	0.1022	0.166752
				0.1024	0.939247	0.1024	0.813021			0.1024	0.475171	0.1024	0.258461			0.1024	0.138124	0.1024	0.0708882			0.1024	0.0268924	0.1024	0.166816
				0.1026	0.939963	0.1026	0.813559			0.1026	0.475604	0.1026	0.258667			0.1026	0.138192	0.1026	0.0709492			0.1026	0.0269124	0.1026	0.16688
				0.1028	0.940679	0.1028	0.814097			0.1028	0.476037	0.1028	0.258872			0.1028	0.13826	0.1028	0.0710102			0.1028	0.0269324	0.1028	0.166944
				0.103	0.941395	0.103	0.814635			0.103	0.47647	0.103	0.259078			0.103	0.138328	0.103	0.0710712			0.103	0.0269524	0.103	0.167008
				0.1032	0.94211	0.1032	0.815172			0.1032	0.476903	0.1032	0.259283			0.1032	0.138395	0.1032	0.0711322			0.1032	0.0269725	0.1032	0.167072
				0.1034	0.942826	0.1034	0.81571			0.1034	0.477337	0.1034	0.259489			0.1034	0.138463	0.1034	0.0711933			0.1034	0.0269925	0.1034	0.167136
				0.1036	0.943542	0.1036	0.816247			0.1036	0.477771	0.1036	0.259695			0.1036	0.138531	0.1036	0.0712545			0.1036	0.0270125	0.1036	0.1672
				0.1038	0.944258	0.1038	0.816785			0.1038	0.478205	0.1038	0.259901			0.1038	0.138599	0.1038	0.0713157			0.1038	0.0270326	0.1038	0.167264
				0.104	0.944973	0.104	0.817323			0.104	0.478639	0.104	0.260107			0.104	0.138667	0.104	0.0713769			0.104	0.0270527	0.104	0.167328
				0.1042	0.945689	0.1042	0.81786			0.1042	0.479073	0.1042	0.260313			0.1042	0.138735	0.1042	0.0714382			0.1042	0.0270728	0.1042	0.167392
				0.1044	0.946405	0.1044	0.818398			0.1044	0.479508	0.1044	0.260519			0.1044	0.138803	0.1044	0.0714995			0.1044	0.0270929	0.1044	0.167457
				0.1046	0.94712	0.1046	0.818936			0.1046	0.479943	0.1046	0.260726			0.1046	0.138871	0.1046	0.0715609			0.1046	0.027113	0.1046	0.167521
				0.1048	0.947836	0.1048	0.819473			0.1048	0.480378	0.1048	0.260932			0.1048	0.138939	0.1048	0.0716222			0.1048	0.0271331	0.1048	0.167585
				0.105	0.948552	0.105	0.820011			0.105	0.480813	0.105	0.261139			0.105	0.139007	0.105	0.0716837			0.105	0.0271532	0.105	0.167649
				0.1052	0.949267	0.1052	0.820548			0.1052	0.481248	0.1052	0.261345			0.1052	0.139075	0.1052	0.0717452			0.1052	0.0271734	0.1052	0.167713
				0.1054	0.949983	0.1054	0.821086			0.1054	0.481684	0.1054	0.261552			0.1054	0.139143	0.1054	0.0718067			0.1054	0.0271935	0.1054	0.167778
				0.1056	0.950698	0.1056	0.821623			0.1056	0.48212	0.1056	0.261759			0.1056	0.139211	0.1056	0.0718682			0.1056	0.0272137	0.1056	0.167842
				0.1058	0.951414	0.1058	0.822161			0.1058	0.482556	0.1058	0.261966			0.1058	0.139279	0.1058	0.0719299			0.1058	0.0272339	0.1058	0.167906
				0.106	0.952129	0.106	0.822698			0.106	0.482992	0.106	0.262173			0.106	0.139347	0.106	0.0719915			0.106	0.0272541	0.106	0.16797
				0.1062	0.952845	0.1062	0.823236			0.1062	0.483428	0.1062	0.26238			0.1062	0.139415	0.1062	0.0720532			0.1062	0.0272743	0.1062	0.168035
				0.1064	0.95356	0.1064	0.823773			0.1064	0.483865	0.1064	0.262588			0.1064	0.139484	0.1064	0.0721149			0.1064	0.0272945	0.1064	0.168099
				0.1066	0.954276	0.1066	0.824311			0.1066	0.484301	0.1066	0.262795			0.1066	0.139552	0.1066	0.0721767			0.1066	0.0273148	0.1066	0.168163
				0.1068	0.954991	0.1068	0.824848			0.1068	0.484738	0.1068	0.263002			0.1068	0.13962	0.1068	0.0722385			0.1068	0.027335	0.1068	0.168227
				0.107	0.955707	0.107	0.825386			0.107	0.485175	0.107	0.26321			0.107	0.139688	0.107	0.0723004			0.107	0.0273553	0.107	0.168292
				0.1072	0.956422	0.1072	0.825923			0.1072	0.485613	0.1072	0.263418			0.1072	0.139756	0.1072	0.0723623			0.1072	0.0273756	0.1072	0.168356
				0.1074	0.957137	0.1074	0.82646			0.1074	0.48605	0.1074	0.263625			0.1074	0.139825	0.1074	0.0724242			0.1074	0.0273959	0.1074	0.168421
				0.1076	0.957853	0.1076	0.826998			0.1076	0.486488	0.1076	0.263833			0.1076	0.139893	0.1076	0.0724862			0.1076	0.0274162	0.1076	0.168485
				0.1078	0.958568	0.1078	0.827535			0.1078	0.486926	0.1078	0.264041			0.1078	0.139961	0.1078	0.0725482			0.1078	0.0274365	0.1078	0.168549
				0.108	0.959283	0.108	0.828072			0.108	0.487364	0.108	0.264249			0.108	0.14003	0.108	0.0726103			0.108	0.0274568	0.108	0.168614
				0.1082	0.959998	0.1082	0.82861			0.1082	0.487802	0.1082	0.264458			0.1082	0.140098	0.1082	0.0726724			0.1082	0.0274771	0.1082	0.168678
				0.1084	0.960713	0.1084	0.829147			0.1084	0.488241	0.1084	0.264666			0.1084	0.140166	0.1084	0.0727345			0.1084	0.0274975	0.1084	0.168743
				0.1086	0.961429	0.1086	0.829684			0.1086	0.488679	0.1086	0.264874			0.1086	0.140235	0.1086	0.0727967			0.1086	0.0275178	0.1086	0.168807
				0.1088	0.962144	0.1088	0.830222			0.1088	0.489118	0.1088	0.265083			0.1088	0.140303	0.1088	0.0728589			0.1088	0.0275382	0.1088	0.168871
				0.109	0.962859	0.109	0.830759			0.109	0.489557	0.109	0.265291			0.109	0.140372	0.109	0.0729212			0.109	0.0275586	0.109	0.168936
				0.1092	0.963574	0.1092	0.831296			0.1092	0.489996	0.1092	0.2655			0.1092	0.14044	0.1092	0.0729835			0.1092	0.027579	0.1092	0.169
				0.1094	0.964289	0.1094	0.831833			0.1094	0.490436	0.1094	0.265709			0.1094	0.140509	0.1094	0.0730459			0.1094	0.0275994	0.1094	0.169065
				0.1096	0.965004	0.1096	0.83237			0.1096	0.490875	0.1096	0.265918			0.1096	0.140577	0.1096	0.0731083			0.1096	0.0276198	0.1096	0.169129
				0.1098	0.965718	0.1098	0.832908			0.1098	0.491315	0.1098	0.266127			0.1098	0.140646	0.1098	0.0731707			0.1098	0.0276403	0.1098	0.169194
				0.11	0.966433	0.11	0.833445			0.11	0.491755	0.11	0.266336			0.11	0.140714	0.11	0.0732332			0.11	0.0276607	0.11	0.169258
				0.1102	0.967148	0.1102	0.833982			0.1102	0.492195	0.1102	0.266545			0.1102	0.140783	0.1102	0.0732958			0.1102	0.0276812	0.1102	0.169323
				0.1104	0.967863	0.1104	0.834519			0.1104	0.492636	0.1104	0.266754			0.1104	0.140852	0.1104	0.0733583			0.1104	0.0277017	0.1104	0.169388
				0.1106	0.968578	0.1106	0.835056			0.1106	0.493076	0.1106	0.266964			0.1106	0.14092	0.1106	0.0734209			0.1106	0.0277222	0.1106	0.169452
				0.1108	0.969292	0.1108	0.835593			0.1108	0.493517	0.1108	0.267173			0.1108	0.140989	0.1108	0.0734836			0.1108	0.0277427	0.1108	0.169517
				0.111	0.970007	0.111	0.83613			0.111	0.493958	0.111	0.267383			0.111	0.141057	0.111	0.0735463			0.111	0.0277632	0.111	0.169581
				0.1112	0.970721	0.1112	0.836667			0.1112	0.494399	0.1112	0.267592			0.1112	0.141126	0.1112	0.073609			0.1112	0.0277837	0.1112	0.169646
				0.1114	0.971436	0.1114	0.837204			0.1114	0.49484	0.1114	0.267802			0.1114	0.141195	0.1114	0.0736718			0.1114	0.0278042	0.1114	0.169711
				0.1116	0.97215	0.1116	0.837741			0.1116	0.495282	0.1116	0.268012			0.1116	0.141264	0.1116	0.0737346			0.1116	0.0278248	0.1116	0.169775
				0.1118	0.972865	0.1118	0.838278			0.1118	0.495723	0.1118	0.268222			0.1118	0.141332	0.1118	0.0737975			0.1118	0.0278454	0.1118	0.16984
				0.112	0.973579	0.112	0.838814			0.112	0.496165	0.112	0.268432			0.112	0.141401	0.112	0.0738604			0.112	0.0278659	0.112	0.169905
				0.1122	0.974293	0.1122	0.839351			0.1122	0.496607	0.1122	0.268642			0.1122	0.14147	0.1122	0.0739233			0.1122	0.0278865	0.1122	0.169969
				0.1124	0.975008	0.1124	0.839888			0.1124	0.49705	0.1124	0.268853			0.1124	0.141539	0.1124	0.0739863			0.1124	0.0279071	0.1124	0.170034
				0.1126	0.975722	0.1126	0.840425			0.1126	0.497492	0.1126	0.269063			0.1126	0.141608	0.1126	0.0740494			0.1126	0.0279278	0.1126	0.170099
				0.1128	0.976436	0.1128	0.840962			0.1128	0.497935	0.1128	0.269274			0.1128	0.141676	0.1128	0.0741124			0.1128	0.0279484	0.1128	0.170163
				0.113	0.97715	0.113	0.841498			0.113	0.498377	0.113	0.269484			0.113	0.141745	0.113	0.0741756			0.113	0.027969	0.113	0.170228
				0.1132	0.977864	0.1132	0.842035			0.1132	0.49882	0.1132	0.269695			0.1132	0.141814	0.1132	0.0742387			0.1132	0.0279897	0.1132	0.170293
				0.1134	0.978578	0.1134	0.842572			0.1134	0.499264	0.1134	0.269906			0.1134	0.141883	0.1134	0.0743019			0.1134	0.0280103	0.1134	0.170358
				0.1136	0.979292	0.1136	0.843108			0.1136	0.499707	0.1136	0.270117			0.1136	0.141952	0.1136	0.0743652			0.1136	0.028031	0.1136	0.170422
				0.1138	0.980006	0.1138	0.843645			0.1138	0.50015	0.1138	0.270328			0.1138	0.142021	0.1138	0.0744285			0.1138	0.0280517	0.1138	0.170487
				0.114	0.98072	0.114	0.844181			0.114	0.500594	0.114	0.270539			0.114	0.14209	0.114	0.0744918			0.114	0.0280724	0.114	0.170552
				0.1142	0.981434	0.1142	0.844718			0.1142	0.501038	0.1142	0.27075			0.1142	0.142159	0.1142	0.0745552			0.1142	0.0280931	0.1142	0.170617
				0.1144	0.982147	0.1144	0.845254			0.1144	0.501482	0.1144	0.270961			0.1144	0.142228	0.1144	0.0746186			0.1144	0.0281139	0.1144	0.170682
				0.1146	0.982861	0.1146	0.845791			0.1146	0.501926	0.1146	0.271173			0.1146	0.142297	0.1146	0.074682			0.1146	0.0281346	0.1146	0.170746
				0.1148	0.983574	0.1148	0.846327			0.1148	0.502371	0.1148	0.271384			0.1148	0.142366	0.1148	0.0747455			0.1148	0.0281554	0.1148	0.170811
				0.115	0.984288	0.115	0.846864			0.115	0.502816	0.115	0.271596			0.115	0.142435	0.115	0.0748091			0.115	0.0281761	0.115	0.170876
				0.1152	0.985001	0.1152	0.8474			0.1152	0.50326	0.1152	0.271807			0.1152	0.142504	0.1152	0.0748727			0.1152	0.0281969	0.1152	0.170941
				0.1154	0.985715	0.1154	0.847936			0.1154	0.503705	0.1154	0.272019			0.1154	0.142574	0.1154	0.0749363			0.1154	0.0282177	0.1154	0.171006
				0.1156	0.986428	0.1156	0.848472			0.1156	0.504151	0.1156	0.272231			0.1156	0.142643	0.1156	0.0749999			0.1156	0.0282385	0.1156	0.171071
				0.1158	0.987141	0.1158	0.849009			0.1158	0.504596	0.1158	0.272443			0.1158	0.142712	0.1158	0.0750637			0.1158	0.0282593	0.1158	0.171136
				0.116	0.987854	0.116	0.849545			0.116	0.505042	0.116	0.272655			0.116	0.142781	0.116	0.0751274			0.116	0.0282802	0.116	0.171201
				0.1162	0.988568	0.1162	0.850081			0.1162	0.505487	0.1162	0.272867			0.1162	0.14285	0.1162	0.0751912			0.1162	0.028301	0.1162	0.171266
				0.1164	0.989281	0.1164	0.850617			0.1164	0.505933	0.1164	0.27308			0.1164	0.14292	0.1164	0.0752551			0.1164	0.0283219	0.1164	0.171331
				0.1166	0.989994	0.1166	0.851153			0.1166	0.506379	0.1166	0.273292			0.1166	0.142989	0.1166	0.0753189			0.1166	0.0283428	0.1166	0.171396
				0.1168	0.990706	0.1168	0.851689			0.1168	0.506826	0.1168	0.273505			0.1168	0.143058	0.1168	0.0753829			0.1168	0.0283636	0.1168	0.171461
				0.117	0.991419	0.117	0.852225			0.117	0.507272	0.117	0.273717			0.117	0.143127	0.117	0.0754468			0.117	0.0283845	0.117	0.171526
				0.1172	0.992132	0.1172	0.852761			0.1172	0.507719	0.1172	0.27393			0.1172	0.143197	0.1172	0.0755108			0.1172	0.0284055	0.1172	0.171591
				0.1174	0.992845	0.1174	0.853297			0.1174	0.508166	0.1174	0.274143			0.1174	0.143266	0.1174	0.0755749			0.1174	0.0284264	0.1174	0.171656
				0.1176	0.993557	0.1176	0.853833			0.1176	0.508613	0.1176	0.274356			0.1176	0.143336	0.1176	0.075639			0.1176	0.0284473	0.1176	0.171721
				0.1178	0.99427	0.1178	0.854369			0.1178	0.50906	0.1178	0.274569			0.1178	0.143405	0.1178	0.0757031			0.1178	0.0284683	0.1178	0.171786
				0.118	0.994982	0.118	0.854904			0.118	0.509507	0.118	0.274782			0.118	0.143474	0.118	0.0757673			0.118	0.0284892	0.118	0.171851
				0.1182	0.995694	0.1182	0.85544			0.1182	0.509955	0.1182	0.274995			0.1182	0.143544	0.1182	0.0758315			0.1182	0.0285102	0.1182	0.171916
				0.1184	0.996407	0.1184	0.855976			0.1184	0.510403	0.1184	0.275208			0.1184	0.143613	0.1184	0.0758958			0.1184	0.0285312	0.1184	0.171981
				0.1186	0.997119	0.1186	0.856511			0.1186	0.51085	0.1186	0.275422			0.1186	0.143683	0.1186	0.0759601			0.1186	0.0285522	0.1186	0.172046
				0.1188	0.997831	0.1188	0.857047			0.1188	0.511299	0.1188	0.275635			0.1188	0.143752	0.1188	0.0760245			0.1188	0.0285732	0.1188	0.172111
				0.119	0.998543	0.119	0.857582			0.119	0.511747	0.119	0.275849			0.119	0.143822	0.119	0.0760889			0.119	0.0285942	0.119	0.172176
				0.1192	0.999255	0.1192	0.858118			0.1192	0.512195	0.1192	0.276062			0.1192	0.143891	0.1192	0.0761533			0.1192	0.0286153	0.1192	0.172242
				0.1194	0.999967	0.1194	0.858653			0.1194	0.512644	0.1194	0.276276			0.1194	0.143961	0.1194	0.0762178			0.1194	0.0286363	0.1194	0.172307
				0.1196	1.00068	0.1196	0.859189			0.1196	0.513093	0.1196	0.27649			0.1196	0.144031	0.1196	0.0762823			0.1196	0.0286574	0.1196	0.172372
				0.1198	1.00139	0.1198	0.859724			0.1198	0.513542	0.1198	0.276704			0.1198	0.1441	0.1198	0.0763469			0.1198	0.0286785	0.1198	0.172437
				0.12	1.0021	0.12	0.860259			0.12	0.513991	0.12	0.276918			0.12	0.14417	0.12	0.0764115			0.12	0.0286996	0.12	0.172502
				0.1202	1.00281	0.1202	0.860795			0.1202	0.51444	0.1202	0.277132			0.1202	0.144239	0.1202	0.0764761			0.1202	0.0287207	0.1202	0.172568
				0.1204	1.00352	0.1204	0.86133			0.1204	0.51489	0.1204	0.277347			0.1204	0.144309	0.1204	0.0765408			0.1204	0.0287418	0.1204	0.172633
				0.1206	1.00424	0.1206	0.861865			0.1206	0.51534	0.1206	0.277561			0.1206	0.144379	0.1206	0.0766056			0.1206	0.0287629	0.1206	0.172698
				0.1208	1.00495	0.1208	0.8624			0.1208	0.51579	0.1208	0.277776			0.1208	0.144449	0.1208	0.0766703			0.1208	0.0287841	0.1208	0.172763
				0.121	1.00566	0.121	0.862935			0.121	0.51624	0.121	0.27799			0.121	0.144518	0.121	0.0767352			0.121	0.0288052	0.121	0.172829
				0.1212	1.00637	0.1212	0.86347			0.1212	0.51669	0.1212	0.278205			0.1212	0.144588	0.1212	0.0768			0.1212	0.0288264	0.1212	0.172894
				0.1214	1.00708	0.1214	0.864005			0.1214	0.51714	0.1214	0.27842			0.1214	0.144658	0.1214	0.0768649			0.1214	0.0288476	0.1214	0.172959
				0.1216	1.00779	0.1216	0.86454			0.1216	0.517591	0.1216	0.278635			0.1216	0.144728	0.1216	0.0769299			0.1216	0.0288688	0.1216	0.173024
				0.1218	1.0085	0.1218	0.865075			0.1218	0.518042	0.1218	0.27885			0.1218	0.144797	0.1218	0.0769949			0.1218	0.02889	0.1218	0.17309
				0.122	1.00921	0.122	0.86561			0.122	0.518493	0.122	0.279065			0.122	0.144867	0.122	0.0770599			0.122	0.0289112	0.122	0.173155
				0.1222	1.00992	0.1222	0.866144			0.1222	0.518944	0.1222	0.27928			0.1222	0.144937	0.1222	0.077125			0.1222	0.0289324	0.1222	0.173221
				0.1224	1.01063	0.1224	0.866679			0.1224	0.519395	0.1224	0.279495			0.1224	0.145007	0.1224	0.0771901			0.1224	0.0289537	0.1224	0.173286
				0.1226	1.01134	0.1226	0.867214			0.1226	0.519847	0.1226	0.279711			0.1226	0.145077	0.1226	0.0772553			0.1226	0.0289749	0.1226	0.173351
				0.1228	1.01205	0.1228	0.867748			0.1228	0.520298	0.1228	0.279926			0.1228	0.145147	0.1228	0.0773205			0.1228	0.0289962	0.1228	0.173417
				0.123	1.01276	0.123	0.868283			0.123	0.52075	0.123	0.280142			0.123	0.145217	0.123	0.0773858			0.123	0.0290175	0.123	0.173482
				0.1232	1.01347	0.1232	0.868817			0.1232	0.521202	0.1232	0.280357			0.1232	0.145287	0.1232	0.0774511			0.1232	0.0290388	0.1232	0.173547
				0.1234	1.01418	0.1234	0.869352			0.1234	0.521654	0.1234	0.280573			0.1234	0.145357	0.1234	0.0775164			0.1234	0.0290601	0.1234	0.173613
				0.1236	1.01489	0.1236	0.869886			0.1236	0.522107	0.1236	0.280789			0.1236	0.145427	0.1236	0.0775818			0.1236	0.0290814	0.1236	0.173678
				0.1238	1.0156	0.1238	0.87042			0.1238	0.522559	0.1238	0.281005			0.1238	0.145497	0.1238	0.0776472			0.1238	0.0291028	0.1238	0.173744
				0.124	1.01631	0.124	0.870954			0.124	0.523012	0.124	0.281221			0.124	0.145567	0.124	0.0777127			0.124	0.0291241	0.124	0.173809
				0.1242	1.01702	0.1242	0.871488			0.1242	0.523465	0.1242	0.281437			0.1242	0.145637	0.1242	0.0777782			0.1242	0.0291455	0.1242	0.173875
				0.1244	1.01773	0.1244	0.872023			0.1244	0.523918	0.1244	0.281654			0.1244	0.145707	0.1244	0.0778438			0.1244	0.0291669	0.1244	0.17394
				0.1246	1.01844	0.1246	0.872557			0.1246	0.524371	0.1246	0.28187			0.1246	0.145777	0.1246	0.0779094			0.1246	0.0291882	0.1246	0.174006
				0.1248	1.01915	0.1248	0.873091			0.1248	0.524825	0.1248	0.282087			0.1248	0.145847	0.1248	0.077975			0.1248	0.0292097	0.1248	0.174071
				0.125	1.01986	0.125	0.873625			0.125	0.525278	0.125	0.282303			0.125	0.145918	0.125	0.0780407			0.125	0.0292311	0.125	0.174137
				0.1252	1.02057	0.1252	0.874158			0.1252	0.525732	0.1252	0.28252			0.1252	0.145988	0.1252	0.0781064			0.1252	0.0292525	0.1252	0.174202
				0.1254	1.02128	0.1254	0.874692			0.1254	0.526186	0.1254	0.282737			0.1254	0.146058	0.1254	0.0781722			0.1254	0.0292739	0.1254	0.174268
				0.1256	1.02199	0.1256	0.875226			0.1256	0.52664	0.1256	0.282954			0.1256	0.146128	0.1256	0.078238			0.1256	0.0292954	0.1256	0.174334
				0.1258	1.0227	0.1258	0.87576			0.1258	0.527094	0.1258	0.283171			0.1258	0.146199	0.1258	0.0783039			0.1258	0.0293169	0.1258	0.174399
				0.126	1.0234	0.126	0.876293			0.126	0.527549	0.126	0.283388			0.126	0.146269	0.126	0.0783698			0.126	0.0293384	0.126	0.174465
				0.1262	1.02411	0.1262	0.876827			0.1262	0.528003	0.1262	0.283605			0.1262	0.146339	0.1262	0.0784357			0.1262	0.0293598	0.1262	0.17453
				0.1264	1.02482	0.1264	0.87736			0.1264	0.528458	0.1264	0.283822			0.1264	0.146409	0.1264	0.0785017			0.1264	0.0293814	0.1264	0.174596
				0.1266	1.02553	0.1266	0.877894			0.1266	0.528913	0.1266	0.28404			0.1266	0.14648	0.1266	0.0785678			0.1266	0.0294029	0.1266	0.174662
				0.1268	1.02624	0.1268	0.878427			0.1268	0.529368	0.1268	0.284257			0.1268	0.14655	0.1268	0.0786338			0.1268	0.0294244	0.1268	0.174727
				0.127	1.02695	0.127	0.87896			0.127	0.529824	0.127	0.284475			0.127	0.146621	0.127	0.0787			0.127	0.029446	0.127	0.174793
				0.1272	1.02765	0.1272	0.879493			0.1272	0.530279	0.1272	0.284692			0.1272	0.146691	0.1272	0.0787661			0.1272	0.0294675	0.1272	0.174859
				0.1274	1.02836	0.1274	0.880026			0.1274	0.530735	0.1274	0.28491			0.1274	0.146761	0.1274	0.0788323			0.1274	0.0294891	0.1274	0.174924
				0.1276	1.02907	0.1276	0.88056			0.1276	0.53119	0.1276	0.285128			0.1276	0.146832	0.1276	0.0788986			0.1276	0.0295107	0.1276	0.17499
				0.1278	1.02978	0.1278	0.881093			0.1278	0.531646	0.1278	0.285346			0.1278	0.146902	0.1278	0.0789649			0.1278	0.0295323	0.1278	0.175056
				0.128	1.03048	0.128	0.881625			0.128	0.532103	0.128	0.285564			0.128	0.146973	0.128	0.0790312			0.128	0.0295539	0.128	0.175121
				0.1282	1.03119	0.1282	0.882158			0.1282	0.532559	0.1282	0.285782			0.1282	0.147043	0.1282	0.0790976			0.1282	0.0295755	0.1282	0.175187
				0.1284	1.0319	0.1284	0.882691			0.1284	0.533015	0.1284	0.286			0.1284	0.147114	0.1284	0.079164			0.1284	0.0295972	0.1284	0.175253
				0.1286	1.03261	0.1286	0.883224			0.1286	0.533472	0.1286	0.286219			0.1286	0.147184	0.1286	0.0792305			0.1286	0.0296188	0.1286	0.175319
				0.1288	1.03331	0.1288	0.883756			0.1288	0.533929	0.1288	0.286437			0.1288	0.147255	0.1288	0.079297			0.1288	0.0296405	0.1288	0.175385
				0.129	1.03402	0.129	0.884289			0.129	0.534386	0.129	0.286656			0.129	0.147326	0.129	0.0793636			0.129	0.0296622	0.129	0.17545
				0.1292	1.03473	0.1292	0.884822			0.1292	0.534843	0.1292	0.286874			0.1292	0.147396	0.1292	0.0794302			0.1292	0.0296839	0.1292	0.175516
				0.1294	1.03543	0.1294	0.885354			0.1294	0.5353	0.1294	0.287093			0.1294	0.147467	0.1294	0.0794968			0.1294	0.0297056	0.1294	0.175582
				0.1296	1.03614	0.1296	0.885886			0.1296	0.535758	0.1296	0.287312			0.1296	0.147538	0.1296	0.0795635			0.1296	0.0297273	0.1296	0.175648
				0.1298	1.03684	0.1298	0.886419			0.1298	0.536216	0.1298	0.287531			0.1298	0.147608	0.1298	0.0796302			0.1298	0.029749	0.1298	0.175714
				0.13	1.03755	0.13	0.886951			0.13	0.536674	0.13	0.28775			0.13	0.147679	0.13	0.079697			0.13	0.0297708	0.13	0.17578
				0.1302	1.03826	0.1302	0.887483			0.1302	0.537132	0.1302	0.287969			0.1302	0.14775	0.1302	0.0797638			0.1302	0.0297925	0.1302	0.175845
				0.1304	1.03896	0.1304	0.888015			0.1304	0.53759	0.1304	0.288189			0.1304	0.147821	0.1304	0.0798307			0.1304	0.0298143	0.1304	0.175911
				0.1306	1.03967	0.1306	0.888547			0.1306	0.538048	0.1306	0.288408			0.1306	0.147891	0.1306	0.0798976			0.1306	0.0298361	0.1306	0.175977
				0.1308	1.04037	0.1308	0.889079			0.1308	0.538507	0.1308	0.288627			0.1308	0.147962	0.1308	0.0799645			0.1308	0.0298579	0.1308	0.176043
				0.131	1.04108	0.131	0.889611			0.131	0.538965	0.131	0.288847			0.131	0.148033	0.131	0.0800315			0.131	0.0298797	0.131	0.176109
				0.1312	1.04178	0.1312	0.890142			0.1312	0.539424	0.1312	0.289067			0.1312	0.148104	0.1312	0.0800986			0.1312	0.0299015	0.1312	0.176175
				0.1314	1.04249	0.1314	0.890674			0.1314	0.539883	0.1314	0.289286			0.1314	0.148175	0.1314	0.0801657			0.1314	0.0299234	0.1314	0.176241
				0.1316	1.04319	0.1316	0.891206			0.1316	0.540342	0.1316	0.289506			0.1316	0.148245	0.1316	0.0802328			0.1316	0.0299452	0.1316	0.176307
				0.1318	1.0439	0.1318	0.891737			0.1318	0.540802	0.1318	0.289726			0.1318	0.148316	0.1318	0.0803			0.1318	0.0299671	0.1318	0.176373
				0.132	1.0446	0.132	0.892269			0.132	0.541261	0.132	0.289946			0.132	0.148387	0.132	0.0803672			0.132	0.029989	0.132	0.176439
				0.1322	1.04531	0.1322	0.8928			0.1322	0.541721	0.1322	0.290166			0.1322	0.148458	0.1322	0.0804344			0.1322	0.0300108	0.1322	0.176505
				0.1324	1.04601	0.1324	0.893331			0.1324	0.542181	0.1324	0.290386			0.1324	0.148529	0.1324	0.0805017			0.1324	0.0300328	0.1324	0.176571
				0.1326	1.04672	0.1326	0.893863			0.1326	0.542641	0.1326	0.290607			0.1326	0.1486	0.1326	0.0805691			0.1326	0.0300547	0.1326	0.176637
				0.1328	1.04742	0.1328	0.894394			0.1328	0.543101	0.1328	0.290827			0.1328	0.148671	0.1328	0.0806365			0.1328	0.0300766	0.1328	0.176703
				0.133	1.04813	0.133	0.894925			0.133	0.543561	0.133	0.291048			0.133	0.148742	0.133	0.0807039			0.133	0.0300985	0.133	0.176769
				0.1332	1.04883	0.1332	0.895456			0.1332	0.544022	0.1332	0.291268			0.1332	0.148813	0.1332	0.0807714			0.1332	0.0301205	0.1332	0.176835
				0.1334	1.04953	0.1334	0.895986			0.1334	0.544482	0.1334	0.291489			0.1334	0.148884	0.1334	0.0808389			0.1334	0.0301425	0.1334	0.176901
				0.1336	1.05024	0.1336	0.896517			0.1336	0.544943	0.1336	0.29171			0.1336	0.148955	0.1336	0.0809065			0.1336	0.0301645	0.1336	0.176967
				0.1338	1.05094	0.1338	0.897048			0.1338	0.545404	0.1338	0.291931			0.1338	0.149027	0.1338	0.0809741			0.1338	0.0301865	0.1338	0.177034
				0.134	1.05164	0.134	0.897579			0.134	0.545865	0.134	0.292152			0.134	0.149098	0.134	0.0810417			0.134	0.0302085	0.134	0.1771
				0.1342	1.05235	0.1342	0.898109			0.1342	0.546327	0.1342	0.292373			0.1342	0.149169	0.1342	0.0811094			0.1342	0.0302305	0.1342	0.177166
				0.1344	1.05305	0.1344	0.89864			0.1344	0.546788	0.1344	0.292594			0.1344	0.14924	0.1344	0.0811772			0.1344	0.0302525	0.1344	0.177232
				0.1346	1.05375	0.1346	0.89917			0.1346	0.54725	0.1346	0.292816			0.1346	0.149311	0.1346	0.0812449			0.1346	0.0302746	0.1346	0.177298
				0.1348	1.05445	0.1348	0.8997			0.1348	0.547712	0.1348	0.293037			0.1348	0.149383	0.1348	0.0813128			0.1348	0.0302967	0.1348	0.177364
				0.135	1.05516	0.135	0.90023			0.135	0.548173	0.135	0.293258			0.135	0.149454	0.135	0.0813806			0.135	0.0303187	0.135	0.177431
				0.1352	1.05586	0.1352	0.90076			0.1352	0.548636	0.1352	0.29348			0.1352	0.149525	0.1352	0.0814486			0.1352	0.0303408	0.1352	0.177497
				0.1354	1.05656	0.1354	0.90129			0.1354	0.549098	0.1354	0.293702			0.1354	0.149596	0.1354	0.0815165			0.1354	0.0303629	0.1354	0.177563
				0.1356	1.05726	0.1356	0.90182			0.1356	0.54956	0.1356	0.293924			0.1356	0.149668	0.1356	0.0815845			0.1356	0.0303851	0.1356	0.177629
				0.1358	1.05797	0.1358	0.90235			0.1358	0.550023	0.1358	0.294145			0.1358	0.149739	0.1358	0.0816526			0.1358	0.0304072	0.1358	0.177695
				0.136	1.05867	0.136	0.90288			0.136	0.550486	0.136	0.294367			0.136	0.14981	0.136	0.0817207			0.136	0.0304293	0.136	0.177762
				0.1362	1.05937	0.1362	0.90341			0.1362	0.550949	0.1362	0.29459			0.1362	0.149882	0.1362	0.0817888			0.1362	0.0304515	0.1362	0.177828
				0.1364	1.06007	0.1364	0.903939			0.1364	0.551412	0.1364	0.294812			0.1364	0.149953	0.1364	0.081857			0.1364	0.0304737	0.1364	0.177894
				0.1366	1.06077	0.1366	0.904469			0.1366	0.551875	0.1366	0.295034			0.1366	0.150025	0.1366	0.0819252			0.1366	0.0304959	0.1366	0.177961
				0.1368	1.06147	0.1368	0.904998			0.1368	0.552338	0.1368	0.295256			0.1368	0.150096	0.1368	0.0819935			0.1368	0.0305181	0.1368	0.178027
				0.137	1.06217	0.137	0.905527			0.137	0.552802	0.137	0.295479			0.137	0.150167	0.137	0.0820618			0.137	0.0305403	0.137	0.178093
				0.1372	1.06287	0.1372	0.906056			0.1372	0.553266	0.1372	0.295701			0.1372	0.150239	0.1372	0.0821302			0.1372	0.0305625	0.1372	0.17816
				0.1374	1.06357	0.1374	0.906585			0.1374	0.55373	0.1374	0.295924			0.1374	0.15031	0.1374	0.0821986			0.1374	0.0305847	0.1374	0.178226
				0.1376	1.06427	0.1376	0.907114			0.1376	0.554194	0.1376	0.296147			0.1376	0.150382	0.1376	0.082267			0.1376	0.030607	0.1376	0.178292
				0.1378	1.06498	0.1378	0.907643			0.1378	0.554658	0.1378	0.29637			0.1378	0.150453	0.1378	0.0823355			0.1378	0.0306293	0.1378	0.178359
				0.138	1.06568	0.138	0.908172			0.138	0.555122	0.138	0.296593			0.138	0.150525	0.138	0.082404			0.138	0.0306515	0.138	0.178425
				0.1382	1.06637	0.1382	0.908701			0.1382	0.555587	0.1382	0.296816			0.1382	0.150597	0.1382	0.0824726			0.1382	0.0306738	0.1382	0.178491
				0.1384	1.06707	0.1384	0.90923			0.1384	0.556051	0.1384	0.297039			0.1384	0.150668	0.1384	0.0825413			0.1384	0.0306961	0.1384	0.178558
				0.1386	1.06777	0.1386	0.909758			0.1386	0.556516	0.1386	0.297262			0.1386	0.15074	0.1386	0.0826099			0.1386	0.0307185	0.1386	0.178624
				0.1388	1.06847	0.1388	0.910286			0.1388	0.556981	0.1388	0.297486			0.1388	0.150812	0.1388	0.0826786			0.1388	0.0307408	0.1388	0.178691
				0.139	1.06917	0.139	0.910815			0.139	0.557446	0.139	0.297709			0.139	0.150883	0.139	0.0827474			0.139	0.0307631	0.139	0.178757
				0.1392	1.06987	0.1392	0.911343			0.1392	0.557912	0.1392	0.297933			0.1392	0.150955	0.1392	0.0828162			0.1392	0.0307855	0.1392	0.178824
				0.1394	1.07057	0.1394	0.911871			0.1394	0.558377	0.1394	0.298156			0.1394	0.151027	0.1394	0.0828851			0.1394	0.0308079	0.1394	0.17889
				0.1396	1.07127	0.1396	0.912399			0.1396	0.558843	0.1396	0.29838			0.1396	0.151098	0.1396	0.0829539			0.1396	0.0308303	0.1396	0.178957
				0.1398	1.07197	0.1398	0.912927			0.1398	0.559308	0.1398	0.298604			0.1398	0.15117	0.1398	0.0830229			0.1398	0.0308527	0.1398	0.179023
				0.14	1.07267	0.14	0.913455			0.14	0.559774	0.14	0.298828			0.14	0.151242	0.14	0.0830919			0.14	0.0308751	0.14	0.17909
				0.1402	1.07336	0.1402	0.913983			0.1402	0.56024	0.1402	0.299052			0.1402	0.151314	0.1402	0.0831609			0.1402	0.0308975	0.1402	0.179156
				0.1404	1.07406	0.1404	0.91451			0.1404	0.560707	0.1404	0.299276			0.1404	0.151386	0.1404	0.08323			0.1404	0.0309199	0.1404	0.179223
				0.1406	1.07476	0.1406	0.915038			0.1406	0.561173	0.1406	0.2995			0.1406	0.151457	0.1406	0.0832991			0.1406	0.0309424	0.1406	0.179289
				0.1408	1.07546	0.1408	0.915565			0.1408	0.561639	0.1408	0.299725			0.1408	0.151529	0.1408	0.0833682			0.1408	0.0309649	0.1408	0.179356
				0.141	1.07615	0.141	0.916092			0.141	0.562106	0.141	0.299949			0.141	0.151601	0.141	0.0834374			0.141	0.0309874	0.141	0.179422
				0.1412	1.07685	0.1412	0.91662			0.1412	0.562573	0.1412	0.300173			0.1412	0.151673	0.1412	0.0835067			0.1412	0.0310099	0.1412	0.179489
				0.1414	1.07755	0.1414	0.917147			0.1414	0.56304	0.1414	0.300398			0.1414	0.151745	0.1414	0.083576			0.1414	0.0310324	0.1414	0.179556
				0.1416	1.07825	0.1416	0.917674			0.1416	0.563507	0.1416	0.300623			0.1416	0.151817	0.1416	0.0836453			0.1416	0.0310549	0.1416	0.179622
				0.1418	1.07894	0.1418	0.918201			0.1418	0.563974	0.1418	0.300848			0.1418	0.151889	0.1418	0.0837147			0.1418	0.0310774	0.1418	0.179689
				0.142	1.07964	0.142	0.918727			0.142	0.564442	0.142	0.301073			0.142	0.151961	0.142	0.0837841			0.142	0.0311	0.142	0.179756
				0.1422	1.08033	0.1422	0.919254			0.1422	0.564909	0.1422	0.301298			0.1422	0.152033	0.1422	0.0838536			0.1422	0.0311225	0.1422	0.179822
				0.1424	1.08103	0.1424	0.919781			0.1424	0.565377	0.1424	0.301523			0.1424	0.152105	0.1424	0.0839231			0.1424	0.0311451	0.1424	0.179889
				0.1426	1.08173	0.1426	0.920307			0.1426	0.565845	0.1426	0.301748			0.1426	0.152177	0.1426	0.0839927			0.1426	0.0311677	0.1426	0.179956
				0.1428	1.08242	0.1428	0.920834			0.1428	0.566313	0.1428	0.301973			0.1428	0.152249	0.1428	0.0840623			0.1428	0.0311903	0.1428	0.180022
				0.143	1.08312	0.143	0.92136			0.143	0.566781	0.143	0.302199			0.143	0.152321	0.143	0.0841319			0.143	0.0312129	0.143	0.180089
				0.1432	1.08381	0.1432	0.921886			0.1432	0.56725	0.1432	0.302424			0.1432	0.152393	0.1432	0.0842016			0.1432	0.0312356	0.1432	0.180156
				0.1434	1.08451	0.1434	0.922412			0.1434	0.567718	0.1434	0.30265			0.1434	0.152465	0.1434	0.0842714			0.1434	0.0312582	0.1434	0.180222
				0.1436	1.0852	0.1436	0.922938			0.1436	0.568187	0.1436	0.302875			0.1436	0.152538	0.1436	0.0843412			0.1436	0.0312809	0.1436	0.180289
				0.1438	1.0859	0.1438	0.923464			0.1438	0.568656	0.1438	0.303101			0.1438	0.15261	0.1438	0.084411			0.1438	0.0313035	0.1438	0.180356
				0.144	1.08659	0.144	0.923989			0.144	0.569125	0.144	0.303327			0.144	0.152682	0.144	0.0844809			0.144	0.0313262	0.144	0.180423
				0.1442	1.08729	0.1442	0.924515			0.1442	0.569594	0.1442	0.303553			0.1442	0.152754	0.1442	0.0845508			0.1442	0.0313489	0.1442	0.180489
				0.1444	1.08798	0.1444	0.925041			0.1444	0.570063	0.1444	0.303779			0.1444	0.152827	0.1444	0.0846207			0.1444	0.0313716	0.1444	0.180556
				0.1446	1.08867	0.1446	0.925566			0.1446	0.570533	0.1446	0.304005			0.1446	0.152899	0.1446	0.0846908			0.1446	0.0313944	0.1446	0.180623
				0.1448	1.08937	0.1448	0.926091			0.1448	0.571002	0.1448	0.304231			0.1448	0.152971	0.1448	0.0847608			0.1448	0.0314171	0.1448	0.18069
				0.145	1.09006	0.145	0.926616			0.145	0.571472	0.145	0.304458			0.145	0.153043	0.145	0.0848309			0.145	0.0314399	0.145	0.180757
				0.1452	1.09075	0.1452	0.927141			0.1452	0.571942	0.1452	0.304684			0.1452	0.153116	0.1452	0.0849011			0.1452	0.0314626	0.1452	0.180824
				0.1454	1.09145	0.1454	0.927666			0.1454	0.572412	0.1454	0.304911			0.1454	0.153188	0.1454	0.0849712			0.1454	0.0314854	0.1454	0.180891
				0.1456	1.09214	0.1456	0.928191			0.1456	0.572882	0.1456	0.305137			0.1456	0.15326	0.1456	0.0850415			0.1456	0.0315082	0.1456	0.180957
				0.1458	1.09283	0.1458	0.928716			0.1458	0.573352	0.1458	0.305364			0.1458	0.153333	0.1458	0.0851118			0.1458	0.031531	0.1458	0.181024
				0.146	1.09353	0.146	0.92924			0.146	0.573823	0.146	0.305591			0.146	0.153405	0.146	0.0851821			0.146	0.0315539	0.146	0.181091
				0.1462	1.09422	0.1462	0.929765			0.1462	0.574293	0.1462	0.305818			0.1462	0.153478	0.1462	0.0852524			0.1462	0.0315767	0.1462	0.181158
				0.1464	1.09491	0.1464	0.930289			0.1464	0.574764	0.1464	0.306045			0.1464	0.15355	0.1464	0.0853229			0.1464	0.0315995	0.1464	0.181225
				0.1466	1.0956	0.1466	0.930813			0.1466	0.575235	0.1466	0.306272			0.1466	0.153623	0.1466	0.0853933			0.1466	0.0316224	0.1466	0.181292
				0.1468	1.09629	0.1468	0.931337			0.1468	0.575706	0.1468	0.306499			0.1468	0.153695	0.1468	0.0854638			0.1468	0.0316453	0.1468	0.181359
				0.147	1.09699	0.147	0.931861			0.147	0.576177	0.147	0.306726			0.147	0.153768	0.147	0.0855344			0.147	0.0316682	0.147	0.181426
				0.1472	1.09768	0.1472	0.932385			0.1472	0.576648	0.1472	0.306954			0.1472	0.15384	0.1472	0.085605			0.1472	0.0316911	0.1472	0.181493
				0.1474	1.09837	0.1474	0.932909			0.1474	0.57712	0.1474	0.307181			0.1474	0.153913	0.1474	0.0856756			0.1474	0.031714	0.1474	0.18156
				0.1476	1.09906	0.1476	0.933433			0.1476	0.577591	0.1476	0.307409			0.1476	0.153985	0.1476	0.0857463			0.1476	0.0317369	0.1476	0.181627
				0.1478	1.09975	0.1478	0.933956			0.1478	0.578063	0.1478	0.307637			0.1478	0.154058	0.1478	0.085817			0.1478	0.0317599	0.1478	0.181694
				0.148	1.10044	0.148	0.934479			0.148	0.578535	0.148	0.307864			0.148	0.154131	0.148	0.0858878			0.148	0.0317828	0.148	0.181761
				0.1482	1.10113	0.1482	0.935003			0.1482	0.579007	0.1482	0.308092			0.1482	0.154203	0.1482	0.0859586			0.1482	0.0318058	0.1482	0.181828
				0.1484	1.10182	0.1484	0.935526			0.1484	0.579479	0.1484	0.30832			0.1484	0.154276	0.1484	0.0860295			0.1484	0.0318288	0.1484	0.181895
				0.1486	1.10251	0.1486	0.936049			0.1486	0.579952	0.1486	0.308548			0.1486	0.154349	0.1486	0.0861004			0.1486	0.0318518	0.1486	0.181962
				0.1488	1.1032	0.1488	0.936572			0.1488	0.580424	0.1488	0.308776			0.1488	0.154421	0.1488	0.0861713			0.1488	0.0318748	0.1488	0.182029
				0.149	1.10389	0.149	0.937094			0.149	0.580897	0.149	0.309005			0.149	0.154494	0.149	0.0862423			0.149	0.0318979	0.149	0.182096
				0.1492	1.10458	0.1492	0.937617			0.1492	0.58137	0.1492	0.309233			0.1492	0.154567	0.1492	0.0863134			0.1492	0.0319209	0.1492	0.182163
				0.1494	1.10526	0.1494	0.93814			0.1494	0.581842	0.1494	0.309462			0.1494	0.15464	0.1494	0.0863845			0.1494	0.031944	0.1494	0.182231
				0.1496	1.10595	0.1496	0.938662			0.1496	0.582316	0.1496	0.30969			0.1496	0.154713	0.1496	0.0864556			0.1496	0.031967	0.1496	0.182298
				0.1498	1.10664	0.1498	0.939184			0.1498	0.582789	0.1498	0.309919			0.1498	0.154785	0.1498	0.0865268			0.1498	0.0319901	0.1498	0.182365
				0.15	1.10733	0.15	0.939706			0.15	0.583262	0.15	0.310147			0.15	0.154858	0.15	0.086598			0.15	0.0320132	0.15	0.182432
				0.1502	1.10802	0.1502	0.940228			0.1502	0.583736	0.1502	0.310376			0.1502	0.154931	0.1502	0.0866693			0.1502	0.0320363	0.1502	0.182499
				0.1504	1.10871	0.1504	0.94075			0.1504	0.584209	0.1504	0.310605			0.1504	0.155004	0.1504	0.0867406			0.1504	0.0320595	0.1504	0.182566
				0.1506	1.10939	0.1506	0.941272			0.1506	0.584683	0.1506	0.310834			0.1506	0.155077	0.1506	0.086812			0.1506	0.0320826	0.1506	0.182634
				0.1508	1.11008	0.1508	0.941793			0.1508	0.585157	0.1508	0.311063			0.1508	0.15515	0.1508	0.0868834			0.1508	0.0321058	0.1508	0.182701
				0.151	1.11077	0.151	0.942315			0.151	0.585631	0.151	0.311293			0.151	0.155223	0.151	0.0869548			0.151	0.0321289	0.151	0.182768
				0.1512	1.11145	0.1512	0.942836			0.1512	0.586105	0.1512	0.311522			0.1512	0.155296	0.1512	0.0870263			0.1512	0.0321521	0.1512	0.182835
				0.1514	1.11214	0.1514	0.943358			0.1514	0.586579	0.1514	0.311751			0.1514	0.155369	0.1514	0.0870979			0.1514	0.0321753	0.1514	0.182902
				0.1516	1.11283	0.1516	0.943879			0.1516	0.587054	0.1516	0.311981			0.1516	0.155442	0.1516	0.0871695			0.1516	0.0321985	0.1516	0.18297
				0.1518	1.11351	0.1518	0.9444			0.1518	0.587528	0.1518	0.31221			0.1518	0.155515	0.1518	0.0872411			0.1518	0.0322217	0.1518	0.183037
				0.152	1.1142	0.152	0.94492			0.152	0.588003	0.152	0.31244			0.152	0.155588	0.152	0.0873128			0.152	0.032245	0.152	0.183104
				0.1522	1.11488	0.1522	0.945441			0.1522	0.588478	0.1522	0.31267			0.1522	0.155661	0.1522	0.0873845			0.1522	0.0322682	0.1522	0.183172
				0.1524	1.11557	0.1524	0.945962			0.1524	0.588953	0.1524	0.3129			0.1524	0.155734	0.1524	0.0874563			0.1524	0.0322915	0.1524	0.183239
				0.1526	1.11625	0.1526	0.946482			0.1526	0.589428	0.1526	0.31313			0.1526	0.155807	0.1526	0.0875281			0.1526	0.0323148	0.1526	0.183306
				0.1528	1.11694	0.1528	0.947002			0.1528	0.589903	0.1528	0.31336			0.1528	0.15588	0.1528	0.0876			0.1528	0.0323381	0.1528	0.183374
				0.153	1.11762	0.153	0.947522			0.153	0.590379	0.153	0.31359			0.153	0.155954	0.153	0.0876719			0.153	0.0323614	0.153	0.183441
				0.1532	1.11831	0.1532	0.948042			0.1532	0.590854	0.1532	0.31382			0.1532	0.156027	0.1532	0.0877438			0.1532	0.0323847	0.1532	0.183508
				0.1534	1.11899	0.1534	0.948562			0.1534	0.59133	0.1534	0.31405			0.1534	0.1561	0.1534	0.0878158			0.1534	0.032408	0.1534	0.183576
				0.1536	1.11968	0.1536	0.949082			0.1536	0.591806	0.1536	0.314281			0.1536	0.156173	0.1536	0.0878879			0.1536	0.0324314	0.1536	0.183643
				0.1538	1.12036	0.1538	0.949602			0.1538	0.592282	0.1538	0.314511			0.1538	0.156246	0.1538	0.08796			0.1538	0.0324547	0.1538	0.18371
				0.154	1.12104	0.154	0.950121			0.154	0.592758	0.154	0.314742			0.154	0.15632	0.154	0.0880321			0.154	0.0324781	0.154	0.183778
				0.1542	1.12173	0.1542	0.950641			0.1542	0.593234	0.1542	0.314973			0.1542	0.156393	0.1542	0.0881043			0.1542	0.0325015	0.1542	0.183845
				0.1544	1.12241	0.1544	0.95116			0.1544	0.593711	0.1544	0.315204			0.1544	0.156466	0.1544	0.0881765			0.1544	0.0325249	0.1544	0.183913
				0.1546	1.12309	0.1546	0.951679			0.1546	0.594187	0.1546	0.315434			0.1546	0.15654	0.1546	0.0882488			0.1546	0.0325483	0.1546	0.18398
				0.1548	1.12377	0.1548	0.952198			0.1548	0.594664	0.1548	0.315665			0.1548	0.156613	0.1548	0.0883211			0.1548	0.0325718	0.1548	0.184048
				0.155	1.12446	0.155	0.952716			0.155	0.595141	0.155	0.315897			0.155	0.156686	0.155	0.0883935			0.155	0.0325952	0.155	0.184115
				0.1552	1.12514	0.1552	0.953235			0.1552	0.595618	0.1552	0.316128			0.1552	0.15676	0.1552	0.0884659			0.1552	0.0326187	0.1552	0.184183
				0.1554	1.12582	0.1554	0.953754			0.1554	0.596095	0.1554	0.316359			0.1554	0.156833	0.1554	0.0885383			0.1554	0.0326421	0.1554	0.18425
				0.1556	1.1265	0.1556	0.954272			0.1556	0.596572	0.1556	0.31659			0.1556	0.156907	0.1556	0.0886108			0.1556	0.0326656	0.1556	0.184318
				0.1558	1.12718	0.1558	0.95479			0.1558	0.597049	0.1558	0.316822			0.1558	0.15698	0.1558	0.0886834			0.1558	0.0326891	0.1558	0.184385
				0.156	1.12786	0.156	0.955308			0.156	0.597527	0.156	0.317053			0.156	0.157054	0.156	0.088756			0.156	0.0327126	0.156	0.184453
				0.1562	1.12854	0.1562	0.955826			0.1562	0.598004	0.1562	0.317285			0.1562	0.157127	0.1562	0.0888286			0.1562	0.0327362	0.1562	0.18452
				0.1564	1.12922	0.1564	0.956344			0.1564	0.598482	0.1564	0.317517			0.1564	0.157201	0.1564	0.0889013			0.1564	0.0327597	0.1564	0.184588
				0.1566	1.1299	0.1566	0.956862			0.1566	0.59896	0.1566	0.317749			0.1566	0.157274	0.1566	0.088974			0.1566	0.0327833	0.1566	0.184655
				0.1568	1.13058	0.1568	0.957379			0.1568	0.599438	0.1568	0.317981			0.1568	0.157348	0.1568	0.0890468			0.1568	0.0328068	0.1568	0.184723
				0.157	1.13126	0.157	0.957896			0.157	0.599916	0.157	0.318213			0.157	0.157421	0.157	0.0891196			0.157	0.0328304	0.157	0.184791
				0.1572	1.13194	0.1572	0.958414			0.1572	0.600394	0.1572	0.318445			0.1572	0.157495	0.1572	0.0891925			0.1572	0.032854	0.1572	0.184858
				0.1574	1.13262	0.1574	0.958931			0.1574	0.600873	0.1574	0.318677			0.1574	0.157569	0.1574	0.0892654			0.1574	0.0328777	0.1574	0.184926
				0.1576	1.1333	0.1576	0.959447			0.1576	0.601351	0.1576	0.318909			0.1576	0.157642	0.1576	0.0893384			0.1576	0.0329013	0.1576	0.184994
				0.1578	1.13398	0.1578	0.959964			0.1578	0.60183	0.1578	0.319142			0.1578	0.157716	0.1578	0.0894114			0.1578	0.0329249	0.1578	0.185061
				0.158	1.13466	0.158	0.960481			0.158	0.602308	0.158	0.319374			0.158	0.15779	0.158	0.0894844			0.158	0.0329486	0.158	0.185129
				0.1582	1.13533	0.1582	0.960997			0.1582	0.602787	0.1582	0.319607			0.1582	0.157863	0.1582	0.0895575			0.1582	0.0329722	0.1582	0.185197
				0.1584	1.13601	0.1584	0.961514			0.1584	0.603266	0.1584	0.31984			0.1584	0.157937	0.1584	0.0896306			0.1584	0.0329959	0.1584	0.185264
				0.1586	1.13669	0.1586	0.96203			0.1586	0.603746	0.1586	0.320072			0.1586	0.158011	0.1586	0.0897038			0.1586	0.0330196	0.1586	0.185332
				0.1588	1.13737	0.1588	0.962546			0.1588	0.604225	0.1588	0.320305			0.1588	0.158085	0.1588	0.0897771			0.1588	0.0330433	0.1588	0.1854
				0.159	1.13804	0.159	0.963062			0.159	0.604704	0.159	0.320538			0.159	0.158158	0.159	0.0898504			0.159	0.0330671	0.159	0.185467
				0.1592	1.13872	0.1592	0.963577			0.1592	0.605184	0.1592	0.320771			0.1592	0.158232	0.1592	0.0899237			0.1592	0.0330908	0.1592	0.185535
				0.1594	1.1394	0.1594	0.964093			0.1594	0.605664	0.1594	0.321004			0.1594	0.158306	0.1594	0.0899971			0.1594	0.0331146	0.1594	0.185603
				0.1596	1.14007	0.1596	0.964608			0.1596	0.606143	0.1596	0.321238			0.1596	0.15838	0.1596	0.0900705			0.1596	0.0331383	0.1596	0.185671
				0.1598	1.14075	0.1598	0.965123			0.1598	0.606623	0.1598	0.321471			0.1598	0.158454	0.1598	0.0901439			0.1598	0.0331621	0.1598	0.185738
				0.16	1.14142	0.16	0.965639			0.16	0.607103	0.16	0.321704			0.16	0.158528	0.16	0.0902174			0.16	0.0331859	0.16	0.185806
				0.1602	1.1421	0.1602	0.966153			0.1602	0.607584	0.1602	0.321938			0.1602	0.158602	0.1602	0.090291			0.1602	0.0332097	0.1602	0.185874
				0.1604	1.14277	0.1604	0.966668			0.1604	0.608064	0.1604	0.322172			0.1604	0.158676	0.1604	0.0903646			0.1604	0.0332336	0.1604	0.185942
				0.1606	1.14345	0.1606	0.967183			0.1606	0.608544	0.1606	0.322405			0.1606	0.15875	0.1606	0.0904383			0.1606	0.0332574	0.1606	0.18601
				0.1608	1.14412	0.1608	0.967697			0.1608	0.609025	0.1608	0.322639			0.1608	0.158824	0.1608	0.0905119			0.1608	0.0332813	0.1608	0.186077
				0.161	1.1448	0.161	0.968212			0.161	0.609506	0.161	0.322873			0.161	0.158898	0.161	0.0905857			0.161	0.0333051	0.161	0.186145
				0.1612	1.14547	0.1612	0.968726			0.1612	0.609986	0.1612	0.323107			0.1612	0.158972	0.1612	0.0906595			0.1612	0.033329	0.1612	0.186213
				0.1614	1.14615	0.1614	0.96924			0.1614	0.610467	0.1614	0.323341			0.1614	0.159046	0.1614	0.0907333			0.1614	0.0333529	0.1614	0.186281
				0.1616	1.14682	0.1616	0.969754			0.1616	0.610948	0.1616	0.323575			0.1616	0.15912	0.1616	0.0908072			0.1616	0.0333768	0.1616	0.186349
				0.1618	1.14749	0.1618	0.970267			0.1618	0.61143	0.1618	0.323809			0.1618	0.159194	0.1618	0.0908811			0.1618	0.0334007	0.1618	0.186417
				0.162	1.14816	0.162	0.970781			0.162	0.611911	0.162	0.324044			0.162	0.159268	0.162	0.0909551			0.162	0.0334247	0.162	0.186485
				0.1622	1.14884	0.1622	0.971294			0.1622	0.612392	0.1622	0.324278			0.1622	0.159342	0.1622	0.0910291			0.1622	0.0334486	0.1622	0.186553
				0.1624	1.14951	0.1624	0.971807			0.1624	0.612874	0.1624	0.324513			0.1624	0.159416	0.1624	0.0911032			0.1624	0.0334726	0.1624	0.186621
				0.1626	1.15018	0.1626	0.97232			0.1626	0.613356	0.1626	0.324747			0.1626	0.15949	0.1626	0.0911773			0.1626	0.0334966	0.1626	0.186689
				0.1628	1.15085	0.1628	0.972833			0.1628	0.613837	0.1628	0.324982			0.1628	0.159565	0.1628	0.0912514			0.1628	0.0335206	0.1628	0.186757
				0.163	1.15152	0.163	0.973346			0.163	0.614319	0.163	0.325217			0.163	0.159639	0.163	0.0913256			0.163	0.0335446	0.163	0.186825
				0.1632	1.1522	0.1632	0.973858			0.1632	0.614801	0.1632	0.325452			0.1632	0.159713	0.1632	0.0913999			0.1632	0.0335686	0.1632	0.186893
				0.1634	1.15287	0.1634	0.974371			0.1634	0.615284	0.1634	0.325687			0.1634	0.159787	0.1634	0.0914742			0.1634	0.0335926	0.1634	0.186961
				0.1636	1.15354	0.1636	0.974883			0.1636	0.615766	0.1636	0.325922			0.1636	0.159862	0.1636	0.0915485			0.1636	0.0336167	0.1636	0.187029
				0.1638	1.15421	0.1638	0.975395			0.1638	0.616248	0.1638	0.326157			0.1638	0.159936	0.1638	0.0916229			0.1638	0.0336408	0.1638	0.187097
				0.164	1.15488	0.164	0.975907			0.164	0.616731	0.164	0.326393			0.164	0.16001	0.164	0.0916973			0.164	0.0336648	0.164	0.187165
				0.1642	1.15555	0.1642	0.976419			0.1642	0.617213	0.1642	0.326628			0.1642	0.160085	0.1642	0.0917718			0.1642	0.0336889	0.1642	0.187233
				0.1644	1.15621	0.1644	0.97693			0.1644	0.617696	0.1644	0.326863			0.1644	0.160159	0.1644	0.0918464			0.1644	0.033713	0.1644	0.187301
				0.1646	1.15688	0.1646	0.977442			0.1646	0.618179	0.1646	0.327099			0.1646	0.160233	0.1646	0.0919209			0.1646	0.0337372	0.1646	0.187369
				0.1648	1.15755	0.1648	0.977953			0.1648	0.618662	0.1648	0.327335			0.1648	0.160308	0.1648	0.0919956			0.1648	0.0337613	0.1648	0.187437
				0.165	1.15822	0.165	0.978464			0.165	0.619145	0.165	0.32757			0.165	0.160382	0.165	0.0920702			0.165	0.0337855	0.165	0.187505
				0.1652	1.15889	0.1652	0.978975			0.1652	0.619629	0.1652	0.327806			0.1652	0.160457	0.1652	0.0921449			0.1652	0.0338096	0.1652	0.187573
				0.1654	1.15956	0.1654	0.979486			0.1654	0.620112	0.1654	0.328042			0.1654	0.160531	0.1654	0.0922197			0.1654	0.0338338	0.1654	0.187641
				0.1656	1.16022	0.1656	0.979996			0.1656	0.620595	0.1656	0.328278			0.1656	0.160606	0.1656	0.0922945			0.1656	0.033858	0.1656	0.187709
				0.1658	1.16089	0.1658	0.980507			0.1658	0.621079	0.1658	0.328514			0.1658	0.16068	0.1658	0.0923693			0.1658	0.0338822	0.1658	0.187778
				0.166	1.16156	0.166	0.981017			0.166	0.621563	0.166	0.32875			0.166	0.160755	0.166	0.0924442			0.166	0.0339064	0.166	0.187846
				0.1662	1.16222	0.1662	0.981527			0.1662	0.622047	0.1662	0.328987			0.1662	0.160829	0.1662	0.0925192			0.1662	0.0339307	0.1662	0.187914
				0.1664	1.16289	0.1664	0.982037			0.1664	0.622531	0.1664	0.329223			0.1664	0.160904	0.1664	0.0925942			0.1664	0.0339549	0.1664	0.187982
				0.1666	1.16356	0.1666	0.982546			0.1666	0.623015	0.1666	0.32946			0.1666	0.160979	0.1666	0.0926692			0.1666	0.0339792	0.1666	0.18805
				0.1668	1.16422	0.1668	0.983056			0.1668	0.623499	0.1668	0.329696			0.1668	0.161053	0.1668	0.0927443			0.1668	0.0340035	0.1668	0.188119
				0.167	1.16489	0.167	0.983565			0.167	0.623983	0.167	0.329933			0.167	0.161128	0.167	0.0928194			0.167	0.0340278	0.167	0.188187
				0.1672	1.16555	0.1672	0.984074			0.1672	0.624468	0.1672	0.33017			0.1672	0.161203	0.1672	0.0928946			0.1672	0.0340521	0.1672	0.188255
				0.1674	1.16622	0.1674	0.984583			0.1674	0.624952	0.1674	0.330406			0.1674	0.161277	0.1674	0.0929698			0.1674	0.0340764	0.1674	0.188323
				0.1676	1.16688	0.1676	0.985092			0.1676	0.625437	0.1676	0.330643			0.1676	0.161352	0.1676	0.0930451			0.1676	0.0341007	0.1676	0.188392
				0.1678	1.16755	0.1678	0.985601			0.1678	0.625922	0.1678	0.33088			0.1678	0.161427	0.1678	0.0931204			0.1678	0.0341251	0.1678	0.18846
				0.168	1.16821	0.168	0.986109			0.168	0.626407	0.168	0.331117			0.168	0.161501	0.168	0.0931958			0.168	0.0341495	0.168	0.188528
				0.1682	1.16887	0.1682	0.986618			0.1682	0.626892	0.1682	0.331355			0.1682	0.161576	0.1682	0.0932712			0.1682	0.0341738	0.1682	0.188596
				0.1684	1.16954	0.1684	0.987126			0.1684	0.627377	0.1684	0.331592			0.1684	0.161651	0.1684	0.0933467			0.1684	0.0341982	0.1684	0.188665
				0.1686	1.1702	0.1686	0.987634			0.1686	0.627862	0.1686	0.331829			0.1686	0.161726	0.1686	0.0934222			0.1686	0.0342226	0.1686	0.188733
				0.1688	1.17086	0.1688	0.988142			0.1688	0.628347	0.1688	0.332067			0.1688	0.161801	0.1688	0.0934977			0.1688	0.0342471	0.1688	0.188801
				0.169	1.17152	0.169	0.988649			0.169	0.628833	0.169	0.332304			0.169	0.161875	0.169	0.0935733			0.169	0.0342715	0.169	0.18887
				0.1692	1.17219	0.1692	0.989157			0.1692	0.629318	0.1692	0.332542			0.1692	0.16195	0.1692	0.093649			0.1692	0.034296	0.1692	0.188938
				0.1694	1.17285	0.1694	0.989664			0.1694	0.629804	0.1694	0.33278			0.1694	0.162025	0.1694	0.0937247			0.1694	0.0343204	0.1694	0.189007
				0.1696	1.17351	0.1696	0.990171			0.1696	0.63029	0.1696	0.333018			0.1696	0.1621	0.1696	0.0938004			0.1696	0.0343449	0.1696	0.189075
				0.1698	1.17417	0.1698	0.990678			0.1698	0.630776	0.1698	0.333256			0.1698	0.162175	0.1698	0.0938762			0.1698	0.0343694	0.1698	0.189143
				0.17	1.17483	0.17	0.991184			0.17	0.631262	0.17	0.333494			0.17	0.16225	0.17	0.093952			0.17	0.0343939	0.17	0.189212
				0.1702	1.17549	0.1702	0.991691			0.1702	0.631748	0.1702	0.333732			0.1702	0.162325	0.1702	0.0940279			0.1702	0.0344184	0.1702	0.18928
				0.1704	1.17615	0.1704	0.992197			0.1704	0.632234	0.1704	0.33397			0.1704	0.1624	0.1704	0.0941038			0.1704	0.034443	0.1704	0.189349
				0.1706	1.17681	0.1706	0.992703			0.1706	0.632721	0.1706	0.334208			0.1706	0.162475	0.1706	0.0941798			0.1706	0.0344675	0.1706	0.189417
				0.1708	1.17747	0.1708	0.993209			0.1708	0.633207	0.1708	0.334447			0.1708	0.16255	0.1708	0.0942558			0.1708	0.0344921	0.1708	0.189485
				0.171	1.17813	0.171	0.993715			0.171	0.633694	0.171	0.334685			0.171	0.162625	0.171	0.0943319			0.171	0.0345167	0.171	0.189554
				0.1712	1.17879	0.1712	0.994221			0.1712	0.63418	0.1712	0.334924			0.1712	0.1627	0.1712	0.094408			0.1712	0.0345413	0.1712	0.189622
				0.1714	1.17944	0.1714	0.994726			0.1714	0.634667	0.1714	0.335162			0.1714	0.162775	0.1714	0.0944841			0.1714	0.0345659	0.1714	0.189691
				0.1716	1.1801	0.1716	0.995231			0.1716	0.635154	0.1716	0.335401			0.1716	0.162851	0.1716	0.0945604			0.1716	0.0345905	0.1716	0.189759
				0.1718	1.18076	0.1718	0.995736			0.1718	0.635641	0.1718	0.33564			0.1718	0.162926	0.1718	0.0946366			0.1718	0.0346152	0.1718	0.189828
				0.172	1.18142	0.172	0.996241			0.172	0.636128	0.172	0.335879			0.172	0.163001	0.172	0.0947129			0.172	0.0346398	0.172	0.189897
				0.1722	1.18207	0.1722	0.996746			0.1722	0.636616	0.1722	0.336118			0.1722	0.163076	0.1722	0.0947893			0.1722	0.0346645	0.1722	0.189965
				0.1724	1.18273	0.1724	0.997251			0.1724	0.637103	0.1724	0.336357			0.1724	0.163151	0.1724	0.0948656			0.1724	0.0346892	0.1724	0.190034
				0.1726	1.18339	0.1726	0.997755			0.1726	0.63759	0.1726	0.336596			0.1726	0.163227	0.1726	0.0949421			0.1726	0.0347139	0.1726	0.190102
				0.1728	1.18404	0.1728	0.998259			0.1728	0.638078	0.1728	0.336835			0.1728	0.163302	0.1728	0.0950186			0.1728	0.0347386	0.1728	0.190171
				0.173	1.1847	0.173	0.998763			0.173	0.638566	0.173	0.337075			0.173	0.163377	0.173	0.0950951			0.173	0.0347633	0.173	0.190239
				0.1732	1.18535	0.1732	0.999267			0.1732	0.639053	0.1732	0.337314			0.1732	0.163452	0.1732	0.0951717			0.1732	0.0347881	0.1732	0.190308
				0.1734	1.18601	0.1734	0.99977			0.1734	0.639541	0.1734	0.337554			0.1734	0.163528	0.1734	0.0952483			0.1734	0.0348128	0.1734	0.190377
				0.1736	1.18666	0.1736	1.00027			0.1736	0.640029	0.1736	0.337793			0.1736	0.163603	0.1736	0.095325			0.1736	0.0348376	0.1736	0.190445
				0.1738	1.18732	0.1738	1.00078			0.1738	0.640517	0.1738	0.338033			0.1738	0.163678	0.1738	0.0954017			0.1738	0.0348624	0.1738	0.190514
				0.174	1.18797	0.174	1.00128			0.174	0.641006	0.174	0.338273			0.174	0.163754	0.174	0.0954785			0.174	0.0348872	0.174	0.190583
				0.1742	1.18863	0.1742	1.00178			0.1742	0.641494	0.1742	0.338513			0.1742	0.163829	0.1742	0.0955553			0.1742	0.034912	0.1742	0.190651
				0.1744	1.18928	0.1744	1.00228			0.1744	0.641982	0.1744	0.338753			0.1744	0.163905	0.1744	0.0956322			0.1744	0.0349368	0.1744	0.19072
				0.1746	1.18993	0.1746	1.00279			0.1746	0.642471	0.1746	0.338993			0.1746	0.16398	0.1746	0.0957091			0.1746	0.0349617	0.1746	0.190789
				0.1748	1.19058	0.1748	1.00329			0.1748	0.642959	0.1748	0.339233			0.1748	0.164056	0.1748	0.095786			0.1748	0.0349865	0.1748	0.190857
				0.175	1.19124	0.175	1.00379			0.175	0.643448	0.175	0.339473			0.175	0.164131	0.175	0.0958631			0.175	0.0350114	0.175	0.190926
				0.1752	1.19189	0.1752	1.00429			0.1752	0.643937	0.1752	0.339714			0.1752	0.164207	0.1752	0.0959401			0.1752	0.0350363	0.1752	0.190995
				0.1754	1.19254	0.1754	1.00479			0.1754	0.644426	0.1754	0.339954			0.1754	0.164282	0.1754	0.0960172			0.1754	0.0350612	0.1754	0.191064
				0.1756	1.19319	0.1756	1.0053			0.1756	0.644915	0.1756	0.340195			0.1756	0.164358	0.1756	0.0960944			0.1756	0.0350861	0.1756	0.191132
				0.1758	1.19384	0.1758	1.0058			0.1758	0.645404	0.1758	0.340435			0.1758	0.164433	0.1758	0.0961715			0.1758	0.035111	0.1758	0.191201
				0.176	1.19449	0.176	1.0063			0.176	0.645893	0.176	0.340676			0.176	0.164509	0.176	0.0962488			0.176	0.035136	0.176	0.19127
				0.1762	1.19514	0.1762	1.0068			0.1762	0.646383	0.1762	0.340917			0.1762	0.164584	0.1762	0.0963261			0.1762	0.0351609	0.1762	0.191339
				0.1764	1.19579	0.1764	1.0073			0.1764	0.646872	0.1764	0.341158			0.1764	0.16466	0.1764	0.0964034			0.1764	0.0351859	0.1764	0.191407
				0.1766	1.19644	0.1766	1.0078			0.1766	0.647362	0.1766	0.341399			0.1766	0.164736	0.1766	0.0964808			0.1766	0.0352109	0.1766	0.191476
				0.1768	1.19709	0.1768	1.0083			0.1768	0.647851	0.1768	0.34164			0.1768	0.164811	0.1768	0.0965582			0.1768	0.0352359	0.1768	0.191545
				0.177	1.19774	0.177	1.0088			0.177	0.648341	0.177	0.341881			0.177	0.164887	0.177	0.0966357			0.177	0.0352609	0.177	0.191614
				0.1772	1.19839	0.1772	1.0093			0.1772	0.648831	0.1772	0.342122			0.1772	0.164963	0.1772	0.0967132			0.1772	0.0352859	0.1772	0.191683
				0.1774	1.19904	0.1774	1.0098			0.1774	0.649321	0.1774	0.342364			0.1774	0.165038	0.1774	0.0967908			0.1774	0.035311	0.1774	0.191752
				0.1776	1.19968	0.1776	1.0103			0.1776	0.649811	0.1776	0.342605			0.1776	0.165114	0.1776	0.0968684			0.1776	0.0353361	0.1776	0.19182
				0.1778	1.20033	0.1778	1.0108			0.1778	0.650301	0.1778	0.342847			0.1778	0.16519	0.1778	0.0969461			0.1778	0.0353611	0.1778	0.191889
				0.178	1.20098	0.178	1.0113			0.178	0.650791	0.178	0.343088			0.178	0.165266	0.178	0.0970238			0.178	0.0353862	0.178	0.191958
				0.1782	1.20162	0.1782	1.0118			0.1782	0.651282	0.1782	0.34333			0.1782	0.165342	0.1782	0.0971016			0.1782	0.0354113	0.1782	0.192027
				0.1784	1.20227	0.1784	1.0123			0.1784	0.651772	0.1784	0.343572			0.1784	0.165417	0.1784	0.0971794			0.1784	0.0354365	0.1784	0.192096
				0.1786	1.20292	0.1786	1.01279			0.1786	0.652263	0.1786	0.343814			0.1786	0.165493	0.1786	0.0972572			0.1786	0.0354616	0.1786	0.192165
				0.1788	1.20356	0.1788	1.01329			0.1788	0.652753	0.1788	0.344056			0.1788	0.165569	0.1788	0.0973351			0.1788	0.0354867	0.1788	0.192234
				0.179	1.20421	0.179	1.01379			0.179	0.653244	0.179	0.344298			0.179	0.165645	0.179	0.0974131			0.179	0.0355119	0.179	0.192303
				0.1792	1.20485	0.1792	1.01429			0.1792	0.653735	0.1792	0.34454			0.1792	0.165721	0.1792	0.0974911			0.1792	0.0355371	0.1792	0.192372
				0.1794	1.20549	0.1794	1.01478			0.1794	0.654226	0.1794	0.344782			0.1794	0.165797	0.1794	0.0975691			0.1794	0.0355623	0.1794	0.192441
				0.1796	1.20614	0.1796	1.01528			0.1796	0.654717	0.1796	0.345024			0.1796	0.165873	0.1796	0.0976472			0.1796	0.0355875	0.1796	0.19251
				0.1798	1.20678	0.1798	1.01578			0.1798	0.655208	0.1798	0.345267			0.1798	0.165949	0.1798	0.0977254			0.1798	0.0356127	0.1798	0.192579
				0.18	1.20743	0.18	1.01628			0.18	0.655699	0.18	0.345509			0.18	0.166025	0.18	0.0978036			0.18	0.0356379	0.18	0.192648
				0.1802	1.20807	0.1802	1.01677			0.1802	0.65619	0.1802	0.345752			0.1802	0.166101	0.1802	0.0978818			0.1802	0.0356632	0.1802	0.192717
				0.1804	1.20871	0.1804	1.01727			0.1804	0.656682	0.1804	0.345994			0.1804	0.166177	0.1804	0.0979601			0.1804	0.0356885	0.1804	0.192786
				0.1806	1.20935	0.1806	1.01777			0.1806	0.657173	0.1806	0.346237			0.1806	0.166253	0.1806	0.0980384			0.1806	0.0357138	0.1806	0.192855
				0.1808	1.20999	0.1808	1.01826			0.1808	0.657665	0.1808	0.34648			0.1808	0.166329	0.1808	0.0981168			0.1808	0.035739	0.1808	0.192924
				0.181	1.21064	0.181	1.01876			0.181	0.658157	0.181	0.346723			0.181	0.166405	0.181	0.0981952			0.181	0.0357644	0.181	0.192993
				0.1812	1.21128	0.1812	1.01925			0.1812	0.658648	0.1812	0.346966			0.1812	0.166481	0.1812	0.0982737			0.1812	0.0357897	0.1812	0.193062
				0.1814	1.21192	0.1814	1.01975			0.1814	0.65914	0.1814	0.347209			0.1814	0.166558	0.1814	0.0983522			0.1814	0.035815	0.1814	0.193131
				0.1816	1.21256	0.1816	1.02024			0.1816	0.659632	0.1816	0.347452			0.1816	0.166634	0.1816	0.0984308			0.1816	0.0358404	0.1816	0.193201
				0.1818	1.2132	0.1818	1.02074			0.1818	0.660124	0.1818	0.347696			0.1818	0.16671	0.1818	0.0985094			0.1818	0.0358658	0.1818	0.19327
				0.182	1.21384	0.182	1.02123			0.182	0.660617	0.182	0.347939			0.182	0.166786	0.182	0.0985881			0.182	0.0358911	0.182	0.193339
				0.1822	1.21448	0.1822	1.02173			0.1822	0.661109	0.1822	0.348182			0.1822	0.166862	0.1822	0.0986668			0.1822	0.0359165	0.1822	0.193408
				0.1824	1.21511	0.1824	1.02222			0.1824	0.661601	0.1824	0.348426			0.1824	0.166939	0.1824	0.0987455			0.1824	0.035942	0.1824	0.193477
				0.1826	1.21575	0.1826	1.02272			0.1826	0.662094	0.1826	0.34867			0.1826	0.167015	0.1826	0.0988243			0.1826	0.0359674	0.1826	0.193546
				0.1828	1.21639	0.1828	1.02321			0.1828	0.662586	0.1828	0.348913			0.1828	0.167091	0.1828	0.0989032			0.1828	0.0359928	0.1828	0.193616
				0.183	1.21703	0.183	1.02371			0.183	0.663079	0.183	0.349157			0.183	0.167168	0.183	0.0989821			0.183	0.0360183	0.183	0.193685
				0.1832	1.21767	0.1832	1.0242			0.1832	0.663571	0.1832	0.349401			0.1832	0.167244	0.1832	0.0990611			0.1832	0.0360438	0.1832	0.193754
				0.1834	1.2183	0.1834	1.02469			0.1834	0.664064	0.1834	0.349645			0.1834	0.16732	0.1834	0.0991401			0.1834	0.0360693	0.1834	0.193823
				0.1836	1.21894	0.1836	1.02519			0.1836	0.664557	0.1836	0.349889			0.1836	0.167397	0.1836	0.0992191			0.1836	0.0360948	0.1836	0.193892
				0.1838	1.21957	0.1838	1.02568			0.1838	0.66505	0.1838	0.350133			0.1838	0.167473	0.1838	0.0992982			0.1838	0.0361203	0.1838	0.193962
				0.184	1.22021	0.184	1.02617			0.184	0.665543	0.184	0.350377			0.184	0.16755	0.184	0.0993773			0.184	0.0361458	0.184	0.194031
				0.1842	1.22084	0.1842	1.02666			0.1842	0.666036	0.1842	0.350622			0.1842	0.167626	0.1842	0.0994565			0.1842	0.0361714	0.1842	0.1941
				0.1844	1.22148	0.1844	1.02716			0.1844	0.666529	0.1844	0.350866			0.1844	0.167702	0.1844	0.0995358			0.1844	0.0361969	0.1844	0.19417
				0.1846	1.22211	0.1846	1.02765			0.1846	0.667023	0.1846	0.351111			0.1846	0.167779	0.1846	0.099615			0.1846	0.0362225	0.1846	0.194239
				0.1848	1.22275	0.1848	1.02814			0.1848	0.667516	0.1848	0.351355			0.1848	0.167855	0.1848	0.0996944			0.1848	0.0362481	0.1848	0.194308
				0.185	1.22338	0.185	1.02863			0.185	0.66801	0.185	0.3516			0.185	0.167932	0.185	0.0997738			0.185	0.0362737	0.185	0.194377
				0.1852	1.22401	0.1852	1.02912			0.1852	0.668503	0.1852	0.351845			0.1852	0.168009	0.1852	0.0998532			0.1852	0.0362993	0.1852	0.194447
				0.1854	1.22465	0.1854	1.02961			0.1854	0.668997	0.1854	0.35209			0.1854	0.168085	0.1854	0.0999327			0.1854	0.036325	0.1854	0.194516
				0.1856	1.22528	0.1856	1.0301			0.1856	0.669491	0.1856	0.352334			0.1856	0.168162	0.1856	0.100012			0.1856	0.0363506	0.1856	0.194586
				0.1858	1.22591	0.1858	1.03059			0.1858	0.669984	0.1858	0.35258			0.1858	0.168238	0.1858	0.100092			0.1858	0.0363763	0.1858	0.194655
				0.186	1.22654	0.186	1.03109			0.186	0.670478	0.186	0.352825			0.186	0.168315	0.186	0.100171			0.186	0.036402	0.186	0.194724
				0.1862	1.22717	0.1862	1.03158			0.1862	0.670972	0.1862	0.35307			0.1862	0.168392	0.1862	0.100251			0.1862	0.0364277	0.1862	0.194794
				0.1864	1.22781	0.1864	1.03207			0.1864	0.671466	0.1864	0.353315			0.1864	0.168468	0.1864	0.100331			0.1864	0.0364534	0.1864	0.194863
				0.1866	1.22844	0.1866	1.03256			0.1866	0.671961	0.1866	0.35356			0.1866	0.168545	0.1866	0.100411			0.1866	0.0364791	0.1866	0.194932
				0.1868	1.22907	0.1868	1.03304			0.1868	0.672455	0.1868	0.353806			0.1868	0.168622	0.1868	0.10049			0.1868	0.0365048	0.1868	0.195002
				0.187	1.2297	0.187	1.03353			0.187	0.672949	0.187	0.354051			0.187	0.168698	0.187	0.10057			0.187	0.0365306	0.187	0.195071
				0.1872	1.23032	0.1872	1.03402			0.1872	0.673444	0.1872	0.354297			0.1872	0.168775	0.1872	0.10065			0.1872	0.0365564	0.1872	0.195141
				0.1874	1.23095	0.1874	1.03451			0.1874	0.673938	0.1874	0.354543			0.1874	0.168852	0.1874	0.10073			0.1874	0.0365822	0.1874	0.19521
				0.1876	1.23158	0.1876	1.035			0.1876	0.674433	0.1876	0.354789			0.1876	0.168929	0.1876	0.10081			0.1876	0.036608	0.1876	0.19528
				0.1878	1.23221	0.1878	1.03549			0.1878	0.674927	0.1878	0.355034			0.1878	0.169006	0.1878	0.10089			0.1878	0.0366338	0.1878	0.195349
				0.188	1.23284	0.188	1.03598			0.188	0.675422	0.188	0.35528			0.188	0.169082	0.188	0.10097			0.188	0.0366596	0.188	0.195419
				0.1882	1.23346	0.1882	1.03647			0.1882	0.675917	0.1882	0.355526			0.1882	0.169159	0.1882	0.10105			0.1882	0.0366855	0.1882	0.195488
				0.1884	1.23409	0.1884	1.03695			0.1884	0.676412	0.1884	0.355773			0.1884	0.169236	0.1884	0.101131			0.1884	0.0367113	0.1884	0.195558
				0.1886	1.23472	0.1886	1.03744			0.1886	0.676907	0.1886	0.356019			0.1886	0.169313	0.1886	0.101211			0.1886	0.0367372	0.1886	0.195627
				0.1888	1.23534	0.1888	1.03793			0.1888	0.677402	0.1888	0.356265			0.1888	0.16939	0.1888	0.101291			0.1888	0.0367631	0.1888	0.195697
				0.189	1.23597	0.189	1.03841			0.189	0.677897	0.189	0.356512			0.189	0.169467	0.189	0.101371			0.189	0.036789	0.189	0.195766
				0.1892	1.23659	0.1892	1.0389			0.1892	0.678392	0.1892	0.356758			0.1892	0.169544	0.1892	0.101452			0.1892	0.0368149	0.1892	0.195836
				0.1894	1.23722	0.1894	1.03939			0.1894	0.678888	0.1894	0.357005			0.1894	0.169621	0.1894	0.101532			0.1894	0.0368409	0.1894	0.195906
				0.1896	1.23784	0.1896	1.03987			0.1896	0.679383	0.1896	0.357251			0.1896	0.169698	0.1896	0.101613			0.1896	0.0368668	0.1896	0.195975
				0.1898	1.23847	0.1898	1.04036			0.1898	0.679879	0.1898	0.357498			0.1898	0.169775	0.1898	0.101693			0.1898	0.0368928	0.1898	0.196045
				0.19	1.23909	0.19	1.04085			0.19	0.680374	0.19	0.357745			0.19	0.169852	0.19	0.101774			0.19	0.0369188	0.19	0.196114
				0.1902	1.23971	0.1902	1.04133			0.1902	0.68087	0.1902	0.357992			0.1902	0.169929	0.1902	0.101854			0.1902	0.0369447	0.1902	0.196184
				0.1904	1.24034	0.1904	1.04182			0.1904	0.681365	0.1904	0.358239			0.1904	0.170006	0.1904	0.101935			0.1904	0.0369708	0.1904	0.196254
				0.1906	1.24096	0.1906	1.0423			0.1906	0.681861	0.1906	0.358486			0.1906	0.170083	0.1906	0.102016			0.1906	0.0369968	0.1906	0.196323
				0.1908	1.24158	0.1908	1.04279			0.1908	0.682357	0.1908	0.358733			0.1908	0.17016	0.1908	0.102097			0.1908	0.0370228	0.1908	0.196393
				0.191	1.2422	0.191	1.04327			0.191	0.682853	0.191	0.35898			0.191	0.170238	0.191	0.102177			0.191	0.0370489	0.191	0.196463
				0.1912	1.24282	0.1912	1.04376			0.1912	0.683349	0.1912	0.359228			0.1912	0.170315	0.1912	0.102258			0.1912	0.037075	0.1912	0.196532
				0.1914	1.24344	0.1914	1.04424			0.1914	0.683845	0.1914	0.359475			0.1914	0.170392	0.1914	0.102339			0.1914	0.037101	0.1914	0.196602
				0.1916	1.24406	0.1916	1.04472			0.1916	0.684341	0.1916	0.359722			0.1916	0.170469	0.1916	0.10242			0.1916	0.0371271	0.1916	0.196672
				0.1918	1.24468	0.1918	1.04521			0.1918	0.684838	0.1918	0.35997			0.1918	0.170546	0.1918	0.102501			0.1918	0.0371533	0.1918	0.196742
				0.192	1.2453	0.192	1.04569			0.192	0.685334	0.192	0.360218			0.192	0.170624	0.192	0.102582			0.192	0.0371794	0.192	0.196811
				0.1922	1.24592	0.1922	1.04618			0.1922	0.68583	0.1922	0.360466			0.1922	0.170701	0.1922	0.102663			0.1922	0.0372055	0.1922	0.196881
				0.1924	1.24654	0.1924	1.04666			0.1924	0.686327	0.1924	0.360713			0.1924	0.170778	0.1924	0.102745			0.1924	0.0372317	0.1924	0.196951
				0.1926	1.24716	0.1926	1.04714			0.1926	0.686823	0.1926	0.360961			0.1926	0.170856	0.1926	0.102826			0.1926	0.0372579	0.1926	0.197021
				0.1928	1.24777	0.1928	1.04762			0.1928	0.68732	0.1928	0.361209			0.1928	0.170933	0.1928	0.102907			0.1928	0.0372841	0.1928	0.19709
				0.193	1.24839	0.193	1.04811			0.193	0.687817	0.193	0.361457			0.193	0.17101	0.193	0.102988			0.193	0.0373103	0.193	0.19716
				0.1932	1.24901	0.1932	1.04859			0.1932	0.688313	0.1932	0.361706			0.1932	0.171088	0.1932	0.10307			0.1932	0.0373365	0.1932	0.19723
				0.1934	1.24962	0.1934	1.04907			0.1934	0.68881	0.1934	0.361954			0.1934	0.171165	0.1934	0.103151			0.1934	0.0373627	0.1934	0.1973
				0.1936	1.25024	0.1936	1.04955			0.1936	0.689307	0.1936	0.362202			0.1936	0.171242	0.1936	0.103233			0.1936	0.037389	0.1936	0.19737
				0.1938	1.25085	0.1938	1.05003			0.1938	0.689804	0.1938	0.362451			0.1938	0.17132	0.1938	0.103314			0.1938	0.0374153	0.1938	0.197439
				0.194	1.25147	0.194	1.05051			0.194	0.690301	0.194	0.362699			0.194	0.171397	0.194	0.103396			0.194	0.0374415	0.194	0.197509
				0.1942	1.25208	0.1942	1.05099			0.1942	0.690798	0.1942	0.362948			0.1942	0.171475	0.1942	0.103477			0.1942	0.0374678	0.1942	0.197579
				0.1944	1.2527	0.1944	1.05147			0.1944	0.691295	0.1944	0.363196			0.1944	0.171552	0.1944	0.103559			0.1944	0.0374941	0.1944	0.197649
				0.1946	1.25331	0.1946	1.05195			0.1946	0.691793	0.1946	0.363445			0.1946	0.17163	0.1946	0.103641			0.1946	0.0375205	0.1946	0.197719
				0.1948	1.25392	0.1948	1.05243			0.1948	0.69229	0.1948	0.363694			0.1948	0.171707	0.1948	0.103722			0.1948	0.0375468	0.1948	0.197789
				0.195	1.25454	0.195	1.05291			0.195	0.692787	0.195	0.363943			0.195	0.171785	0.195	0.103804			0.195	0.0375732	0.195	0.197859
				0.1952	1.25515	0.1952	1.05339			0.1952	0.693285	0.1952	0.364192			0.1952	0.171863	0.1952	0.103886			0.1952	0.0375995	0.1952	0.197929
				0.1954	1.25576	0.1954	1.05387			0.1954	0.693782	0.1954	0.364441			0.1954	0.17194	0.1954	0.103968			0.1954	0.0376259	0.1954	0.197999
				0.1956	1.25637	0.1956	1.05435			0.1956	0.69428	0.1956	0.36469			0.1956	0.172018	0.1956	0.10405			0.1956	0.0376523	0.1956	0.198069
				0.1958	1.25698	0.1958	1.05483			0.1958	0.694777	0.1958	0.36494			0.1958	0.172095	0.1958	0.104132			0.1958	0.0376788	0.1958	0.198139
				0.196	1.25759	0.196	1.05531			0.196	0.695275	0.196	0.365189			0.196	0.172173	0.196	0.104214			0.196	0.0377052	0.196	0.198209
				0.1962	1.2582	0.1962	1.05579			0.1962	0.695773	0.1962	0.365438			0.1962	0.172251	0.1962	0.104296			0.1962	0.0377316	0.1962	0.198278
				0.1964	1.25881	0.1964	1.05627			0.1964	0.696271	0.1964	0.365688			0.1964	0.172329	0.1964	0.104378			0.1964	0.0377581	0.1964	0.198348
				0.1966	1.25942	0.1966	1.05674			0.1966	0.696769	0.1966	0.365938			0.1966	0.172406	0.1966	0.10446			0.1966	0.0377846	0.1966	0.198418
				0.1968	1.26003	0.1968	1.05722			0.1968	0.697267	0.1968	0.366187			0.1968	0.172484	0.1968	0.104542			0.1968	0.0378111	0.1968	0.198489
				0.197	1.26064	0.197	1.0577			0.197	0.697765	0.197	0.366437			0.197	0.172562	0.197	0.104625			0.197	0.0378376	0.197	0.198559
				0.1972	1.26125	0.1972	1.05818			0.1972	0.698263	0.1972	0.366687			0.1972	0.17264	0.1972	0.104707			0.1972	0.0378641	0.1972	0.198629
				0.1974	1.26185	0.1974	1.05865			0.1974	0.698761	0.1974	0.366937			0.1974	0.172717	0.1974	0.104789			0.1974	0.0378907	0.1974	0.198699
				0.1976	1.26246	0.1976	1.05913			0.1976	0.699259	0.1976	0.367187			0.1976	0.172795	0.1976	0.104872			0.1976	0.0379172	0.1976	0.198769
				0.1978	1.26307	0.1978	1.05961			0.1978	0.699758	0.1978	0.367437			0.1978	0.172873	0.1978	0.104954			0.1978	0.0379438	0.1978	0.198839
				0.198	1.26367	0.198	1.06008			0.198	0.700256	0.198	0.367687			0.198	0.172951	0.198	0.105037			0.198	0.0379704	0.198	0.198909
				0.1982	1.26428	0.1982	1.06056			0.1982	0.700755	0.1982	0.367937			0.1982	0.173029	0.1982	0.105119			0.1982	0.037997	0.1982	0.198979
				0.1984	1.26488	0.1984	1.06103			0.1984	0.701253	0.1984	0.368188			0.1984	0.173107	0.1984	0.105202			0.1984	0.0380236	0.1984	0.199049
				0.1986	1.26549	0.1986	1.06151			0.1986	0.701752	0.1986	0.368438			0.1986	0.173185	0.1986	0.105285			0.1986	0.0380502	0.1986	0.199119
				0.1988	1.26609	0.1988	1.06198			0.1988	0.70225	0.1988	0.368689			0.1988	0.173263	0.1988	0.105367			0.1988	0.0380769	0.1988	0.199189
				0.199	1.2667	0.199	1.06246			0.199	0.702749	0.199	0.368939			0.199	0.173341	0.199	0.10545			0.199	0.0381035	0.199	0.199259
				0.1992	1.2673	0.1992	1.06293			0.1992	0.703248	0.1992	0.36919			0.1992	0.173419	0.1992	0.105533			0.1992	0.0381302	0.1992	0.19933
				0.1994	1.2679	0.1994	1.06341			0.1994	0.703747	0.1994	0.369441			0.1994	0.173497	0.1994	0.105616			0.1994	0.0381569	0.1994	0.1994
				0.1996	1.2685	0.1996	1.06388			0.1996	0.704245	0.1996	0.369692			0.1996	0.173575	0.1996	0.105699			0.1996	0.0381836	0.1996	0.19947
				0.1998	1.26911	0.1998	1.06435			0.1998	0.704744	0.1998	0.369942			0.1998	0.173653	0.1998	0.105782			0.1998	0.0382103	0.1998	0.19954
				0.2	1.26971	0.2	1.06483			0.2	0.705243	0.2	0.370193			0.2	0.173731	0.2	0.105865			0.2	0.0382371	0.2	0.19961
				0.2002	1.27031	0.2002	1.0653			0.2002	0.705742	0.2002	0.370445			0.2002	0.173809	0.2002	0.105948			0.2002	0.0382638	0.2002	0.199681
				0.2004	1.27091	0.2004	1.06577			0.2004	0.706242	0.2004	0.370696			0.2004	0.173887	0.2004	0.106031			0.2004	0.0382906	0.2004	0.199751
				0.2006	1.27151	0.2006	1.06625			0.2006	0.706741	0.2006	0.370947			0.2006	0.173965	0.2006	0.106114			0.2006	0.0383174	0.2006	0.199821
				0.2008	1.27211	0.2008	1.06672			0.2008	0.70724	0.2008	0.371198			0.2008	0.174043	0.2008	0.106197			0.2008	0.0383442	0.2008	0.199891
				0.201	1.27271	0.201	1.06719			0.201	0.707739	0.201	0.37145			0.201	0.174122	0.201	0.10628			0.201	0.038371	0.201	0.199962
				0.2012	1.2733	0.2012	1.06766			0.2012	0.708239	0.2012	0.371701			0.2012	0.1742	0.2012	0.106364			0.2012	0.0383978	0.2012	0.200032
				0.2014	1.2739	0.2014	1.06813			0.2014	0.708738	0.2014	0.371953			0.2014	0.174278	0.2014	0.106447			0.2014	0.0384247	0.2014	0.200102
				0.2016	1.2745	0.2016	1.0686			0.2016	0.709237	0.2016	0.372205			0.2016	0.174356	0.2016	0.10653			0.2016	0.0384515	0.2016	0.200172
				0.2018	1.2751	0.2018	1.06908			0.2018	0.709737	0.2018	0.372456			0.2018	0.174434	0.2018	0.106614			0.2018	0.0384784	0.2018	0.200243
				0.202	1.27569	0.202	1.06955			0.202	0.710237	0.202	0.372708			0.202	0.174513	0.202	0.106697			0.202	0.0385053	0.202	0.200313
				0.2022	1.27629	0.2022	1.07002			0.2022	0.710736	0.2022	0.37296			0.2022	0.174591	0.2022	0.106781			0.2022	0.0385322	0.2022	0.200383
				0.2024	1.27689	0.2024	1.07049			0.2024	0.711236	0.2024	0.373212			0.2024	0.174669	0.2024	0.106865			0.2024	0.0385591	0.2024	0.200454
				0.2026	1.27748	0.2026	1.07096			0.2026	0.711736	0.2026	0.373464			0.2026	0.174748	0.2026	0.106948			0.2026	0.0385861	0.2026	0.200524
				0.2028	1.27808	0.2028	1.07143			0.2028	0.712235	0.2028	0.373716			0.2028	0.174826	0.2028	0.107032			0.2028	0.038613	0.2028	0.200595
				0.203	1.27867	0.203	1.0719			0.203	0.712735	0.203	0.373968			0.203	0.174904	0.203	0.107116			0.203	0.03864	0.203	0.200665
				0.2032	1.27926	0.2032	1.07236			0.2032	0.713235	0.2032	0.374221			0.2032	0.174983	0.2032	0.107199			0.2032	0.038667	0.2032	0.200735
				0.2034	1.27986	0.2034	1.07283			0.2034	0.713735	0.2034	0.374473			0.2034	0.175061	0.2034	0.107283			0.2034	0.038694	0.2034	0.200806
				0.2036	1.28045	0.2036	1.0733			0.2036	0.714235	0.2036	0.374726			0.2036	0.17514	0.2036	0.107367			0.2036	0.038721	0.2036	0.200876
				0.2038	1.28104	0.2038	1.07377			0.2038	0.714735	0.2038	0.374978			0.2038	0.175218	0.2038	0.107451			0.2038	0.038748	0.2038	0.200947
				0.204	1.28163	0.204	1.07424			0.204	0.715235	0.204	0.375231			0.204	0.175297	0.204	0.107535			0.204	0.0387751	0.204	0.201017
				0.2042	1.28222	0.2042	1.07471			0.2042	0.715735	0.2042	0.375484			0.2042	0.175375	0.2042	0.107619			0.2042	0.0388021	0.2042	0.201087
				0.2044	1.28282	0.2044	1.07517			0.2044	0.716236	0.2044	0.375736			0.2044	0.175454	0.2044	0.107703			0.2044	0.0388292	0.2044	0.201158
				0.2046	1.28341	0.2046	1.07564			0.2046	0.716736	0.2046	0.375989			0.2046	0.175532	0.2046	0.107787			0.2046	0.0388563	0.2046	0.201228
				0.2048	1.284	0.2048	1.07611			0.2048	0.717236	0.2048	0.376242			0.2048	0.175611	0.2048	0.107871			0.2048	0.0388834	0.2048	0.201299
				0.205	1.28458	0.205	1.07657			0.205	0.717737	0.205	0.376495			0.205	0.175689	0.205	0.107956			0.205	0.0389105	0.205	0.201369
				0.2052	1.28517	0.2052	1.07704			0.2052	0.718237	0.2052	0.376748			0.2052	0.175768	0.2052	0.10804			0.2052	0.0389377	0.2052	0.20144
				0.2054	1.28576	0.2054	1.07751			0.2054	0.718738	0.2054	0.377002			0.2054	0.175847	0.2054	0.108124			0.2054	0.0389648	0.2054	0.20151
				0.2056	1.28635	0.2056	1.07797			0.2056	0.719238	0.2056	0.377255			0.2056	0.175925	0.2056	0.108209			0.2056	0.038992	0.2056	0.201581
				0.2058	1.28694	0.2058	1.07844			0.2058	0.719739	0.2058	0.377508			0.2058	0.176004	0.2058	0.108293			0.2058	0.0390192	0.2058	0.201651
				0.206	1.28752	0.206	1.0789			0.206	0.720239	0.206	0.377762			0.206	0.176083	0.206	0.108378			0.206	0.0390464	0.206	0.201722
				0.2062	1.28811	0.2062	1.07937			0.2062	0.72074	0.2062	0.378015			0.2062	0.176161	0.2062	0.108462			0.2062	0.0390736	0.2062	0.201792
				0.2064	1.2887	0.2064	1.07983			0.2064	0.721241	0.2064	0.378269			0.2064	0.17624	0.2064	0.108547			0.2064	0.0391008	0.2064	0.201863
				0.2066	1.28928	0.2066	1.0803			0.2066	0.721741	0.2066	0.378523			0.2066	0.176319	0.2066	0.108631			0.2066	0.0391281	0.2066	0.201934
				0.2068	1.28987	0.2068	1.08076			0.2068	0.722242	0.2068	0.378776			0.2068	0.176398	0.2068	0.108716			0.2068	0.0391553	0.2068	0.202004
				0.207	1.29045	0.207	1.08123			0.207	0.722743	0.207	0.37903			0.207	0.176476	0.207	0.108801			0.207	0.0391826	0.207	0.202075
				0.2072	1.29103	0.2072	1.08169			0.2072	0.723244	0.2072	0.379284			0.2072	0.176555	0.2072	0.108886			0.2072	0.0392099	0.2072	0.202145
				0.2074	1.29162	0.2074	1.08215			0.2074	0.723745	0.2074	0.379538			0.2074	0.176634	0.2074	0.10897			0.2074	0.0392372	0.2074	0.202216
				0.2076	1.2922	0.2076	1.08262			0.2076	0.724246	0.2076	0.379792			0.2076	0.176713	0.2076	0.109055			0.2076	0.0392645	0.2076	0.202287
				0.2078	1.29278	0.2078	1.08308			0.2078	0.724747	0.2078	0.380046			0.2078	0.176792	0.2078	0.10914			0.2078	0.0392919	0.2078	0.202357
				0.208	1.29337	0.208	1.08354			0.208	0.725248	0.208	0.380301			0.208	0.176871	0.208	0.109225			0.208	0.0393192	0.208	0.202428
				0.2082	1.29395	0.2082	1.084			0.2082	0.725749	0.2082	0.380555			0.2082	0.17695	0.2082	0.10931			0.2082	0.0393466	0.2082	0.202499
				0.2084	1.29453	0.2084	1.08446			0.2084	0.72625	0.2084	0.380809			0.2084	0.177029	0.2084	0.109395			0.2084	0.039374	0.2084	0.202569
				0.2086	1.29511	0.2086	1.08493			0.2086	0.726752	0.2086	0.381064			0.2086	0.177108	0.2086	0.10948			0.2086	0.0394014	0.2086	0.20264
				0.2088	1.29569	0.2088	1.08539			0.2088	0.727253	0.2088	0.381318			0.2088	0.177187	0.2088	0.109565			0.2088	0.0394288	0.2088	0.202711
				0.209	1.29627	0.209	1.08585			0.209	0.727754	0.209	0.381573			0.209	0.177266	0.209	0.109651			0.209	0.0394562	0.209	0.202782
				0.2092	1.29685	0.2092	1.08631			0.2092	0.728256	0.2092	0.381828			0.2092	0.177345	0.2092	0.109736			0.2092	0.0394837	0.2092	0.202852
				0.2094	1.29742	0.2094	1.08677			0.2094	0.728757	0.2094	0.382083			0.2094	0.177424	0.2094	0.109821			0.2094	0.0395111	0.2094	0.202923
				0.2096	1.298	0.2096	1.08723			0.2096	0.729258	0.2096	0.382338			0.2096	0.177503	0.2096	0.109907			0.2096	0.0395386	0.2096	0.202994
				0.2098	1.29858	0.2098	1.08769			0.2098	0.72976	0.2098	0.382592			0.2098	0.177582	0.2098	0.109992			0.2098	0.0395661	0.2098	0.203065
				0.21	1.29916	0.21	1.08815			0.21	0.730261	0.21	0.382848			0.21	0.177661	0.21	0.110078			0.21	0.0395936	0.21	0.203135
				0.2102	1.29973	0.2102	1.08861			0.2102	0.730763	0.2102	0.383103			0.2102	0.17774	0.2102	0.110163			0.2102	0.0396212	0.2102	0.203206
				0.2104	1.30031	0.2104	1.08907			0.2104	0.731264	0.2104	0.383358			0.2104	0.177819	0.2104	0.110249			0.2104	0.0396487	0.2104	0.203277
				0.2106	1.30088	0.2106	1.08953			0.2106	0.731766	0.2106	0.383613			0.2106	0.177898	0.2106	0.110334			0.2106	0.0396763	0.2106	0.203348
				0.2108	1.30146	0.2108	1.08999			0.2108	0.732268	0.2108	0.383868			0.2108	0.177977	0.2108	0.11042			0.2108	0.0397038	0.2108	0.203419
				0.211	1.30203	0.211	1.09044			0.211	0.732769	0.211	0.384124			0.211	0.178057	0.211	0.110506			0.211	0.0397314	0.211	0.203489
				0.2112	1.30261	0.2112	1.0909			0.2112	0.733271	0.2112	0.384379			0.2112	0.178136	0.2112	0.110591			0.2112	0.039759	0.2112	0.20356
				0.2114	1.30318	0.2114	1.09136			0.2114	0.733773	0.2114	0.384635			0.2114	0.178215	0.2114	0.110677			0.2114	0.0397866	0.2114	0.203631
				0.2116	1.30375	0.2116	1.09182			0.2116	0.734275	0.2116	0.384891			0.2116	0.178294	0.2116	0.110763			0.2116	0.0398143	0.2116	0.203702
				0.2118	1.30432	0.2118	1.09227			0.2118	0.734777	0.2118	0.385146			0.2118	0.178374	0.2118	0.110849			0.2118	0.0398419	0.2118	0.203773
				0.212	1.3049	0.212	1.09273			0.212	0.735279	0.212	0.385402			0.212	0.178453	0.212	0.110935			0.212	0.0398696	0.212	0.203844
				0.2122	1.30547	0.2122	1.09319			0.2122	0.735781	0.2122	0.385658			0.2122	0.178532	0.2122	0.111021			0.2122	0.0398973	0.2122	0.203915
				0.2124	1.30604	0.2124	1.09364			0.2124	0.736283	0.2124	0.385914			0.2124	0.178612	0.2124	0.111107			0.2124	0.039925	0.2124	0.203986
				0.2126	1.30661	0.2126	1.0941			0.2126	0.736785	0.2126	0.38617			0.2126	0.178691	0.2126	0.111193			0.2126	0.0399527	0.2126	0.204056
				0.2128	1.30718	0.2128	1.09455			0.2128	0.737287	0.2128	0.386426			0.2128	0.17877	0.2128	0.111279			0.2128	0.0399804	0.2128	0.204127
				0.213	1.30775	0.213	1.09501			0.213	0.737789	0.213	0.386683			0.213	0.17885	0.213	0.111365			0.213	0.0400082	0.213	0.204198
				0.2132	1.30831	0.2132	1.09546			0.2132	0.738291	0.2132	0.386939			0.2132	0.178929	0.2132	0.111452			0.2132	0.0400359	0.2132	0.204269
				0.2134	1.30888	0.2134	1.09592			0.2134	0.738793	0.2134	0.387195			0.2134	0.179009	0.2134	0.111538			0.2134	0.0400637	0.2134	0.20434
				0.2136	1.30945	0.2136	1.09637			0.2136	0.739295	0.2136	0.387452			0.2136	0.179088	0.2136	0.111624			0.2136	0.0400915	0.2136	0.204411
				0.2138	1.31002	0.2138	1.09683			0.2138	0.739797	0.2138	0.387708			0.2138	0.179168	0.2138	0.111711			0.2138	0.0401193	0.2138	0.204482
				0.214	1.31058	0.214	1.09728			0.214	0.7403	0.214	0.387965			0.214	0.179247	0.214	0.111797			0.214	0.0401471	0.214	0.204553
				0.2142	1.31115	0.2142	1.09773			0.2142	0.740802	0.2142	0.388221			0.2142	0.179327	0.2142	0.111884			0.2142	0.040175	0.2142	0.204624
				0.2144	1.31171	0.2144	1.09819			0.2144	0.741304	0.2144	0.388478			0.2144	0.179406	0.2144	0.11197			0.2144	0.0402028	0.2144	0.204695
				0.2146	1.31228	0.2146	1.09864			0.2146	0.741806	0.2146	0.388735			0.2146	0.179486	0.2146	0.112057			0.2146	0.0402307	0.2146	0.204766
				0.2148	1.31284	0.2148	1.09909			0.2148	0.742309	0.2148	0.388992			0.2148	0.179565	0.2148	0.112144			0.2148	0.0402586	0.2148	0.204837
				0.215	1.31341	0.215	1.09954			0.215	0.742811	0.215	0.389249			0.215	0.179645	0.215	0.11223			0.215	0.0402865	0.215	0.204908
				0.2152	1.31397	0.2152	1.1			0.2152	0.743314	0.2152	0.389506			0.2152	0.179725	0.2152	0.112317			0.2152	0.0403144	0.2152	0.20498
				0.2154	1.31453	0.2154	1.10045			0.2154	0.743816	0.2154	0.389763			0.2154	0.179804	0.2154	0.112404			0.2154	0.0403423	0.2154	0.205051
				0.2156	1.3151	0.2156	1.1009			0.2156	0.744319	0.2156	0.39002			0.2156	0.179884	0.2156	0.112491			0.2156	0.0403703	0.2156	0.205122
				0.2158	1.31566	0.2158	1.10135			0.2158	0.744821	0.2158	0.390278			0.2158	0.179964	0.2158	0.112578			0.2158	0.0403983	0.2158	0.205193
				0.216	1.31622	0.216	1.1018			0.216	0.745324	0.216	0.390535			0.216	0.180043	0.216	0.112664			0.216	0.0404262	0.216	0.205264
				0.2162	1.31678	0.2162	1.10225			0.2162	0.745826	0.2162	0.390793			0.2162	0.180123	0.2162	0.112751			0.2162	0.0404542	0.2162	0.205335
				0.2164	1.31734	0.2164	1.1027			0.2164	0.746329	0.2164	0.39105			0.2164	0.180203	0.2164	0.112839			0.2164	0.0404823	0.2164	0.205406
				0.2166	1.3179	0.2166	1.10315			0.2166	0.746832	0.2166	0.391308			0.2166	0.180282	0.2166	0.112926			0.2166	0.0405103	0.2166	0.205477
				0.2168	1.31846	0.2168	1.1036			0.2168	0.747334	0.2168	0.391565			0.2168	0.180362	0.2168	0.113013			0.2168	0.0405383	0.2168	0.205548
				0.217	1.31901	0.217	1.10405			0.217	0.747837	0.217	0.391823			0.217	0.180442	0.217	0.1131			0.217	0.0405664	0.217	0.20562
				0.2172	1.31957	0.2172	1.1045			0.2172	0.74834	0.2172	0.392081			0.2172	0.180522	0.2172	0.113187			0.2172	0.0405945	0.2172	0.205691
				0.2174	1.32013	0.2174	1.10495			0.2174	0.748842	0.2174	0.392339			0.2174	0.180602	0.2174	0.113275			0.2174	0.0406226	0.2174	0.205762
				0.2176	1.32069	0.2176	1.10539			0.2176	0.749345	0.2176	0.392597			0.2176	0.180682	0.2176	0.113362			0.2176	0.0406507	0.2176	0.205833
				0.2178	1.32124	0.2178	1.10584			0.2178	0.749848	0.2178	0.392855			0.2178	0.180761	0.2178	0.113449			0.2178	0.0406788	0.2178	0.205904
				0.218	1.3218	0.218	1.10629			0.218	0.750351	0.218	0.393113			0.218	0.180841	0.218	0.113537			0.218	0.0407069	0.218	0.205976
				0.2182	1.32235	0.2182	1.10674			0.2182	0.750854	0.2182	0.393371			0.2182	0.180921	0.2182	0.113624			0.2182	0.0407351	0.2182	0.206047
				0.2184	1.32291	0.2184	1.10718			0.2184	0.751357	0.2184	0.39363			0.2184	0.181001	0.2184	0.113712			0.2184	0.0407633	0.2184	0.206118
				0.2186	1.32346	0.2186	1.10763			0.2186	0.751859	0.2186	0.393888			0.2186	0.181081	0.2186	0.113799			0.2186	0.0407914	0.2186	0.206189
				0.2188	1.32402	0.2188	1.10808			0.2188	0.752362	0.2188	0.394146			0.2188	0.181161	0.2188	0.113887			0.2188	0.0408196	0.2188	0.206261
				0.219	1.32457	0.219	1.10852			0.219	0.752865	0.219	0.394405			0.219	0.181241	0.219	0.113975			0.219	0.0408479	0.219	0.206332
				0.2192	1.32512	0.2192	1.10897			0.2192	0.753368	0.2192	0.394663			0.2192	0.181321	0.2192	0.114063			0.2192	0.0408761	0.2192	0.206403
				0.2194	1.32567	0.2194	1.10941			0.2194	0.753871	0.2194	0.394922			0.2194	0.181401	0.2194	0.11415			0.2194	0.0409044	0.2194	0.206475
				0.2196	1.32622	0.2196	1.10986			0.2196	0.754374	0.2196	0.395181			0.2196	0.181481	0.2196	0.114238			0.2196	0.0409326	0.2196	0.206546
				0.2198	1.32677	0.2198	1.1103			0.2198	0.754877	0.2198	0.39544			0.2198	0.181561	0.2198	0.114326			0.2198	0.0409609	0.2198	0.206617
				0.22	1.32732	0.22	1.11075			0.22	0.75538	0.22	0.395699			0.22	0.181642	0.22	0.114414			0.22	0.0409892	0.22	0.206689
				0.2202	1.32787	0.2202	1.11119			0.2202	0.755883	0.2202	0.395958			0.2202	0.181722	0.2202	0.114502			0.2202	0.0410175	0.2202	0.20676
				0.2204	1.32842	0.2204	1.11164			0.2204	0.756386	0.2204	0.396217			0.2204	0.181802	0.2204	0.11459			0.2204	0.0410458	0.2204	0.206831
				0.2206	1.32897	0.2206	1.11208			0.2206	0.75689	0.2206	0.396476			0.2206	0.181882	0.2206	0.114678			0.2206	0.0410742	0.2206	0.206903
				0.2208	1.32952	0.2208	1.11252			0.2208	0.757393	0.2208	0.396735			0.2208	0.181962	0.2208	0.114766			0.2208	0.0411026	0.2208	0.206974
				0.221	1.33007	0.221	1.11297			0.221	0.757896	0.221	0.396994			0.221	0.182042	0.221	0.114855			0.221	0.0411309	0.221	0.207045
				0.2212	1.33061	0.2212	1.11341			0.2212	0.758399	0.2212	0.397254			0.2212	0.182123	0.2212	0.114943			0.2212	0.0411593	0.2212	0.207117
				0.2214	1.33116	0.2214	1.11385			0.2214	0.758902	0.2214	0.397513			0.2214	0.182203	0.2214	0.115031			0.2214	0.0411877	0.2214	0.207188
				0.2216	1.3317	0.2216	1.11429			0.2216	0.759405	0.2216	0.397772			0.2216	0.182283	0.2216	0.115119			0.2216	0.0412162	0.2216	0.20726
				0.2218	1.33225	0.2218	1.11473			0.2218	0.759909	0.2218	0.398032			0.2218	0.182363	0.2218	0.115208			0.2218	0.0412446	0.2218	0.207331
				0.222	1.33279	0.222	1.11518			0.222	0.760412	0.222	0.398292			0.222	0.182444	0.222	0.115296			0.222	0.0412731	0.222	0.207403
				0.2222	1.33334	0.2222	1.11562			0.2222	0.760915	0.2222	0.398551			0.2222	0.182524	0.2222	0.115385			0.2222	0.0413015	0.2222	0.207474
				0.2224	1.33388	0.2224	1.11606			0.2224	0.761418	0.2224	0.398811			0.2224	0.182604	0.2224	0.115473			0.2224	0.04133	0.2224	0.207545
				0.2226	1.33442	0.2226	1.1165			0.2226	0.761922	0.2226	0.399071			0.2226	0.182685	0.2226	0.115562			0.2226	0.0413585	0.2226	0.207617
				0.2228	1.33497	0.2228	1.11694			0.2228	0.762425	0.2228	0.399331			0.2228	0.182765	0.2228	0.115651			0.2228	0.041387	0.2228	0.207688
				0.223	1.33551	0.223	1.11738			0.223	0.762928	0.223	0.399591			0.223	0.182846	0.223	0.115739			0.223	0.0414156	0.223	0.20776
				0.2232	1.33605	0.2232	1.11782			0.2232	0.763432	0.2232	0.399851			0.2232	0.182926	0.2232	0.115828			0.2232	0.0414441	0.2232	0.207831
				0.2234	1.33659	0.2234	1.11826			0.2234	0.763935	0.2234	0.400111			0.2234	0.183007	0.2234	0.115917			0.2234	0.0414727	0.2234	0.207903
				0.2236	1.33713	0.2236	1.11869			0.2236	0.764438	0.2236	0.400372			0.2236	0.183087	0.2236	0.116006			0.2236	0.0415013	0.2236	0.207974
				0.2238	1.33767	0.2238	1.11913			0.2238	0.764942	0.2238	0.400632			0.2238	0.183167	0.2238	0.116095			0.2238	0.0415299	0.2238	0.208046
				0.224	1.33821	0.224	1.11957			0.224	0.765445	0.224	0.400892			0.224	0.183248	0.224	0.116184			0.224	0.0415585	0.224	0.208118
				0.2242	1.33874	0.2242	1.12001			0.2242	0.765949	0.2242	0.401153			0.2242	0.183329	0.2242	0.116273			0.2242	0.0415871	0.2242	0.208189
				0.2244	1.33928	0.2244	1.12045			0.2244	0.766452	0.2244	0.401413			0.2244	0.183409	0.2244	0.116362			0.2244	0.0416158	0.2244	0.208261
				0.2246	1.33982	0.2246	1.12088			0.2246	0.766955	0.2246	0.401674			0.2246	0.18349	0.2246	0.116451			0.2246	0.0416445	0.2246	0.208332
				0.2248	1.34036	0.2248	1.12132			0.2248	0.767459	0.2248	0.401935			0.2248	0.18357	0.2248	0.11654			0.2248	0.0416731	0.2248	0.208404
				0.225	1.34089	0.225	1.12176			0.225	0.767962	0.225	0.402195			0.225	0.183651	0.225	0.116629			0.225	0.0417018	0.225	0.208476
				0.2252	1.34143	0.2252	1.12219			0.2252	0.768466	0.2252	0.402456			0.2252	0.183731	0.2252	0.116718			0.2252	0.0417305	0.2252	0.208547
				0.2254	1.34196	0.2254	1.12263			0.2254	0.768969	0.2254	0.402717			0.2254	0.183812	0.2254	0.116808			0.2254	0.0417593	0.2254	0.208619
				0.2256	1.3425	0.2256	1.12306			0.2256	0.769473	0.2256	0.402978			0.2256	0.183893	0.2256	0.116897			0.2256	0.041788	0.2256	0.20869
				0.2258	1.34303	0.2258	1.1235			0.2258	0.769976	0.2258	0.403239			0.2258	0.183973	0.2258	0.116986			0.2258	0.0418168	0.2258	0.208762
				0.226	1.34356	0.226	1.12393			0.226	0.77048	0.226	0.4035			0.226	0.184054	0.226	0.117076			0.226	0.0418456	0.226	0.208834
				0.2262	1.34409	0.2262	1.12437			0.2262	0.770983	0.2262	0.403761			0.2262	0.184135	0.2262	0.117165			0.2262	0.0418744	0.2262	0.208905
				0.2264	1.34463	0.2264	1.1248			0.2264	0.771487	0.2264	0.404023			0.2264	0.184216	0.2264	0.117255			0.2264	0.0419032	0.2264	0.208977
				0.2266	1.34516	0.2266	1.12524			0.2266	0.77199	0.2266	0.404284			0.2266	0.184296	0.2266	0.117345			0.2266	0.041932	0.2266	0.209049
				0.2268	1.34569	0.2268	1.12567			0.2268	0.772494	0.2268	0.404545			0.2268	0.184377	0.2268	0.117434			0.2268	0.0419608	0.2268	0.209121
				0.227	1.34622	0.227	1.1261			0.227	0.772997	0.227	0.404807			0.227	0.184458	0.227	0.117524			0.227	0.0419897	0.227	0.209192
				0.2272	1.34675	0.2272	1.12653			0.2272	0.773501	0.2272	0.405068			0.2272	0.184539	0.2272	0.117614			0.2272	0.0420186	0.2272	0.209264
				0.2274	1.34728	0.2274	1.12697			0.2274	0.774004	0.2274	0.40533			0.2274	0.18462	0.2274	0.117704			0.2274	0.0420475	0.2274	0.209336
				0.2276	1.3478	0.2276	1.1274			0.2276	0.774508	0.2276	0.405592			0.2276	0.184701	0.2276	0.117793			0.2276	0.0420764	0.2276	0.209407
				0.2278	1.34833	0.2278	1.12783			0.2278	0.775011	0.2278	0.405854			0.2278	0.184781	0.2278	0.117883			0.2278	0.0421053	0.2278	0.209479
				0.228	1.34886	0.228	1.12826			0.228	0.775515	0.228	0.406115			0.228	0.184862	0.228	0.117973			0.228	0.0421342	0.228	0.209551
				0.2282	1.34939	0.2282	1.12869			0.2282	0.776019	0.2282	0.406377			0.2282	0.184943	0.2282	0.118063			0.2282	0.0421632	0.2282	0.209623
				0.2284	1.34991	0.2284	1.12912			0.2284	0.776522	0.2284	0.406639			0.2284	0.185024	0.2284	0.118153			0.2284	0.0421922	0.2284	0.209695
				0.2286	1.35044	0.2286	1.12955			0.2286	0.777026	0.2286	0.406901			0.2286	0.185105	0.2286	0.118243			0.2286	0.0422211	0.2286	0.209766
				0.2288	1.35096	0.2288	1.12998			0.2288	0.777529	0.2288	0.407164			0.2288	0.185186	0.2288	0.118334			0.2288	0.0422501	0.2288	0.209838
				0.229	1.35149	0.229	1.13041			0.229	0.778033	0.229	0.407426			0.229	0.185267	0.229	0.118424			0.229	0.0422792	0.229	0.20991
				0.2292	1.35201	0.2292	1.13084			0.2292	0.778536	0.2292	0.407688			0.2292	0.185348	0.2292	0.118514			0.2292	0.0423082	0.2292	0.209982
				0.2294	1.35253	0.2294	1.13127			0.2294	0.77904	0.2294	0.40795			0.2294	0.185429	0.2294	0.118604			0.2294	0.0423372	0.2294	0.210054
				0.2296	1.35305	0.2296	1.1317			0.2296	0.779544	0.2296	0.408213			0.2296	0.18551	0.2296	0.118695			0.2296	0.0423663	0.2296	0.210126
				0.2298	1.35358	0.2298	1.13213			0.2298	0.780047	0.2298	0.408475			0.2298	0.185591	0.2298	0.118785			0.2298	0.0423954	0.2298	0.210197
				0.23	1.3541	0.23	1.13256			0.23	0.780551	0.23	0.408738			0.23	0.185673	0.23	0.118876			0.23	0.0424245	0.23	0.210269
				0.2302	1.35462	0.2302	1.13299			0.2302	0.781054	0.2302	0.409			0.2302	0.185754	0.2302	0.118966			0.2302	0.0424536	0.2302	0.210341
				0.2304	1.35514	0.2304	1.13341			0.2304	0.781558	0.2304	0.409263			0.2304	0.185835	0.2304	0.119057			0.2304	0.0424827	0.2304	0.210413
				0.2306	1.35566	0.2306	1.13384			0.2306	0.782061	0.2306	0.409526			0.2306	0.185916	0.2306	0.119147			0.2306	0.0425119	0.2306	0.210485
				0.2308	1.35618	0.2308	1.13427			0.2308	0.782565	0.2308	0.409789			0.2308	0.185997	0.2308	0.119238			0.2308	0.0425411	0.2308	0.210557
				0.231	1.35669	0.231	1.13469			0.231	0.783069	0.231	0.410052			0.231	0.186078	0.231	0.119329			0.231	0.0425702	0.231	0.210629
				0.2312	1.35721	0.2312	1.13512			0.2312	0.783572	0.2312	0.410315			0.2312	0.18616	0.2312	0.11942			0.2312	0.0425994	0.2312	0.210701
				0.2314	1.35773	0.2314	1.13554			0.2314	0.784076	0.2314	0.410578			0.2314	0.186241	0.2314	0.11951			0.2314	0.0426287	0.2314	0.210773
				0.2316	1.35824	0.2316	1.13597			0.2316	0.784579	0.2316	0.410841			0.2316	0.186322	0.2316	0.119601			0.2316	0.0426579	0.2316	0.210845
				0.2318	1.35876	0.2318	1.13639			0.2318	0.785083	0.2318	0.411104			0.2318	0.186403	0.2318	0.119692			0.2318	0.0426871	0.2318	0.210917
				0.232	1.35928	0.232	1.13682			0.232	0.785586	0.232	0.411367			0.232	0.186485	0.232	0.119783			0.232	0.0427164	0.232	0.210989
				0.2322	1.35979	0.2322	1.13724			0.2322	0.78609	0.2322	0.411631			0.2322	0.186566	0.2322	0.119874			0.2322	0.0427457	0.2322	0.211061
				0.2324	1.3603	0.2324	1.13767			0.2324	0.786594	0.2324	0.411894			0.2324	0.186647	0.2324	0.119965			0.2324	0.042775	0.2324	0.211133
				0.2326	1.36082	0.2326	1.13809			0.2326	0.787097	0.2326	0.412158			0.2326	0.186729	0.2326	0.120056			0.2326	0.0428043	0.2326	0.211205
				0.2328	1.36133	0.2328	1.13851			0.2328	0.787601	0.2328	0.412421			0.2328	0.18681	0.2328	0.120148			0.2328	0.0428336	0.2328	0.211277
				0.233	1.36184	0.233	1.13894			0.233	0.788104	0.233	0.412685			0.233	0.186892	0.233	0.120239			0.233	0.042863	0.233	0.211349
				0.2332	1.36235	0.2332	1.13936			0.2332	0.788608	0.2332	0.412949			0.2332	0.186973	0.2332	0.12033			0.2332	0.0428923	0.2332	0.211421
				0.2334	1.36286	0.2334	1.13978			0.2334	0.789111	0.2334	0.413212			0.2334	0.187054	0.2334	0.120421			0.2334	0.0429217	0.2334	0.211493
				0.2336	1.36337	0.2336	1.1402			0.2336	0.789615	0.2336	0.413476			0.2336	0.187136	0.2336	0.120513			0.2336	0.0429511	0.2336	0.211565
				0.2338	1.36388	0.2338	1.14062			0.2338	0.790118	0.2338	0.41374			0.2338	0.187217	0.2338	0.120604			0.2338	0.0429805	0.2338	0.211637
				0.234	1.36439	0.234	1.14105			0.234	0.790622	0.234	0.414004			0.234	0.187299	0.234	0.120696			0.234	0.0430099	0.234	0.211709
				0.2342	1.3649	0.2342	1.14147			0.2342	0.791125	0.2342	0.414268			0.2342	0.18738	0.2342	0.120787			0.2342	0.0430394	0.2342	0.211781
				0.2344	1.36541	0.2344	1.14189			0.2344	0.791629	0.2344	0.414532			0.2344	0.187462	0.2344	0.120879			0.2344	0.0430688	0.2344	0.211853
				0.2346	1.36592	0.2346	1.14231			0.2346	0.792132	0.2346	0.414796			0.2346	0.187543	0.2346	0.12097			0.2346	0.0430983	0.2346	0.211926
				0.2348	1.36642	0.2348	1.14273			0.2348	0.792636	0.2348	0.415061			0.2348	0.187625	0.2348	0.121062			0.2348	0.0431278	0.2348	0.211998
				0.235	1.36693	0.235	1.14315			0.235	0.793139	0.235	0.415325			0.235	0.187707	0.235	0.121154			0.235	0.0431573	0.235	0.21207
				0.2352	1.36743	0.2352	1.14357			0.2352	0.793643	0.2352	0.415589			0.2352	0.187788	0.2352	0.121246			0.2352	0.0431868	0.2352	0.212142
				0.2354	1.36794	0.2354	1.14398			0.2354	0.794146	0.2354	0.415854			0.2354	0.18787	0.2354	0.121337			0.2354	0.0432163	0.2354	0.212214
				0.2356	1.36844	0.2356	1.1444			0.2356	0.794649	0.2356	0.416118			0.2356	0.187952	0.2356	0.121429			0.2356	0.0432459	0.2356	0.212286
				0.2358	1.36894	0.2358	1.14482			0.2358	0.795153	0.2358	0.416383			0.2358	0.188033	0.2358	0.121521			0.2358	0.0432755	0.2358	0.212359
				0.236	1.36945	0.236	1.14524			0.236	0.795656	0.236	0.416648			0.236	0.188115	0.236	0.121613			0.236	0.0433051	0.236	0.212431
				0.2362	1.36995	0.2362	1.14565			0.2362	0.79616	0.2362	0.416913			0.2362	0.188197	0.2362	0.121705			0.2362	0.0433347	0.2362	0.212503
				0.2364	1.37045	0.2364	1.14607			0.2364	0.796663	0.2364	0.417177			0.2364	0.188278	0.2364	0.121797			0.2364	0.0433643	0.2364	0.212575
				0.2366	1.37095	0.2366	1.14649			0.2366	0.797166	0.2366	0.417442			0.2366	0.18836	0.2366	0.12189			0.2366	0.0433939	0.2366	0.212647
				0.2368	1.37145	0.2368	1.1469			0.2368	0.79767	0.2368	0.417707			0.2368	0.188442	0.2368	0.121982			0.2368	0.0434236	0.2368	0.21272
				0.237	1.37195	0.237	1.14732			0.237	0.798173	0.237	0.417972			0.237	0.188524	0.237	0.122074			0.237	0.0434533	0.237	0.212792
				0.2372	1.37245	0.2372	1.14774			0.2372	0.798676	0.2372	0.418237			0.2372	0.188606	0.2372	0.122166			0.2372	0.0434829	0.2372	0.212864
				0.2374	1.37295	0.2374	1.14815			0.2374	0.79918	0.2374	0.418502			0.2374	0.188687	0.2374	0.122259			0.2374	0.0435126	0.2374	0.212936
				0.2376	1.37345	0.2376	1.14857			0.2376	0.799683	0.2376	0.418768			0.2376	0.188769	0.2376	0.122351			0.2376	0.0435424	0.2376	0.213009
				0.2378	1.37394	0.2378	1.14898			0.2378	0.800186	0.2378	0.419033			0.2378	0.188851	0.2378	0.122444			0.2378	0.0435721	0.2378	0.213081
				0.238	1.37444	0.238	1.14939			0.238	0.800689	0.238	0.419298			0.238	0.188933	0.238	0.122536			0.238	0.0436019	0.238	0.213153
				0.2382	1.37494	0.2382	1.14981			0.2382	0.801193	0.2382	0.419564			0.2382	0.189015	0.2382	0.122629			0.2382	0.0436316	0.2382	0.213226
				0.2384	1.37543	0.2384	1.15022			0.2384	0.801696	0.2384	0.419829			0.2384	0.189097	0.2384	0.122721			0.2384	0.0436614	0.2384	0.213298
				0.2386	1.37593	0.2386	1.15063			0.2386	0.802199	0.2386	0.420095			0.2386	0.189179	0.2386	0.122814			0.2386	0.0436912	0.2386	0.21337
				0.2388	1.37642	0.2388	1.15105			0.2388	0.802702	0.2388	0.42036			0.2388	0.189261	0.2388	0.122907			0.2388	0.043721	0.2388	0.213443
				0.239	1.37691	0.239	1.15146			0.239	0.803205	0.239	0.420626			0.239	0.189343	0.239	0.122999			0.239	0.0437509	0.239	0.213515
				0.2392	1.37741	0.2392	1.15187			0.2392	0.803709	0.2392	0.420892			0.2392	0.189425	0.2392	0.123092			0.2392	0.0437807	0.2392	0.213587
				0.2394	1.3779	0.2394	1.15228			0.2394	0.804212	0.2394	0.421158			0.2394	0.189507	0.2394	0.123185			0.2394	0.0438106	0.2394	0.21366
				0.2396	1.37839	0.2396	1.15269			0.2396	0.804715	0.2396	0.421424			0.2396	0.189589	0.2396	0.123278			0.2396	0.0438405	0.2396	0.213732
				0.2398	1.37888	0.2398	1.1531			0.2398	0.805218	0.2398	0.42169			0.2398	0.189671	0.2398	0.123371			0.2398	0.0438704	0.2398	0.213805
				0.24	1.37937	0.24	1.15351			0.24	0.805721	0.24	0.421956			0.24	0.189753	0.24	0.123464			0.24	0.0439003	0.24	0.213877
				0.2402	1.37986	0.2402	1.15392			0.2402	0.806224	0.2402	0.422222			0.2402	0.189835	0.2402	0.123557			0.2402	0.0439302	0.2402	0.213949
				0.2404	1.38035	0.2404	1.15433			0.2404	0.806727	0.2404	0.422488			0.2404	0.189917	0.2404	0.12365			0.2404	0.0439602	0.2404	0.214022
				0.2406	1.38084	0.2406	1.15474			0.2406	0.80723	0.2406	0.422754			0.2406	0.189999	0.2406	0.123743			0.2406	0.0439901	0.2406	0.214094
				0.2408	1.38132	0.2408	1.15515			0.2408	0.807733	0.2408	0.423021			0.2408	0.190082	0.2408	0.123836			0.2408	0.0440201	0.2408	0.214167
				0.241	1.38181	0.241	1.15556			0.241	0.808236	0.241	0.423287			0.241	0.190164	0.241	0.12393			0.241	0.0440501	0.241	0.214239
				0.2412	1.3823	0.2412	1.15597			0.2412	0.808739	0.2412	0.423553			0.2412	0.190246	0.2412	0.124023			0.2412	0.0440801	0.2412	0.214312
				0.2414	1.38278	0.2414	1.15637			0.2414	0.809242	0.2414	0.42382			0.2414	0.190328	0.2414	0.124116			0.2414	0.0441102	0.2414	0.214384
				0.2416	1.38327	0.2416	1.15678			0.2416	0.809745	0.2416	0.424086			0.2416	0.190411	0.2416	0.12421			0.2416	0.0441402	0.2416	0.214457
				0.2418	1.38375	0.2418	1.15719			0.2418	0.810248	0.2418	0.424353			0.2418	0.190493	0.2418	0.124303			0.2418	0.0441703	0.2418	0.214529
				0.242	1.38423	0.242	1.1576			0.242	0.81075	0.242	0.42462			0.242	0.190575	0.242	0.124397			0.242	0.0442004	0.242	0.214602
				0.2422	1.38472	0.2422	1.158			0.2422	0.811253	0.2422	0.424887			0.2422	0.190657	0.2422	0.12449			0.2422	0.0442305	0.2422	0.214674
				0.2424	1.3852	0.2424	1.15841			0.2424	0.811756	0.2424	0.425153			0.2424	0.19074	0.2424	0.124584			0.2424	0.0442606	0.2424	0.214747
				0.2426	1.38568	0.2426	1.15881			0.2426	0.812259	0.2426	0.42542			0.2426	0.190822	0.2426	0.124678			0.2426	0.0442907	0.2426	0.214819
				0.2428	1.38616	0.2428	1.15922			0.2428	0.812761	0.2428	0.425687			0.2428	0.190904	0.2428	0.124771			0.2428	0.0443209	0.2428	0.214892
				0.243	1.38664	0.243	1.15962			0.243	0.813264	0.243	0.425954			0.243	0.190987	0.243	0.124865			0.243	0.044351	0.243	0.214964
				0.2432	1.38712	0.2432	1.16003			0.2432	0.813767	0.2432	0.426221			0.2432	0.191069	0.2432	0.124959			0.2432	0.0443812	0.2432	0.215037
				0.2434	1.3876	0.2434	1.16043			0.2434	0.814269	0.2434	0.426489			0.2434	0.191152	0.2434	0.125053			0.2434	0.0444114	0.2434	0.21511
				0.2436	1.38808	0.2436	1.16084			0.2436	0.814772	0.2436	0.426756			0.2436	0.191234	0.2436	0.125147			0.2436	0.0444416	0.2436	0.215182
				0.2438	1.38856	0.2438	1.16124			0.2438	0.815275	0.2438	0.427023			0.2438	0.191317	0.2438	0.125241			0.2438	0.0444718	0.2438	0.215255
				0.244	1.38903	0.244	1.16164			0.244	0.815777	0.244	0.427291			0.244	0.191399	0.244	0.125335			0.244	0.0445021	0.244	0.215327
				0.2442	1.38951	0.2442	1.16204			0.2442	0.81628	0.2442	0.427558			0.2442	0.191482	0.2442	0.125429			0.2442	0.0445324	0.2442	0.2154
				0.2444	1.38999	0.2444	1.16245			0.2444	0.816782	0.2444	0.427825			0.2444	0.191564	0.2444	0.125523			0.2444	0.0445626	0.2444	0.215473
				0.2446	1.39046	0.2446	1.16285			0.2446	0.817285	0.2446	0.428093			0.2446	0.191647	0.2446	0.125617			0.2446	0.0445929	0.2446	0.215545
				0.2448	1.39094	0.2448	1.16325			0.2448	0.817787	0.2448	0.428361			0.2448	0.191729	0.2448	0.125711			0.2448	0.0446233	0.2448	0.215618
				0.245	1.39141	0.245	1.16365			0.245	0.818289	0.245	0.428628			0.245	0.191812	0.245	0.125806			0.245	0.0446536	0.245	0.215691
				0.2452	1.39188	0.2452	1.16405			0.2452	0.818792	0.2452	0.428896			0.2452	0.191894	0.2452	0.1259			0.2452	0.0446839	0.2452	0.215763
				0.2454	1.39235	0.2454	1.16445			0.2454	0.819294	0.2454	0.429164			0.2454	0.191977	0.2454	0.125995			0.2454	0.0447143	0.2454	0.215836
				0.2456	1.39283	0.2456	1.16485			0.2456	0.819796	0.2456	0.429432			0.2456	0.19206	0.2456	0.126089			0.2456	0.0447447	0.2456	0.215909
				0.2458	1.3933	0.2458	1.16525			0.2458	0.820299	0.2458	0.4297			0.2458	0.192142	0.2458	0.126183			0.2458	0.0447751	0.2458	0.215981
				0.246	1.39377	0.246	1.16565			0.246	0.820801	0.246	0.429968			0.246	0.192225	0.246	0.126278			0.246	0.0448055	0.246	0.216054
				0.2462	1.39424	0.2462	1.16605			0.2462	0.821303	0.2462	0.430236			0.2462	0.192308	0.2462	0.126373			0.2462	0.0448359	0.2462	0.216127
				0.2464	1.39471	0.2464	1.16645			0.2464	0.821805	0.2464	0.430504			0.2464	0.19239	0.2464	0.126467			0.2464	0.0448664	0.2464	0.2162
				0.2466	1.39518	0.2466	1.16684			0.2466	0.822307	0.2466	0.430772			0.2466	0.192473	0.2466	0.126562			0.2466	0.0448968	0.2466	0.216272
				0.2468	1.39564	0.2468	1.16724			0.2468	0.82281	0.2468	0.431041			0.2468	0.192556	0.2468	0.126657			0.2468	0.0449273	0.2468	0.216345
				0.247	1.39611	0.247	1.16764			0.247	0.823312	0.247	0.431309			0.247	0.192639	0.247	0.126752			0.247	0.0449578	0.247	0.216418
				0.2472	1.39658	0.2472	1.16804			0.2472	0.823814	0.2472	0.431577			0.2472	0.192721	0.2472	0.126846			0.2472	0.0449883	0.2472	0.216491
				0.2474	1.39704	0.2474	1.16843			0.2474	0.824316	0.2474	0.431846			0.2474	0.192804	0.2474	0.126941			0.2474	0.0450189	0.2474	0.216564
				0.2476	1.39751	0.2476	1.16883			0.2476	0.824818	0.2476	0.432114			0.2476	0.192887	0.2476	0.127036			0.2476	0.0450494	0.2476	0.216636
				0.2478	1.39797	0.2478	1.16922			0.2478	0.82532	0.2478	0.432383			0.2478	0.19297	0.2478	0.127131			0.2478	0.04508	0.2478	0.216709
				0.248	1.39844	0.248	1.16962			0.248	0.825821	0.248	0.432652			0.248	0.193053	0.248	0.127226			0.248	0.0451105	0.248	0.216782
				0.2482	1.3989	0.2482	1.17001			0.2482	0.826323	0.2482	0.43292			0.2482	0.193136	0.2482	0.127321			0.2482	0.0451411	0.2482	0.216855
				0.2484	1.39936	0.2484	1.17041			0.2484	0.826825	0.2484	0.433189			0.2484	0.193219	0.2484	0.127417			0.2484	0.0451718	0.2484	0.216928
				0.2486	1.39982	0.2486	1.1708			0.2486	0.827327	0.2486	0.433458			0.2486	0.193302	0.2486	0.127512			0.2486	0.0452024	0.2486	0.217001
				0.2488	1.40028	0.2488	1.1712			0.2488	0.827828	0.2488	0.433727			0.2488	0.193384	0.2488	0.127607			0.2488	0.045233	0.2488	0.217073
				0.249	1.40074	0.249	1.17159			0.249	0.82833	0.249	0.433996			0.249	0.193467	0.249	0.127702			0.249	0.0452637	0.249	0.217146
				0.2492	1.4012	0.2492	1.17198			0.2492	0.828832	0.2492	0.434265			0.2492	0.19355	0.2492	0.127798			0.2492	0.0452944	0.2492	0.217219
				0.2494	1.40166	0.2494	1.17238			0.2494	0.829333	0.2494	0.434534			0.2494	0.193633	0.2494	0.127893			0.2494	0.0453251	0.2494	0.217292
				0.2496	1.40212	0.2496	1.17277			0.2496	0.829835	0.2496	0.434803			0.2496	0.193716	0.2496	0.127989			0.2496	0.0453558	0.2496	0.217365
				0.2498	1.40258	0.2498	1.17316			0.2498	0.830336	0.2498	0.435073			0.2498	0.1938	0.2498	0.128084			0.2498	0.0453865	0.2498	0.217438
				0.25	1.40304	0.25	1.17355			0.25	0.830838	0.25	0.435342			0.25	0.193883	0.25	0.12818			0.25	0.0454173	0.25	0.217511
				0.2502	1.40349	0.2502	1.17394			0.2502	0.831339	0.2502	0.435611			0.2502	0.193966	0.2502	0.128275			0.2502	0.045448	0.2502	0.217584
				0.2504	1.40395	0.2504	1.17433			0.2504	0.831841	0.2504	0.435881			0.2504	0.194049	0.2504	0.128371			0.2504	0.0454788	0.2504	0.217657
				0.2506	1.4044	0.2506	1.17472			0.2506	0.832342	0.2506	0.43615			0.2506	0.194132	0.2506	0.128467			0.2506	0.0455096	0.2506	0.21773
				0.2508	1.40486	0.2508	1.17511			0.2508	0.832843	0.2508	0.43642			0.2508	0.194215	0.2508	0.128563			0.2508	0.0455404	0.2508	0.217803
				0.251	1.40531	0.251	1.1755			0.251	0.833345	0.251	0.436689			0.251	0.194298	0.251	0.128658			0.251	0.0455713	0.251	0.217876
				0.2512	1.40576	0.2512	1.17589			0.2512	0.833846	0.2512	0.436959			0.2512	0.194381	0.2512	0.128754			0.2512	0.0456021	0.2512	0.217949
				0.2514	1.40621	0.2514	1.17628			0.2514	0.834347	0.2514	0.437229			0.2514	0.194465	0.2514	0.12885			0.2514	0.045633	0.2514	0.218022
				0.2516	1.40667	0.2516	1.17667			0.2516	0.834848	0.2516	0.437499			0.2516	0.194548	0.2516	0.128946			0.2516	0.0456639	0.2516	0.218095
				0.2518	1.40712	0.2518	1.17706			0.2518	0.835349	0.2518	0.437768			0.2518	0.194631	0.2518	0.129042			0.2518	0.0456948	0.2518	0.218168
				0.252	1.40757	0.252	1.17744			0.252	0.83585	0.252	0.438038			0.252	0.194714	0.252	0.129138			0.252	0.0457257	0.252	0.218241
				0.2522	1.40802	0.2522	1.17783			0.2522	0.836351	0.2522	0.438308			0.2522	0.194798	0.2522	0.129235			0.2522	0.0457566	0.2522	0.218314
				0.2524	1.40847	0.2524	1.17822			0.2524	0.836852	0.2524	0.438578			0.2524	0.194881	0.2524	0.129331			0.2524	0.0457876	0.2524	0.218387
				0.2526	1.40891	0.2526	1.1786			0.2526	0.837353	0.2526	0.438849			0.2526	0.194964	0.2526	0.129427			0.2526	0.0458185	0.2526	0.21846
				0.2528	1.40936	0.2528	1.17899			0.2528	0.837854	0.2528	0.439119			0.2528	0.195048	0.2528	0.129523			0.2528	0.0458495	0.2528	0.218533
				0.253	1.40981	0.253	1.17937			0.253	0.838354	0.253	0.439389			0.253	0.195131	0.253	0.12962			0.253	0.0458805	0.253	0.218606
				0.2532	1.41025	0.2532	1.17976			0.2532	0.838855	0.2532	0.439659			0.2532	0.195214	0.2532	0.129716			0.2532	0.0459115	0.2532	0.218679
				0.2534	1.4107	0.2534	1.18014			0.2534	0.839356	0.2534	0.43993			0.2534	0.195298	0.2534	0.129813			0.2534	0.0459426	0.2534	0.218752
				0.2536	1.41114	0.2536	1.18053			0.2536	0.839856	0.2536	0.4402			0.2536	0.195381	0.2536	0.129909			0.2536	0.0459736	0.2536	0.218825
				0.2538	1.41159	0.2538	1.18091			0.2538	0.840357	0.2538	0.440471			0.2538	0.195465	0.2538	0.130006			0.2538	0.0460047	0.2538	0.218898
				0.254	1.41203	0.254	1.1813			0.254	0.840857	0.254	0.440741			0.254	0.195548	0.254	0.130102			0.254	0.0460358	0.254	0.218971
				0.2542	1.41247	0.2542	1.18168			0.2542	0.841358	0.2542	0.441012			0.2542	0.195631	0.2542	0.130199			0.2542	0.0460669	0.2542	0.219045
				0.2544	1.41291	0.2544	1.18206			0.2544	0.841858	0.2544	0.441282			0.2544	0.195715	0.2544	0.130296			0.2544	0.046098	0.2544	0.219118
				0.2546	1.41336	0.2546	1.18244			0.2546	0.842359	0.2546	0.441553			0.2546	0.195798	0.2546	0.130392			0.2546	0.0461291	0.2546	0.219191
				0.2548	1.4138	0.2548	1.18283			0.2548	0.842859	0.2548	0.441824			0.2548	0.195882	0.2548	0.130489			0.2548	0.0461603	0.2548	0.219264
				0.255	1.41424	0.255	1.18321			0.255	0.843359	0.255	0.442095			0.255	0.195965	0.255	0.130586			0.255	0.0461915	0.255	0.219337
				0.2552	1.41467	0.2552	1.18359			0.2552	0.843859	0.2552	0.442366			0.2552	0.196049	0.2552	0.130683			0.2552	0.0462227	0.2552	0.21941
				0.2554	1.41511	0.2554	1.18397			0.2554	0.84436	0.2554	0.442637			0.2554	0.196133	0.2554	0.13078			0.2554	0.0462539	0.2554	0.219484
				0.2556	1.41555	0.2556	1.18435			0.2556	0.84486	0.2556	0.442908			0.2556	0.196216	0.2556	0.130877			0.2556	0.0462851	0.2556	0.219557
				0.2558	1.41599	0.2558	1.18473			0.2558	0.84536	0.2558	0.443179			0.2558	0.1963	0.2558	0.130974			0.2558	0.0463163	0.2558	0.21963
				0.256	1.41642	0.256	1.18511			0.256	0.84586	0.256	0.44345			0.256	0.196384	0.256	0.131071			0.256	0.0463476	0.256	0.219703
				0.2562	1.41686	0.2562	1.18549			0.2562	0.84636	0.2562	0.443721			0.2562	0.196467	0.2562	0.131168			0.2562	0.0463788	0.2562	0.219777
				0.2564	1.41729	0.2564	1.18587			0.2564	0.846859	0.2564	0.443992			0.2564	0.196551	0.2564	0.131266			0.2564	0.0464101	0.2564	0.21985
				0.2566	1.41773	0.2566	1.18624			0.2566	0.847359	0.2566	0.444264			0.2566	0.196635	0.2566	0.131363			0.2566	0.0464414	0.2566	0.219923
				0.2568	1.41816	0.2568	1.18662			0.2568	0.847859	0.2568	0.444535			0.2568	0.196718	0.2568	0.13146			0.2568	0.0464728	0.2568	0.219996
				0.257	1.41859	0.257	1.187			0.257	0.848359	0.257	0.444807			0.257	0.196802	0.257	0.131558			0.257	0.0465041	0.257	0.22007
				0.2572	1.41903	0.2572	1.18738			0.2572	0.848858	0.2572	0.445078			0.2572	0.196886	0.2572	0.131655			0.2572	0.0465355	0.2572	0.220143
				0.2574	1.41946	0.2574	1.18775			0.2574	0.849358	0.2574	0.44535			0.2574	0.19697	0.2574	0.131753			0.2574	0.0465668	0.2574	0.220216
				0.2576	1.41989	0.2576	1.18813			0.2576	0.849857	0.2576	0.445621			0.2576	0.197053	0.2576	0.13185			0.2576	0.0465982	0.2576	0.22029
				0.2578	1.42032	0.2578	1.18851			0.2578	0.850357	0.2578	0.445893			0.2578	0.197137	0.2578	0.131948			0.2578	0.0466296	0.2578	0.220363
				0.258	1.42075	0.258	1.18888			0.258	0.850856	0.258	0.446165			0.258	0.197221	0.258	0.132045			0.258	0.0466611	0.258	0.220436
				0.2582	1.42117	0.2582	1.18926			0.2582	0.851356	0.2582	0.446437			0.2582	0.197305	0.2582	0.132143			0.2582	0.0466925	0.2582	0.22051
				0.2584	1.4216	0.2584	1.18963			0.2584	0.851855	0.2584	0.446709			0.2584	0.197389	0.2584	0.132241			0.2584	0.046724	0.2584	0.220583
				0.2586	1.42203	0.2586	1.19			0.2586	0.852354	0.2586	0.44698			0.2586	0.197473	0.2586	0.132339			0.2586	0.0467554	0.2586	0.220656
				0.2588	1.42246	0.2588	1.19038			0.2588	0.852853	0.2588	0.447252			0.2588	0.197557	0.2588	0.132436			0.2588	0.0467869	0.2588	0.22073
				0.259	1.42288	0.259	1.19075			0.259	0.853352	0.259	0.447525			0.259	0.19764	0.259	0.132534			0.259	0.0468184	0.259	0.220803
				0.2592	1.42331	0.2592	1.19112			0.2592	0.853851	0.2592	0.447797			0.2592	0.197724	0.2592	0.132632			0.2592	0.04685	0.2592	0.220876
				0.2594	1.42373	0.2594	1.1915			0.2594	0.85435	0.2594	0.448069			0.2594	0.197808	0.2594	0.13273			0.2594	0.0468815	0.2594	0.22095
				0.2596	1.42415	0.2596	1.19187			0.2596	0.854849	0.2596	0.448341			0.2596	0.197892	0.2596	0.132828			0.2596	0.0469131	0.2596	0.221023
				0.2598	1.42458	0.2598	1.19224			0.2598	0.855348	0.2598	0.448613			0.2598	0.197976	0.2598	0.132927			0.2598	0.0469446	0.2598	0.221097
				0.26	1.425	0.26	1.19261			0.26	0.855847	0.26	0.448886			0.26	0.19806	0.26	0.133025			0.26	0.0469762	0.26	0.22117
				0.2602	1.42542	0.2602	1.19298			0.2602	0.856345	0.2602	0.449158			0.2602	0.198144	0.2602	0.133123			0.2602	0.0470078	0.2602	0.221243
				0.2604	1.42584	0.2604	1.19335			0.2604	0.856844	0.2604	0.449431			0.2604	0.198228	0.2604	0.133221			0.2604	0.0470395	0.2604	0.221317
				0.2606	1.42626	0.2606	1.19372			0.2606	0.857343	0.2606	0.449703			0.2606	0.198313	0.2606	0.13332			0.2606	0.0470711	0.2606	0.22139
				0.2608	1.42668	0.2608	1.19409			0.2608	0.857841	0.2608	0.449976			0.2608	0.198397	0.2608	0.133418			0.2608	0.0471028	0.2608	0.221464
				0.261	1.4271	0.261	1.19446			0.261	0.85834	0.261	0.450248			0.261	0.198481	0.261	0.133516			0.261	0.0471345	0.261	0.221537
				0.2612	1.42751	0.2612	1.19483			0.2612	0.858838	0.2612	0.450521			0.2612	0.198565	0.2612	0.133615			0.2612	0.0471662	0.2612	0.221611
				0.2614	1.42793	0.2614	1.1952			0.2614	0.859336	0.2614	0.450794			0.2614	0.198649	0.2614	0.133713			0.2614	0.0471979	0.2614	0.221684
				0.2616	1.42835	0.2616	1.19557			0.2616	0.859834	0.2616	0.451067			0.2616	0.198733	0.2616	0.133812			0.2616	0.0472296	0.2616	0.221758
				0.2618	1.42876	0.2618	1.19593			0.2618	0.860333	0.2618	0.451339			0.2618	0.198817	0.2618	0.133911			0.2618	0.0472614	0.2618	0.221831
				0.262	1.42918	0.262	1.1963			0.262	0.860831	0.262	0.451612			0.262	0.198902	0.262	0.134009			0.262	0.0472931	0.262	0.221905
				0.2622	1.42959	0.2622	1.19667			0.2622	0.861329	0.2622	0.451885			0.2622	0.198986	0.2622	0.134108			0.2622	0.0473249	0.2622	0.221978
				0.2624	1.43001	0.2624	1.19703			0.2624	0.861827	0.2624	0.452158			0.2624	0.19907	0.2624	0.134207			0.2624	0.0473567	0.2624	0.222052
				0.2626	1.43042	0.2626	1.1974			0.2626	0.862324	0.2626	0.452431			0.2626	0.199154	0.2626	0.134306			0.2626	0.0473885	0.2626	0.222125
				0.2628	1.43083	0.2628	1.19777			0.2628	0.862822	0.2628	0.452705			0.2628	0.199239	0.2628	0.134405			0.2628	0.0474204	0.2628	0.222199
				0.263	1.43124	0.263	1.19813			0.263	0.86332	0.263	0.452978			0.263	0.199323	0.263	0.134504			0.263	0.0474522	0.263	0.222273
				0.2632	1.43165	0.2632	1.19849			0.2632	0.863818	0.2632	0.453251			0.2632	0.199407	0.2632	0.134603			0.2632	0.0474841	0.2632	0.222346
				0.2634	1.43206	0.2634	1.19886			0.2634	0.864315	0.2634	0.453524			0.2634	0.199492	0.2634	0.134702			0.2634	0.047516	0.2634	0.22242
				0.2636	1.43247	0.2636	1.19922			0.2636	0.864813	0.2636	0.453798			0.2636	0.199576	0.2636	0.134801			0.2636	0.0475479	0.2636	0.222493
				0.2638	1.43288	0.2638	1.19959			0.2638	0.86531	0.2638	0.454071			0.2638	0.19966	0.2638	0.1349			0.2638	0.0475798	0.2638	0.222567
				0.264	1.43329	0.264	1.19995			0.264	0.865807	0.264	0.454345			0.264	0.199745	0.264	0.134999			0.264	0.0476117	0.264	0.222641
				0.2642	1.43369	0.2642	1.20031			0.2642	0.866305	0.2642	0.454618			0.2642	0.199829	0.2642	0.135098			0.2642	0.0476437	0.2642	0.222714
				0.2644	1.4341	0.2644	1.20067			0.2644	0.866802	0.2644	0.454892			0.2644	0.199914	0.2644	0.135198			0.2644	0.0476757	0.2644	0.222788
				0.2646	1.4345	0.2646	1.20103			0.2646	0.867299	0.2646	0.455166			0.2646	0.199998	0.2646	0.135297			0.2646	0.0477076	0.2646	0.222862
				0.2648	1.43491	0.2648	1.2014			0.2648	0.867796	0.2648	0.455439			0.2648	0.200083	0.2648	0.135396			0.2648	0.0477397	0.2648	0.222935
				0.265	1.43531	0.265	1.20176			0.265	0.868293	0.265	0.455713			0.265	0.200167	0.265	0.135496			0.265	0.0477717	0.265	0.223009
				0.2652	1.43571	0.2652	1.20212			0.2652	0.86879	0.2652	0.455987			0.2652	0.200252	0.2652	0.135595			0.2652	0.0478037	0.2652	0.223083
				0.2654	1.43612	0.2654	1.20248			0.2654	0.869287	0.2654	0.456261			0.2654	0.200336	0.2654	0.135695			0.2654	0.0478358	0.2654	0.223156
				0.2656	1.43652	0.2656	1.20284			0.2656	0.869784	0.2656	0.456535			0.2656	0.200421	0.2656	0.135795			0.2656	0.0478678	0.2656	0.22323
				0.2658	1.43692	0.2658	1.2032			0.2658	0.87028	0.2658	0.456809			0.2658	0.200505	0.2658	0.135894			0.2658	0.0478999	0.2658	0.223304
				0.266	1.43732	0.266	1.20355			0.266	0.870777	0.266	0.457083			0.266	0.20059	0.266	0.135994			0.266	0.0479321	0.266	0.223377
				0.2662	1.43772	0.2662	1.20391			0.2662	0.871273	0.2662	0.457357			0.2662	0.200675	0.2662	0.136094			0.2662	0.0479642	0.2662	0.223451
				0.2664	1.43812	0.2664	1.20427			0.2664	0.87177	0.2664	0.457631			0.2664	0.200759	0.2664	0.136194			0.2664	0.0479963	0.2664	0.223525
				0.2666	1.43852	0.2666	1.20463			0.2666	0.872266	0.2666	0.457905			0.2666	0.200844	0.2666	0.136294			0.2666	0.0480285	0.2666	0.223599
				0.2668	1.43891	0.2668	1.20498			0.2668	0.872762	0.2668	0.45818			0.2668	0.200928	0.2668	0.136394			0.2668	0.0480607	0.2668	0.223672
				0.267	1.43931	0.267	1.20534			0.267	0.873259	0.267	0.458454			0.267	0.201013	0.267	0.136494			0.267	0.0480929	0.267	0.223746
				0.2672	1.4397	0.2672	1.2057			0.2672	0.873755	0.2672	0.458728			0.2672	0.201098	0.2672	0.136594			0.2672	0.0481251	0.2672	0.22382
				0.2674	1.4401	0.2674	1.20605			0.2674	0.874251	0.2674	0.459003			0.2674	0.201183	0.2674	0.136694			0.2674	0.0481573	0.2674	0.223894
				0.2676	1.44049	0.2676	1.20641			0.2676	0.874747	0.2676	0.459277			0.2676	0.201267	0.2676	0.136794			0.2676	0.0481896	0.2676	0.223967
				0.2678	1.44089	0.2678	1.20676			0.2678	0.875243	0.2678	0.459552			0.2678	0.201352	0.2678	0.136894			0.2678	0.0482218	0.2678	0.224041
				0.268	1.44128	0.268	1.20712			0.268	0.875738	0.268	0.459826			0.268	0.201437	0.268	0.136994			0.268	0.0482541	0.268	0.224115
				0.2682	1.44167	0.2682	1.20747			0.2682	0.876234	0.2682	0.460101			0.2682	0.201522	0.2682	0.137095			0.2682	0.0482864	0.2682	0.224189
				0.2684	1.44206	0.2684	1.20782			0.2684	0.87673	0.2684	0.460376			0.2684	0.201606	0.2684	0.137195			0.2684	0.0483187	0.2684	0.224263
				0.2686	1.44245	0.2686	1.20818			0.2686	0.877225	0.2686	0.460651			0.2686	0.201691	0.2686	0.137295			0.2686	0.0483511	0.2686	0.224337
				0.2688	1.44284	0.2688	1.20853			0.2688	0.877721	0.2688	0.460925			0.2688	0.201776	0.2688	0.137396			0.2688	0.0483834	0.2688	0.22441
				0.269	1.44323	0.269	1.20888			0.269	0.878216	0.269	0.4612			0.269	0.201861	0.269	0.137496			0.269	0.0484158	0.269	0.224484
				0.2692	1.44362	0.2692	1.20923			0.2692	0.878711	0.2692	0.461475			0.2692	0.201946	0.2692	0.137597			0.2692	0.0484482	0.2692	0.224558
				0.2694	1.44401	0.2694	1.20958			0.2694	0.879206	0.2694	0.46175			0.2694	0.202031	0.2694	0.137698			0.2694	0.0484806	0.2694	0.224632
				0.2696	1.44439	0.2696	1.20994			0.2696	0.879702	0.2696	0.462025			0.2696	0.202116	0.2696	0.137798			0.2696	0.048513	0.2696	0.224706
				0.2698	1.44478	0.2698	1.21029			0.2698	0.880197	0.2698	0.4623			0.2698	0.202201	0.2698	0.137899			0.2698	0.0485454	0.2698	0.22478
				0.27	1.44517	0.27	1.21064			0.27	0.880691	0.27	0.462576			0.27	0.202286	0.27	0.138			0.27	0.0485779	0.27	0.224854
				0.2702	1.44555	0.2702	1.21098			0.2702	0.881186	0.2702	0.462851			0.2702	0.202371	0.2702	0.138101			0.2702	0.0486104	0.2702	0.224928
				0.2704	1.44593	0.2704	1.21133			0.2704	0.881681	0.2704	0.463126			0.2704	0.202456	0.2704	0.138201			0.2704	0.0486428	0.2704	0.225002
				0.2706	1.44632	0.2706	1.21168			0.2706	0.882176	0.2706	0.463401			0.2706	0.202541	0.2706	0.138302			0.2706	0.0486753	0.2706	0.225076
				0.2708	1.4467	0.2708	1.21203			0.2708	0.88267	0.2708	0.463677			0.2708	0.202626	0.2708	0.138403			0.2708	0.0487079	0.2708	0.22515
				0.271	1.44708	0.271	1.21238			0.271	0.883165	0.271	0.463952			0.271	0.202711	0.271	0.138504			0.271	0.0487404	0.271	0.225223
				0.2712	1.44746	0.2712	1.21273			0.2712	0.883659	0.2712	0.464228			0.2712	0.202796	0.2712	0.138606			0.2712	0.048773	0.2712	0.225297
				0.2714	1.44784	0.2714	1.21307			0.2714	0.884153	0.2714	0.464503			0.2714	0.202881	0.2714	0.138707			0.2714	0.0488056	0.2714	0.225371
				0.2716	1.44822	0.2716	1.21342			0.2716	0.884648	0.2716	0.464779			0.2716	0.202966	0.2716	0.138808			0.2716	0.0488382	0.2716	0.225445
				0.2718	1.4486	0.2718	1.21377			0.2718	0.885142	0.2718	0.465054			0.2718	0.203051	0.2718	0.138909			0.2718	0.0488708	0.2718	0.225519
				0.272	1.44898	0.272	1.21411			0.272	0.885636	0.272	0.46533			0.272	0.203136	0.272	0.13901			0.272	0.0489034	0.272	0.225593
				0.2722	1.44935	0.2722	1.21446			0.2722	0.88613	0.2722	0.465606			0.2722	0.203222	0.2722	0.139112			0.2722	0.048936	0.2722	0.225667
				0.2724	1.44973	0.2724	1.2148			0.2724	0.886623	0.2724	0.465882			0.2724	0.203307	0.2724	0.139213			0.2724	0.0489687	0.2724	0.225741
				0.2726	1.4501	0.2726	1.21514			0.2726	0.887117	0.2726	0.466157			0.2726	0.203392	0.2726	0.139315			0.2726	0.0490014	0.2726	0.225816
				0.2728	1.45048	0.2728	1.21549			0.2728	0.887611	0.2728	0.466433			0.2728	0.203477	0.2728	0.139416			0.2728	0.0490341	0.2728	0.22589
				0.273	1.45085	0.273	1.21583			0.273	0.888104	0.273	0.466709			0.273	0.203562	0.273	0.139518			0.273	0.0490668	0.273	0.225964
				0.2732	1.45123	0.2732	1.21618			0.2732	0.888598	0.2732	0.466985			0.2732	0.203648	0.2732	0.139619			0.2732	0.0490995	0.2732	0.226038
				0.2734	1.4516	0.2734	1.21652			0.2734	0.889091	0.2734	0.467261			0.2734	0.203733	0.2734	0.139721			0.2734	0.0491323	0.2734	0.226112
				0.2736	1.45197	0.2736	1.21686			0.2736	0.889584	0.2736	0.467537			0.2736	0.203818	0.2736	0.139823			0.2736	0.0491651	0.2736	0.226186
				0.2738	1.45234	0.2738	1.2172			0.2738	0.890078	0.2738	0.467814			0.2738	0.203904	0.2738	0.139925			0.2738	0.0491978	0.2738	0.22626
				0.274	1.45271	0.274	1.21754			0.274	0.890571	0.274	0.46809			0.274	0.203989	0.274	0.140026			0.274	0.0492307	0.274	0.226334
				0.2742	1.45308	0.2742	1.21788			0.2742	0.891064	0.2742	0.468366			0.2742	0.204074	0.2742	0.140128			0.2742	0.0492635	0.2742	0.226408
				0.2744	1.45345	0.2744	1.21822			0.2744	0.891556	0.2744	0.468642			0.2744	0.20416	0.2744	0.14023			0.2744	0.0492963	0.2744	0.226482
				0.2746	1.45382	0.2746	1.21856			0.2746	0.892049	0.2746	0.468919			0.2746	0.204245	0.2746	0.140332			0.2746	0.0493292	0.2746	0.226556
				0.2748	1.45418	0.2748	1.2189			0.2748	0.892542	0.2748	0.469195			0.2748	0.20433	0.2748	0.140434			0.2748	0.049362	0.2748	0.226631
				0.275	1.45455	0.275	1.21924			0.275	0.893034	0.275	0.469472			0.275	0.204416	0.275	0.140536			0.275	0.0493949	0.275	0.226705
				0.2752	1.45491	0.2752	1.21958			0.2752	0.893527	0.2752	0.469748			0.2752	0.204501	0.2752	0.140638			0.2752	0.0494278	0.2752	0.226779
				0.2754	1.45528	0.2754	1.21992			0.2754	0.894019	0.2754	0.470025			0.2754	0.204587	0.2754	0.140741			0.2754	0.0494608	0.2754	0.226853
				0.2756	1.45564	0.2756	1.22026			0.2756	0.894512	0.2756	0.470301			0.2756	0.204672	0.2756	0.140843			0.2756	0.0494937	0.2756	0.226927
				0.2758	1.45601	0.2758	1.22059			0.2758	0.895004	0.2758	0.470578			0.2758	0.204758	0.2758	0.140945			0.2758	0.0495267	0.2758	0.227001
				0.276	1.45637	0.276	1.22093			0.276	0.895496	0.276	0.470855			0.276	0.204843	0.276	0.141048			0.276	0.0495597	0.276	0.227076
				0.2762	1.45673	0.2762	1.22127			0.2762	0.895988	0.2762	0.471131			0.2762	0.204929	0.2762	0.14115			0.2762	0.0495927	0.2762	0.22715
				0.2764	1.45709	0.2764	1.2216			0.2764	0.89648	0.2764	0.471408			0.2764	0.205014	0.2764	0.141252			0.2764	0.0496257	0.2764	0.227224
				0.2766	1.45745	0.2766	1.22194			0.2766	0.896971	0.2766	0.471685			0.2766	0.2051	0.2766	0.141355			0.2766	0.0496587	0.2766	0.227298
				0.2768	1.45781	0.2768	1.22227			0.2768	0.897463	0.2768	0.471962			0.2768	0.205186	0.2768	0.141458			0.2768	0.0496918	0.2768	0.227372
				0.277	1.45817	0.277	1.22261			0.277	0.897954	0.277	0.472239			0.277	0.205271	0.277	0.14156			0.277	0.0497248	0.277	0.227447
				0.2772	1.45853	0.2772	1.22294			0.2772	0.898446	0.2772	0.472516			0.2772	0.205357	0.2772	0.141663			0.2772	0.0497579	0.2772	0.227521
				0.2774	1.45888	0.2774	1.22327			0.2774	0.898937	0.2774	0.472793			0.2774	0.205443	0.2774	0.141766			0.2774	0.049791	0.2774	0.227595
				0.2776	1.45924	0.2776	1.22361			0.2776	0.899428	0.2776	0.47307			0.2776	0.205528	0.2776	0.141868			0.2776	0.0498241	0.2776	0.227669
				0.2778	1.45959	0.2778	1.22394			0.2778	0.89992	0.2778	0.473347			0.2778	0.205614	0.2778	0.141971			0.2778	0.0498573	0.2778	0.227744
				0.278	1.45995	0.278	1.22427			0.278	0.900411	0.278	0.473625			0.278	0.2057	0.278	0.142074			0.278	0.0498904	0.278	0.227818
				0.2782	1.4603	0.2782	1.2246			0.2782	0.900902	0.2782	0.473902			0.2782	0.205785	0.2782	0.142177			0.2782	0.0499236	0.2782	0.227892
				0.2784	1.46066	0.2784	1.22493			0.2784	0.901392	0.2784	0.474179			0.2784	0.205871	0.2784	0.14228			0.2784	0.0499568	0.2784	0.227967
				0.2786	1.46101	0.2786	1.22526			0.2786	0.901883	0.2786	0.474456			0.2786	0.205957	0.2786	0.142383			0.2786	0.04999	0.2786	0.228041
				0.2788	1.46136	0.2788	1.22559			0.2788	0.902374	0.2788	0.474734			0.2788	0.206043	0.2788	0.142486			0.2788	0.0500232	0.2788	0.228115
				0.279	1.46171	0.279	1.22592			0.279	0.902864	0.279	0.475011			0.279	0.206128	0.279	0.142589			0.279	0.0500565	0.279	0.22819
				0.2792	1.46206	0.2792	1.22625			0.2792	0.903354	0.2792	0.475289			0.2792	0.206214	0.2792	0.142692			0.2792	0.0500897	0.2792	0.228264
				0.2794	1.46241	0.2794	1.22658			0.2794	0.903845	0.2794	0.475566			0.2794	0.2063	0.2794	0.142796			0.2794	0.050123	0.2794	0.228338
				0.2796	1.46276	0.2796	1.22691			0.2796	0.904335	0.2796	0.475844			0.2796	0.206386	0.2796	0.142899			0.2796	0.0501563	0.2796	0.228413
				0.2798	1.4631	0.2798	1.22724			0.2798	0.904825	0.2798	0.476122			0.2798	0.206472	0.2798	0.143002			0.2798	0.0501896	0.2798	0.228487
				0.28	1.46345	0.28	1.22757			0.28	0.905315	0.28	0.476399			0.28	0.206558	0.28	0.143106			0.28	0.0502229	0.28	0.228561
				0.2802	1.4638	0.2802	1.22789			0.2802	0.905805	0.2802	0.476677			0.2802	0.206644	0.2802	0.143209			0.2802	0.0502563	0.2802	0.228636
				0.2804	1.46414	0.2804	1.22822			0.2804	0.906294	0.2804	0.476955			0.2804	0.20673	0.2804	0.143313			0.2804	0.0502897	0.2804	0.22871
				0.2806	1.46449	0.2806	1.22855			0.2806	0.906784	0.2806	0.477233			0.2806	0.206816	0.2806	0.143416			0.2806	0.050323	0.2806	0.228785
				0.2808	1.46483	0.2808	1.22887			0.2808	0.907273	0.2808	0.477511			0.2808	0.206901	0.2808	0.14352			0.2808	0.0503564	0.2808	0.228859
				0.281	1.46517	0.281	1.2292			0.281	0.907763	0.281	0.477789			0.281	0.206987	0.281	0.143624			0.281	0.0503899	0.281	0.228933
				0.2812	1.46552	0.2812	1.22952			0.2812	0.908252	0.2812	0.478067			0.2812	0.207073	0.2812	0.143727			0.2812	0.0504233	0.2812	0.229008
				0.2814	1.46586	0.2814	1.22985			0.2814	0.908741	0.2814	0.478345			0.2814	0.207159	0.2814	0.143831			0.2814	0.0504568	0.2814	0.229082
				0.2816	1.4662	0.2816	1.23017			0.2816	0.90923	0.2816	0.478623			0.2816	0.207246	0.2816	0.143935			0.2816	0.0504902	0.2816	0.229157
				0.2818	1.46654	0.2818	1.23049			0.2818	0.909719	0.2818	0.478901			0.2818	0.207332	0.2818	0.144039			0.2818	0.0505237	0.2818	0.229231
				0.282	1.46688	0.282	1.23082			0.282	0.910208	0.282	0.479179			0.282	0.207418	0.282	0.144143			0.282	0.0505572	0.282	0.229306
				0.2822	1.46721	0.2822	1.23114			0.2822	0.910697	0.2822	0.479457			0.2822	0.207504	0.2822	0.144247			0.2822	0.0505908	0.2822	0.22938
				0.2824	1.46755	0.2824	1.23146			0.2824	0.911185	0.2824	0.479736			0.2824	0.20759	0.2824	0.144351			0.2824	0.0506243	0.2824	0.229455
				0.2826	1.46789	0.2826	1.23178			0.2826	0.911674	0.2826	0.480014			0.2826	0.207676	0.2826	0.144455			0.2826	0.0506579	0.2826	0.229529
				0.2828	1.46822	0.2828	1.2321			0.2828	0.912162	0.2828	0.480292			0.2828	0.207762	0.2828	0.144559			0.2828	0.0506914	0.2828	0.229604
				0.283	1.46856	0.283	1.23243			0.283	0.91265	0.283	0.480571			0.283	0.207848	0.283	0.144663			0.283	0.050725	0.283	0.229678
				0.2832	1.46889	0.2832	1.23275			0.2832	0.913138	0.2832	0.480849			0.2832	0.207935	0.2832	0.144767			0.2832	0.0507586	0.2832	0.229753
				0.2834	1.46923	0.2834	1.23307			0.2834	0.913626	0.2834	0.481128			0.2834	0.208021	0.2834	0.144872			0.2834	0.0507923	0.2834	0.229827
				0.2836	1.46956	0.2836	1.23338			0.2836	0.914114	0.2836	0.481406			0.2836	0.208107	0.2836	0.144976			0.2836	0.0508259	0.2836	0.229902
				0.2838	1.46989	0.2838	1.2337			0.2838	0.914602	0.2838	0.481685			0.2838	0.208193	0.2838	0.145081			0.2838	0.0508596	0.2838	0.229976
				0.284	1.47022	0.284	1.23402			0.284	0.915089	0.284	0.481964			0.284	0.208279	0.284	0.145185			0.284	0.0508933	0.284	0.230051
				0.2842	1.47055	0.2842	1.23434			0.2842	0.915577	0.2842	0.482242			0.2842	0.208366	0.2842	0.14529			0.2842	0.050927	0.2842	0.230125
				0.2844	1.47088	0.2844	1.23466			0.2844	0.916064	0.2844	0.482521			0.2844	0.208452	0.2844	0.145394			0.2844	0.0509607	0.2844	0.2302
				0.2846	1.47121	0.2846	1.23497			0.2846	0.916551	0.2846	0.4828			0.2846	0.208538	0.2846	0.145499			0.2846	0.0509944	0.2846	0.230275
				0.2848	1.47154	0.2848	1.23529			0.2848	0.917038	0.2848	0.483079			0.2848	0.208625	0.2848	0.145603			0.2848	0.0510282	0.2848	0.230349
				0.285	1.47186	0.285	1.23561			0.285	0.917525	0.285	0.483358			0.285	0.208711	0.285	0.145708			0.285	0.051062	0.285	0.230424
				0.2852	1.47219	0.2852	1.23592			0.2852	0.918012	0.2852	0.483637			0.2852	0.208797	0.2852	0.145813			0.2852	0.0510958	0.2852	0.230498
				0.2854	1.47252	0.2854	1.23624			0.2854	0.918499	0.2854	0.483916			0.2854	0.208884	0.2854	0.145918			0.2854	0.0511296	0.2854	0.230573
				0.2856	1.47284	0.2856	1.23655			0.2856	0.918986	0.2856	0.484195			0.2856	0.20897	0.2856	0.146023			0.2856	0.0511634	0.2856	0.230648
				0.2858	1.47316	0.2858	1.23687			0.2858	0.919472	0.2858	0.484474			0.2858	0.209057	0.2858	0.146128			0.2858	0.0511973	0.2858	0.230722
				0.286	1.47349	0.286	1.23718			0.286	0.919958	0.286	0.484753			0.286	0.209143	0.286	0.146233			0.286	0.0512311	0.286	0.230797
				0.2862	1.47381	0.2862	1.23749			0.2862	0.920445	0.2862	0.485032			0.2862	0.20923	0.2862	0.146338			0.2862	0.051265	0.2862	0.230872
				0.2864	1.47413	0.2864	1.23781			0.2864	0.920931	0.2864	0.485311			0.2864	0.209316	0.2864	0.146443			0.2864	0.0512989	0.2864	0.230946
				0.2866	1.47445	0.2866	1.23812			0.2866	0.921417	0.2866	0.48559			0.2866	0.209402	0.2866	0.146548			0.2866	0.0513328	0.2866	0.231021
				0.2868	1.47477	0.2868	1.23843			0.2868	0.921903	0.2868	0.48587			0.2868	0.209489	0.2868	0.146653			0.2868	0.0513668	0.2868	0.231096
				0.287	1.47509	0.287	1.23874			0.287	0.922388	0.287	0.486149			0.287	0.209576	0.287	0.146758			0.287	0.0514007	0.287	0.23117
				0.2872	1.47541	0.2872	1.23905			0.2872	0.922874	0.2872	0.486429			0.2872	0.209662	0.2872	0.146864			0.2872	0.0514347	0.2872	0.231245
				0.2874	1.47573	0.2874	1.23936			0.2874	0.92336	0.2874	0.486708			0.2874	0.209749	0.2874	0.146969			0.2874	0.0514687	0.2874	0.23132
				0.2876	1.47604	0.2876	1.23967			0.2876	0.923845	0.2876	0.486987			0.2876	0.209835	0.2876	0.147074			0.2876	0.0515027	0.2876	0.231395
				0.2878	1.47636	0.2878	1.23998			0.2878	0.92433	0.2878	0.487267			0.2878	0.209922	0.2878	0.14718			0.2878	0.0515367	0.2878	0.231469
				0.288	1.47667	0.288	1.24029			0.288	0.924815	0.288	0.487547			0.288	0.210008	0.288	0.147285			0.288	0.0515707	0.288	0.231544
				0.2882	1.47699	0.2882	1.2406			0.2882	0.9253	0.2882	0.487826			0.2882	0.210095	0.2882	0.147391			0.2882	0.0516048	0.2882	0.231619
				0.2884	1.4773	0.2884	1.24091			0.2884	0.925785	0.2884	0.488106			0.2884	0.210182	0.2884	0.147497			0.2884	0.0516389	0.2884	0.231694
				0.2886	1.47761	0.2886	1.24121			0.2886	0.92627	0.2886	0.488385			0.2886	0.210268	0.2886	0.147602			0.2886	0.051673	0.2886	0.231768
				0.2888	1.47793	0.2888	1.24152			0.2888	0.926754	0.2888	0.488665			0.2888	0.210355	0.2888	0.147708			0.2888	0.0517071	0.2888	0.231843
				0.289	1.47824	0.289	1.24183			0.289	0.927239	0.289	0.488945			0.289	0.210442	0.289	0.147814			0.289	0.0517412	0.289	0.231918
				0.2892	1.47855	0.2892	1.24213			0.2892	0.927723	0.2892	0.489225			0.2892	0.210529	0.2892	0.14792			0.2892	0.0517754	0.2892	0.231993
				0.2894	1.47886	0.2894	1.24244			0.2894	0.928207	0.2894	0.489505			0.2894	0.210615	0.2894	0.148026			0.2894	0.0518095	0.2894	0.232067
				0.2896	1.47916	0.2896	1.24274			0.2896	0.928691	0.2896	0.489785			0.2896	0.210702	0.2896	0.148132			0.2896	0.0518437	0.2896	0.232142
				0.2898	1.47947	0.2898	1.24305			0.2898	0.929175	0.2898	0.490065			0.2898	0.210789	0.2898	0.148238			0.2898	0.0518779	0.2898	0.232217
				0.29	1.47978	0.29	1.24335			0.29	0.929659	0.29	0.490345			0.29	0.210876	0.29	0.148344			0.29	0.0519121	0.29	0.232292
				0.2902	1.48008	0.2902	1.24366			0.2902	0.930142	0.2902	0.490625			0.2902	0.210963	0.2902	0.14845			0.2902	0.0519464	0.2902	0.232367
				0.2904	1.48039	0.2904	1.24396			0.2904	0.930626	0.2904	0.490905			0.2904	0.211049	0.2904	0.148556			0.2904	0.0519806	0.2904	0.232442
				0.2906	1.48069	0.2906	1.24426			0.2906	0.931109	0.2906	0.491185			0.2906	0.211136	0.2906	0.148662			0.2906	0.0520149	0.2906	0.232516
				0.2908	1.481	0.2908	1.24457			0.2908	0.931592	0.2908	0.491465			0.2908	0.211223	0.2908	0.148768			0.2908	0.0520492	0.2908	0.232591
				0.291	1.4813	0.291	1.24487			0.291	0.932076	0.291	0.491745			0.291	0.21131	0.291	0.148875			0.291	0.0520835	0.291	0.232666
				0.2912	1.4816	0.2912	1.24517			0.2912	0.932558	0.2912	0.492026			0.2912	0.211397	0.2912	0.148981			0.2912	0.0521178	0.2912	0.232741
				0.2914	1.4819	0.2914	1.24547			0.2914	0.933041	0.2914	0.492306			0.2914	0.211484	0.2914	0.149088			0.2914	0.0521522	0.2914	0.232816
				0.2916	1.4822	0.2916	1.24577			0.2916	0.933524	0.2916	0.492586			0.2916	0.211571	0.2916	0.149194			0.2916	0.0521866	0.2916	0.232891
				0.2918	1.4825	0.2918	1.24607			0.2918	0.934006	0.2918	0.492867			0.2918	0.211658	0.2918	0.149301			0.2918	0.0522209	0.2918	0.232966
				0.292	1.4828	0.292	1.24637			0.292	0.934489	0.292	0.493147			0.292	0.211745	0.292	0.149407			0.292	0.0522553	0.292	0.233041
				0.2922	1.4831	0.2922	1.24667			0.2922	0.934971	0.2922	0.493428			0.2922	0.211832	0.2922	0.149514			0.2922	0.0522898	0.2922	0.233116
				0.2924	1.4834	0.2924	1.24697			0.2924	0.935453	0.2924	0.493708			0.2924	0.211919	0.2924	0.14962			0.2924	0.0523242	0.2924	0.233191
				0.2926	1.48369	0.2926	1.24726			0.2926	0.935935	0.2926	0.493989			0.2926	0.212006	0.2926	0.149727			0.2926	0.0523587	0.2926	0.233265
				0.2928	1.48399	0.2928	1.24756			0.2928	0.936417	0.2928	0.494269			0.2928	0.212093	0.2928	0.149834			0.2928	0.0523931	0.2928	0.23334
				0.293	1.48428	0.293	1.24786			0.293	0.936899	0.293	0.49455			0.293	0.21218	0.293	0.149941			0.293	0.0524276	0.293	0.233415
				0.2932	1.48458	0.2932	1.24815			0.2932	0.93738	0.2932	0.494831			0.2932	0.212267	0.2932	0.150048			0.2932	0.0524621	0.2932	0.23349
				0.2934	1.48487	0.2934	1.24845			0.2934	0.937862	0.2934	0.495111			0.2934	0.212354	0.2934	0.150155			0.2934	0.0524967	0.2934	0.233565
				0.2936	1.48516	0.2936	1.24875			0.2936	0.938343	0.2936	0.495392			0.2936	0.212441	0.2936	0.150262			0.2936	0.0525312	0.2936	0.23364
				0.2938	1.48545	0.2938	1.24904			0.2938	0.938824	0.2938	0.495673			0.2938	0.212528	0.2938	0.150369			0.2938	0.0525658	0.2938	0.233715
				0.294	1.48574	0.294	1.24934			0.294	0.939305	0.294	0.495954			0.294	0.212616	0.294	0.150476			0.294	0.0526003	0.294	0.23379
				0.2942	1.48603	0.2942	1.24963			0.2942	0.939786	0.2942	0.496235			0.2942	0.212703	0.2942	0.150583			0.2942	0.0526349	0.2942	0.233865
				0.2944	1.48632	0.2944	1.24992			0.2944	0.940266	0.2944	0.496516			0.2944	0.21279	0.2944	0.15069			0.2944	0.0526696	0.2944	0.23394
				0.2946	1.48661	0.2946	1.25022			0.2946	0.940747	0.2946	0.496797			0.2946	0.212877	0.2946	0.150798			0.2946	0.0527042	0.2946	0.234015
				0.2948	1.4869	0.2948	1.25051			0.2948	0.941227	0.2948	0.497078			0.2948	0.212964	0.2948	0.150905			0.2948	0.0527389	0.2948	0.23409
				0.295	1.48719	0.295	1.2508			0.295	0.941708	0.295	0.497359			0.295	0.213052	0.295	0.151012			0.295	0.0527735	0.295	0.234165
				0.2952	1.48747	0.2952	1.25109			0.2952	0.942188	0.2952	0.49764			0.2952	0.213139	0.2952	0.15112			0.2952	0.0528082	0.2952	0.234241
				0.2954	1.48776	0.2954	1.25138			0.2954	0.942668	0.2954	0.497921			0.2954	0.213226	0.2954	0.151227			0.2954	0.0528429	0.2954	0.234316
				0.2956	1.48804	0.2956	1.25167			0.2956	0.943147	0.2956	0.498202			0.2956	0.213313	0.2956	0.151335			0.2956	0.0528776	0.2956	0.234391
				0.2958	1.48832	0.2958	1.25196			0.2958	0.943627	0.2958	0.498483			0.2958	0.213401	0.2958	0.151442			0.2958	0.0529124	0.2958	0.234466
				0.296	1.4886	0.296	1.25225			0.296	0.944107	0.296	0.498765			0.296	0.213488	0.296	0.15155			0.296	0.0529472	0.296	0.234541
				0.2962	1.48889	0.2962	1.25254			0.2962	0.944586	0.2962	0.499046			0.2962	0.213576	0.2962	0.151658			0.2962	0.0529819	0.2962	0.234616
				0.2964	1.48917	0.2964	1.25283			0.2964	0.945065	0.2964	0.499327			0.2964	0.213663	0.2964	0.151765			0.2964	0.0530167	0.2964	0.234691
				0.2966	1.48945	0.2966	1.25312			0.2966	0.945544	0.2966	0.499609			0.2966	0.21375	0.2966	0.151873			0.2966	0.0530515	0.2966	0.234766
				0.2968	1.48973	0.2968	1.25341			0.2968	0.946023	0.2968	0.49989			0.2968	0.213838	0.2968	0.151981			0.2968	0.0530864	0.2968	0.234841
				0.297	1.49	0.297	1.2537			0.297	0.946502	0.297	0.500171			0.297	0.213925	0.297	0.152089			0.297	0.0531212	0.297	0.234916
				0.2972	1.49028	0.2972	1.25398			0.2972	0.94698	0.2972	0.500453			0.2972	0.214013	0.2972	0.152197			0.2972	0.0531561	0.2972	0.234992
				0.2974	1.49056	0.2974	1.25427			0.2974	0.947459	0.2974	0.500734			0.2974	0.2141	0.2974	0.152305			0.2974	0.053191	0.2974	0.235067
				0.2976	1.49083	0.2976	1.25455			0.2976	0.947937	0.2976	0.501016			0.2976	0.214188	0.2976	0.152413			0.2976	0.0532259	0.2976	0.235142
				0.2978	1.49111	0.2978	1.25484			0.2978	0.948415	0.2978	0.501298			0.2978	0.214275	0.2978	0.152521			0.2978	0.0532608	0.2978	0.235217
				0.298	1.49138	0.298	1.25512			0.298	0.948893	0.298	0.501579			0.298	0.214363	0.298	0.152629			0.298	0.0532958	0.298	0.235292
				0.2982	1.49166	0.2982	1.25541			0.2982	0.949371	0.2982	0.501861			0.2982	0.21445	0.2982	0.152738			0.2982	0.0533307	0.2982	0.235367
				0.2984	1.49193	0.2984	1.25569			0.2984	0.949849	0.2984	0.502143			0.2984	0.214538	0.2984	0.152846			0.2984	0.0533657	0.2984	0.235443
				0.2986	1.4922	0.2986	1.25598			0.2986	0.950326	0.2986	0.502424			0.2986	0.214625	0.2986	0.152954			0.2986	0.0534007	0.2986	0.235518
				0.2988	1.49247	0.2988	1.25626			0.2988	0.950804	0.2988	0.502706			0.2988	0.214713	0.2988	0.153063			0.2988	0.0534357	0.2988	0.235593
				0.299	1.49274	0.299	1.25654			0.299	0.951281	0.299	0.502988			0.299	0.2148	0.299	0.153171			0.299	0.0534708	0.299	0.235668
				0.2992	1.49301	0.2992	1.25682			0.2992	0.951758	0.2992	0.50327			0.2992	0.214888	0.2992	0.15328			0.2992	0.0535058	0.2992	0.235744
				0.2994	1.49328	0.2994	1.2571			0.2994	0.952235	0.2994	0.503552			0.2994	0.214976	0.2994	0.153388			0.2994	0.0535409	0.2994	0.235819
				0.2996	1.49354	0.2996	1.25738			0.2996	0.952711	0.2996	0.503834			0.2996	0.215063	0.2996	0.153497			0.2996	0.053576	0.2996	0.235894
				0.2998	1.49381	0.2998	1.25766			0.2998	0.953188	0.2998	0.504116			0.2998	0.215151	0.2998	0.153605			0.2998	0.0536111	0.2998	0.235969
				0.3	1.49408	0.3	1.25794			0.3	0.953664	0.3	0.504398			0.3	0.215239	0.3	0.153714			0.3	0.0536462	0.3	0.236045
				0.3002	1.49434	0.3002	1.25822			0.3002	0.954141	0.3002	0.50468			0.3002	0.215326	0.3002	0.153823			0.3002	0.0536814	0.3002	0.23612
				0.3004	1.4946	0.3004	1.2585			0.3004	0.954617	0.3004	0.504962			0.3004	0.215414	0.3004	0.153932			0.3004	0.0537165	0.3004	0.236195
				0.3006	1.49487	0.3006	1.25878			0.3006	0.955093	0.3006	0.505244			0.3006	0.215502	0.3006	0.154041			0.3006	0.0537517	0.3006	0.23627
				0.3008	1.49513	0.3008	1.25906			0.3008	0.955569	0.3008	0.505526			0.3008	0.21559	0.3008	0.15415			0.3008	0.0537869	0.3008	0.236346
				0.301	1.49539	0.301	1.25934			0.301	0.956044	0.301	0.505809			0.301	0.215677	0.301	0.154259			0.301	0.0538221	0.301	0.236421
				0.3012	1.49565	0.3012	1.25961			0.3012	0.95652	0.3012	0.506091			0.3012	0.215765	0.3012	0.154368			0.3012	0.0538573	0.3012	0.236496
				0.3014	1.49591	0.3014	1.25989			0.3014	0.956995	0.3014	0.506373			0.3014	0.215853	0.3014	0.154477			0.3014	0.0538926	0.3014	0.236572
				0.3016	1.49617	0.3016	1.26016			0.3016	0.95747	0.3016	0.506656			0.3016	0.215941	0.3016	0.154586			0.3016	0.0539279	0.3016	0.236647
				0.3018	1.49643	0.3018	1.26044			0.3018	0.957945	0.3018	0.506938			0.3018	0.216029	0.3018	0.154695			0.3018	0.0539632	0.3018	0.236722
				0.302	1.49669	0.302	1.26071			0.302	0.95842	0.302	0.50722			0.302	0.216117	0.302	0.154804			0.302	0.0539985	0.302	0.236798
				0.3022	1.49694	0.3022	1.26099			0.3022	0.958894	0.3022	0.507503			0.3022	0.216205	0.3022	0.154914			0.3022	0.0540338	0.3022	0.236873
				0.3024	1.4972	0.3024	1.26126			0.3024	0.959369	0.3024	0.507785			0.3024	0.216292	0.3024	0.155023			0.3024	0.0540691	0.3024	0.236948
				0.3026	1.49745	0.3026	1.26154			0.3026	0.959843	0.3026	0.508068			0.3026	0.21638	0.3026	0.155132			0.3026	0.0541045	0.3026	0.237024
				0.3028	1.49771	0.3028	1.26181			0.3028	0.960317	0.3028	0.50835			0.3028	0.216468	0.3028	0.155242			0.3028	0.0541399	0.3028	0.237099
				0.303	1.49796	0.303	1.26208			0.303	0.960791	0.303	0.508633			0.303	0.216556	0.303	0.155351			0.303	0.0541753	0.303	0.237174
				0.3032	1.49821	0.3032	1.26235			0.3032	0.961265	0.3032	0.508916			0.3032	0.216644	0.3032	0.155461			0.3032	0.0542107	0.3032	0.23725
				0.3034	1.49846	0.3034	1.26262			0.3034	0.961739	0.3034	0.509198			0.3034	0.216732	0.3034	0.15557			0.3034	0.0542461	0.3034	0.237325
				0.3036	1.49871	0.3036	1.2629			0.3036	0.962212	0.3036	0.509481			0.3036	0.21682	0.3036	0.15568			0.3036	0.0542816	0.3036	0.237401
				0.3038	1.49896	0.3038	1.26317			0.3038	0.962686	0.3038	0.509764			0.3038	0.216908	0.3038	0.15579			0.3038	0.0543171	0.3038	0.237476
				0.304	1.49921	0.304	1.26344			0.304	0.963159	0.304	0.510046			0.304	0.216996	0.304	0.1559			0.304	0.0543526	0.304	0.237552
				0.3042	1.49946	0.3042	1.2637			0.3042	0.963632	0.3042	0.510329			0.3042	0.217084	0.3042	0.156009			0.3042	0.0543881	0.3042	0.237627
				0.3044	1.49971	0.3044	1.26397			0.3044	0.964105	0.3044	0.510612			0.3044	0.217172	0.3044	0.156119			0.3044	0.0544236	0.3044	0.237702
				0.3046	1.49995	0.3046	1.26424			0.3046	0.964577	0.3046	0.510895			0.3046	0.217261	0.3046	0.156229			0.3046	0.0544591	0.3046	0.237778
				0.3048	1.5002	0.3048	1.26451			0.3048	0.96505	0.3048	0.511178			0.3048	0.217349	0.3048	0.156339			0.3048	0.0544947	0.3048	0.237853
				0.305	1.50044	0.305	1.26478			0.305	0.965522	0.305	0.511461			0.305	0.217437	0.305	0.156449			0.305	0.0545303	0.305	0.237929
				0.3052	1.50069	0.3052	1.26504			0.3052	0.965994	0.3052	0.511744			0.3052	0.217525	0.3052	0.156559			0.3052	0.0545659	0.3052	0.238004
				0.3054	1.50093	0.3054	1.26531			0.3054	0.966466	0.3054	0.512027			0.3054	0.217613	0.3054	0.15667			0.3054	0.0546015	0.3054	0.23808
				0.3056	1.50117	0.3056	1.26558			0.3056	0.966938	0.3056	0.51231			0.3056	0.217701	0.3056	0.15678			0.3056	0.0546371	0.3056	0.238155
				0.3058	1.50141	0.3058	1.26584			0.3058	0.967409	0.3058	0.512593			0.3058	0.21779	0.3058	0.15689			0.3058	0.0546728	0.3058	0.238231
				0.306	1.50165	0.306	1.26611			0.306	0.967881	0.306	0.512876			0.306	0.217878	0.306	0.157			0.306	0.0547085	0.306	0.238306
				0.3062	1.50189	0.3062	1.26637			0.3062	0.968352	0.3062	0.513159			0.3062	0.217966	0.3062	0.157111			0.3062	0.0547442	0.3062	0.238382
				0.3064	1.50213	0.3064	1.26663			0.3064	0.968823	0.3064	0.513442			0.3064	0.218054	0.3064	0.157221			0.3064	0.0547799	0.3064	0.238457
				0.3066	1.50237	0.3066	1.2669			0.3066	0.969294	0.3066	0.513726			0.3066	0.218143	0.3066	0.157332			0.3066	0.0548156	0.3066	0.238533
				0.3068	1.50261	0.3068	1.26716			0.3068	0.969765	0.3068	0.514009			0.3068	0.218231	0.3068	0.157442			0.3068	0.0548514	0.3068	0.238608
				0.307	1.50284	0.307	1.26742			0.307	0.970235	0.307	0.514292			0.307	0.218319	0.307	0.157553			0.307	0.0548871	0.307	0.238684
				0.3072	1.50308	0.3072	1.26768			0.3072	0.970706	0.3072	0.514575			0.3072	0.218407	0.3072	0.157663			0.3072	0.0549229	0.3072	0.23876
				0.3074	1.50331	0.3074	1.26794			0.3074	0.971176	0.3074	0.514859			0.3074	0.218496	0.3074	0.157774			0.3074	0.0549587	0.3074	0.238835
				0.3076	1.50355	0.3076	1.2682			0.3076	0.971646	0.3076	0.515142			0.3076	0.218584	0.3076	0.157885			0.3076	0.0549945	0.3076	0.238911
				0.3078	1.50378	0.3078	1.26846			0.3078	0.972116	0.3078	0.515426			0.3078	0.218673	0.3078	0.157996			0.3078	0.0550304	0.3078	0.238986
				0.308	1.50401	0.308	1.26872			0.308	0.972586	0.308	0.515709			0.308	0.218761	0.308	0.158106			0.308	0.0550662	0.308	0.239062
				0.3082	1.50424	0.3082	1.26898			0.3082	0.973055	0.3082	0.515993			0.3082	0.218849	0.3082	0.158217			0.3082	0.0551021	0.3082	0.239138
				0.3084	1.50447	0.3084	1.26924			0.3084	0.973524	0.3084	0.516276			0.3084	0.218938	0.3084	0.158328			0.3084	0.055138	0.3084	0.239213
				0.3086	1.5047	0.3086	1.2695			0.3086	0.973994	0.3086	0.51656			0.3086	0.219026	0.3086	0.158439			0.3086	0.0551739	0.3086	0.239289
				0.3088	1.50493	0.3088	1.26976			0.3088	0.974463	0.3088	0.516843			0.3088	0.219115	0.3088	0.15855			0.3088	0.0552099	0.3088	0.239364
				0.309	1.50516	0.309	1.27002			0.309	0.974931	0.309	0.517127			0.309	0.219203	0.309	0.158661			0.309	0.0552458	0.309	0.23944
				0.3092	1.50538	0.3092	1.27027			0.3092	0.9754	0.3092	0.51741			0.3092	0.219292	0.3092	0.158773			0.3092	0.0552818	0.3092	0.239516
				0.3094	1.50561	0.3094	1.27053			0.3094	0.975868	0.3094	0.517694			0.3094	0.21938	0.3094	0.158884			0.3094	0.0553178	0.3094	0.239591
				0.3096	1.50583	0.3096	1.27078			0.3096	0.976337	0.3096	0.517978			0.3096	0.219469	0.3096	0.158995			0.3096	0.0553538	0.3096	0.239667
				0.3098	1.50606	0.3098	1.27104			0.3098	0.976805	0.3098	0.518262			0.3098	0.219557	0.3098	0.159106			0.3098	0.0553898	0.3098	0.239743
				0.31	1.50628	0.31	1.27129			0.31	0.977273	0.31	0.518545			0.31	0.219646	0.31	0.159218			0.31	0.0554259	0.31	0.239818
				0.3102	1.5065	0.3102	1.27155			0.3102	0.97774	0.3102	0.518829			0.3102	0.219734	0.3102	0.159329			0.3102	0.0554619	0.3102	0.239894
				0.3104	1.50673	0.3104	1.2718			0.3104	0.978208	0.3104	0.519113			0.3104	0.219823	0.3104	0.159441			0.3104	0.055498	0.3104	0.23997
				0.3106	1.50695	0.3106	1.27205			0.3106	0.978675	0.3106	0.519397			0.3106	0.219912	0.3106	0.159552			0.3106	0.0555341	0.3106	0.240045
				0.3108	1.50717	0.3108	1.27231			0.3108	0.979142	0.3108	0.519681			0.3108	0.22	0.3108	0.159664			0.3108	0.0555702	0.3108	0.240121
				0.311	1.50738	0.311	1.27256			0.311	0.979609	0.311	0.519965			0.311	0.220089	0.311	0.159776			0.311	0.0556064	0.311	0.240197
				0.3112	1.5076	0.3112	1.27281			0.3112	0.980076	0.3112	0.520249			0.3112	0.220178	0.3112	0.159887			0.3112	0.0556425	0.3112	0.240273
				0.3114	1.50782	0.3114	1.27306			0.3114	0.980543	0.3114	0.520533			0.3114	0.220266	0.3114	0.159999			0.3114	0.0556787	0.3114	0.240348
				0.3116	1.50804	0.3116	1.27331			0.3116	0.981009	0.3116	0.520817			0.3116	0.220355	0.3116	0.160111			0.3116	0.0557149	0.3116	0.240424
				0.3118	1.50825	0.3118	1.27356			0.3118	0.981475	0.3118	0.521101			0.3118	0.220444	0.3118	0.160223			0.3118	0.0557511	0.3118	0.2405
				0.312	1.50847	0.312	1.27381			0.312	0.981941	0.312	0.521385			0.312	0.220533	0.312	0.160335			0.312	0.0557873	0.312	0.240576
				0.3122	1.50868	0.3122	1.27406			0.3122	0.982407	0.3122	0.521669			0.3122	0.220621	0.3122	0.160447			0.3122	0.0558236	0.3122	0.240651
				0.3124	1.50889	0.3124	1.27431			0.3124	0.982873	0.3124	0.521953			0.3124	0.22071	0.3124	0.160559			0.3124	0.0558598	0.3124	0.240727
				0.3126	1.50911	0.3126	1.27455			0.3126	0.983338	0.3126	0.522237			0.3126	0.220799	0.3126	0.160671			0.3126	0.0558961	0.3126	0.240803
				0.3128	1.50932	0.3128	1.2748			0.3128	0.983803	0.3128	0.522522			0.3128	0.220888	0.3128	0.160783			0.3128	0.0559324	0.3128	0.240879
				0.313	1.50953	0.313	1.27505			0.313	0.984269	0.313	0.522806			0.313	0.220976	0.313	0.160895			0.313	0.0559687	0.313	0.240954
				0.3132	1.50974	0.3132	1.27529			0.3132	0.984733	0.3132	0.52309			0.3132	0.221065	0.3132	0.161007			0.3132	0.0560051	0.3132	0.24103
				0.3134	1.50995	0.3134	1.27554			0.3134	0.985198	0.3134	0.523374			0.3134	0.221154	0.3134	0.16112			0.3134	0.0560414	0.3134	0.241106
				0.3136	1.51015	0.3136	1.27579			0.3136	0.985663	0.3136	0.523659			0.3136	0.221243	0.3136	0.161232			0.3136	0.0560778	0.3136	0.241182
				0.3138	1.51036	0.3138	1.27603			0.3138	0.986127	0.3138	0.523943			0.3138	0.221332	0.3138	0.161344			0.3138	0.0561142	0.3138	0.241258
				0.314	1.51057	0.314	1.27627			0.314	0.986591	0.314	0.524228			0.314	0.221421	0.314	0.161457			0.314	0.0561506	0.314	0.241334
				0.3142	1.51077	0.3142	1.27652			0.3142	0.987055	0.3142	0.524512			0.3142	0.22151	0.3142	0.161569			0.3142	0.0561871	0.3142	0.241409
				0.3144	1.51098	0.3144	1.27676			0.3144	0.987519	0.3144	0.524796			0.3144	0.221599	0.3144	0.161682			0.3144	0.0562235	0.3144	0.241485
				0.3146	1.51118	0.3146	1.277			0.3146	0.987982	0.3146	0.525081			0.3146	0.221688	0.3146	0.161794			0.3146	0.05626	0.3146	0.241561
				0.3148	1.51138	0.3148	1.27725			0.3148	0.988446	0.3148	0.525365			0.3148	0.221777	0.3148	0.161907			0.3148	0.0562965	0.3148	0.241637
				0.315	1.51158	0.315	1.27749			0.315	0.988909	0.315	0.52565			0.315	0.221866	0.315	0.16202			0.315	0.056333	0.315	0.241713
				0.3152	1.51178	0.3152	1.27773			0.3152	0.989372	0.3152	0.525935			0.3152	0.221955	0.3152	0.162133			0.3152	0.0563695	0.3152	0.241789
				0.3154	1.51198	0.3154	1.27797			0.3154	0.989835	0.3154	0.526219			0.3154	0.222044	0.3154	0.162245			0.3154	0.0564061	0.3154	0.241865
				0.3156	1.51218	0.3156	1.27821			0.3156	0.990297	0.3156	0.526504			0.3156	0.222133	0.3156	0.162358			0.3156	0.0564426	0.3156	0.241941
				0.3158	1.51238	0.3158	1.27845			0.3158	0.99076	0.3158	0.526788			0.3158	0.222222	0.3158	0.162471			0.3158	0.0564792	0.3158	0.242016
				0.316	1.51258	0.316	1.27869			0.316	0.991222	0.316	0.527073			0.316	0.222311	0.316	0.162584			0.316	0.0565158	0.316	0.242092
				0.3162	1.51277	0.3162	1.27893			0.3162	0.991684	0.3162	0.527358			0.3162	0.2224	0.3162	0.162697			0.3162	0.0565524	0.3162	0.242168
				0.3164	1.51297	0.3164	1.27916			0.3164	0.992146	0.3164	0.527643			0.3164	0.222489	0.3164	0.16281			0.3164	0.0565891	0.3164	0.242244
				0.3166	1.51316	0.3166	1.2794			0.3166	0.992607	0.3166	0.527927			0.3166	0.222578	0.3166	0.162924			0.3166	0.0566257	0.3166	0.24232
				0.3168	1.51336	0.3168	1.27964			0.3168	0.993069	0.3168	0.528212			0.3168	0.222667	0.3168	0.163037			0.3168	0.0566624	0.3168	0.242396
				0.317	1.51355	0.317	1.27987			0.317	0.99353	0.317	0.528497			0.317	0.222757	0.317	0.16315			0.317	0.0566991	0.317	0.242472
				0.3172	1.51374	0.3172	1.28011			0.3172	0.993991	0.3172	0.528782			0.3172	0.222846	0.3172	0.163263			0.3172	0.0567358	0.3172	0.242548
				0.3174	1.51394	0.3174	1.28035			0.3174	0.994452	0.3174	0.529067			0.3174	0.222935	0.3174	0.163377			0.3174	0.0567725	0.3174	0.242624
				0.3176	1.51413	0.3176	1.28058			0.3176	0.994912	0.3176	0.529352			0.3176	0.223024	0.3176	0.16349			0.3176	0.0568093	0.3176	0.2427
				0.3178	1.51432	0.3178	1.28081			0.3178	0.995373	0.3178	0.529637			0.3178	0.223113	0.3178	0.163604			0.3178	0.0568461	0.3178	0.242776
				0.318	1.5145	0.318	1.28105			0.318	0.995833	0.318	0.529922			0.318	0.223203	0.318	0.163717			0.318	0.0568829	0.318	0.242852
				0.3182	1.51469	0.3182	1.28128			0.3182	0.996293	0.3182	0.530207			0.3182	0.223292	0.3182	0.163831			0.3182	0.0569197	0.3182	0.242928
				0.3184	1.51488	0.3184	1.28151			0.3184	0.996753	0.3184	0.530492			0.3184	0.223381	0.3184	0.163944			0.3184	0.0569565	0.3184	0.243004
				0.3186	1.51506	0.3186	1.28175			0.3186	0.997212	0.3186	0.530777			0.3186	0.223471	0.3186	0.164058			0.3186	0.0569933	0.3186	0.24308
				0.3188	1.51525	0.3188	1.28198			0.3188	0.997672	0.3188	0.531062			0.3188	0.22356	0.3188	0.164172			0.3188	0.0570302	0.3188	0.243156
				0.319	1.51543	0.319	1.28221			0.319	0.998131	0.319	0.531347			0.319	0.223649	0.319	0.164285			0.319	0.0570671	0.319	0.243232
				0.3192	1.51562	0.3192	1.28244			0.3192	0.99859	0.3192	0.531632			0.3192	0.223739	0.3192	0.164399			0.3192	0.057104	0.3192	0.243308
				0.3194	1.5158	0.3194	1.28267			0.3194	0.999048	0.3194	0.531917			0.3194	0.223828	0.3194	0.164513			0.3194	0.0571409	0.3194	0.243384
				0.3196	1.51598	0.3196	1.2829			0.3196	0.999507	0.3196	0.532202			0.3196	0.223917	0.3196	0.164627			0.3196	0.0571778	0.3196	0.24346
				0.3198	1.51616	0.3198	1.28313			0.3198	0.999965	0.3198	0.532487			0.3198	0.224007	0.3198	0.164741			0.3198	0.0572148	0.3198	0.243536
				0.32	1.51634	0.32	1.28336			0.32	1.00042	0.32	0.532773			0.32	0.224096	0.32	0.164855			0.32	0.0572518	0.32	0.243612
				0.3202	1.51652	0.3202	1.28358			0.3202	1.00088	0.3202	0.533058			0.3202	0.224186	0.3202	0.164969			0.3202	0.0572888	0.3202	0.243689
				0.3204	1.5167	0.3204	1.28381			0.3204	1.00134	0.3204	0.533343			0.3204	0.224275	0.3204	0.165084			0.3204	0.0573258	0.3204	0.243765
				0.3206	1.51688	0.3206	1.28404			0.3206	1.0018	0.3206	0.533629			0.3206	0.224365	0.3206	0.165198			0.3206	0.0573628	0.3206	0.243841
				0.3208	1.51705	0.3208	1.28426			0.3208	1.00225	0.3208	0.533914			0.3208	0.224454	0.3208	0.165312			0.3208	0.0573999	0.3208	0.243917
				0.321	1.51723	0.321	1.28449			0.321	1.00271	0.321	0.534199			0.321	0.224544	0.321	0.165426			0.321	0.0574369	0.321	0.243993
				0.3212	1.5174	0.3212	1.28472			0.3212	1.00317	0.3212	0.534485			0.3212	0.224633	0.3212	0.165541			0.3212	0.057474	0.3212	0.244069
				0.3214	1.51758	0.3214	1.28494			0.3214	1.00362	0.3214	0.53477			0.3214	0.224723	0.3214	0.165655			0.3214	0.0575111	0.3214	0.244145
				0.3216	1.51775	0.3216	1.28516			0.3216	1.00408	0.3216	0.535055			0.3216	0.224812	0.3216	0.16577			0.3216	0.0575483	0.3216	0.244221
				0.3218	1.51792	0.3218	1.28539			0.3218	1.00454	0.3218	0.535341			0.3218	0.224902	0.3218	0.165884			0.3218	0.0575854	0.3218	0.244297
				0.322	1.51809	0.322	1.28561			0.322	1.00499	0.322	0.535626			0.322	0.224991	0.322	0.165999			0.322	0.0576226	0.322	0.244374
				0.3222	1.51826	0.3222	1.28583			0.3222	1.00545	0.3222	0.535912			0.3222	0.225081	0.3222	0.166113			0.3222	0.0576598	0.3222	0.24445
				0.3224	1.51843	0.3224	1.28606			0.3224	1.00591	0.3224	0.536197			0.3224	0.225171	0.3224	0.166228			0.3224	0.057697	0.3224	0.244526
				0.3226	1.5186	0.3226	1.28628			0.3226	1.00636	0.3226	0.536483			0.3226	0.22526	0.3226	0.166343			0.3226	0.0577342	0.3226	0.244602
				0.3228	1.51877	0.3228	1.2865			0.3228	1.00682	0.3228	0.536769			0.3228	0.22535	0.3228	0.166458			0.3228	0.0577714	0.3228	0.244678
				0.323	1.51893	0.323	1.28672			0.323	1.00727	0.323	0.537054			0.323	0.22544	0.323	0.166573			0.323	0.0578087	0.323	0.244754
				0.3232	1.5191	0.3232	1.28694			0.3232	1.00773	0.3232	0.53734			0.3232	0.225529	0.3232	0.166688			0.3232	0.057846	0.3232	0.244831
				0.3234	1.51927	0.3234	1.28716			0.3234	1.00818	0.3234	0.537625			0.3234	0.225619	0.3234	0.166802			0.3234	0.0578833	0.3234	0.244907
				0.3236	1.51943	0.3236	1.28738			0.3236	1.00863	0.3236	0.537911			0.3236	0.225709	0.3236	0.166918			0.3236	0.0579206	0.3236	0.244983
				0.3238	1.51959	0.3238	1.2876			0.3238	1.00909	0.3238	0.538197			0.3238	0.225798	0.3238	0.167033			0.3238	0.0579579	0.3238	0.245059
				0.324	1.51976	0.324	1.28781			0.324	1.00954	0.324	0.538483			0.324	0.225888	0.324	0.167148			0.324	0.0579953	0.324	0.245136
				0.3242	1.51992	0.3242	1.28803			0.3242	1.01	0.3242	0.538768			0.3242	0.225978	0.3242	0.167263			0.3242	0.0580326	0.3242	0.245212
				0.3244	1.52008	0.3244	1.28825			0.3244	1.01045	0.3244	0.539054			0.3244	0.226068	0.3244	0.167378			0.3244	0.05807	0.3244	0.245288
				0.3246	1.52024	0.3246	1.28846			0.3246	1.0109	0.3246	0.53934			0.3246	0.226158	0.3246	0.167493			0.3246	0.0581074	0.3246	0.245364
				0.3248	1.5204	0.3248	1.28868			0.3248	1.01136	0.3248	0.539626			0.3248	0.226247	0.3248	0.167609			0.3248	0.0581449	0.3248	0.245441
				0.325	1.52055	0.325	1.28889			0.325	1.01181	0.325	0.539912			0.325	0.226337	0.325	0.167724			0.325	0.0581823	0.325	0.245517
				0.3252	1.52071	0.3252	1.28911			0.3252	1.01226	0.3252	0.540197			0.3252	0.226427	0.3252	0.16784			0.3252	0.0582198	0.3252	0.245593
				0.3254	1.52087	0.3254	1.28932			0.3254	1.01271	0.3254	0.540483			0.3254	0.226517	0.3254	0.167955			0.3254	0.0582573	0.3254	0.245669
				0.3256	1.52102	0.3256	1.28954			0.3256	1.01317	0.3256	0.540769			0.3256	0.226607	0.3256	0.168071			0.3256	0.0582948	0.3256	0.245746
				0.3258	1.52118	0.3258	1.28975			0.3258	1.01362	0.3258	0.541055			0.3258	0.226697	0.3258	0.168186			0.3258	0.0583323	0.3258	0.245822
				0.326	1.52133	0.326	1.28996			0.326	1.01407	0.326	0.541341			0.326	0.226787	0.326	0.168302			0.326	0.0583698	0.326	0.245898
				0.3262	1.52148	0.3262	1.29017			0.3262	1.01452	0.3262	0.541627			0.3262	0.226877	0.3262	0.168418			0.3262	0.0584074	0.3262	0.245975
				0.3264	1.52163	0.3264	1.29038			0.3264	1.01497	0.3264	0.541913			0.3264	0.226967	0.3264	0.168533			0.3264	0.058445	0.3264	0.246051
				0.3266	1.52178	0.3266	1.2906			0.3266	1.01542	0.3266	0.542199			0.3266	0.227057	0.3266	0.168649			0.3266	0.0584826	0.3266	0.246127
				0.3268	1.52193	0.3268	1.29081			0.3268	1.01587	0.3268	0.542485			0.3268	0.227147	0.3268	0.168765			0.3268	0.0585202	0.3268	0.246204
				0.327	1.52208	0.327	1.29101			0.327	1.01633	0.327	0.542771			0.327	0.227237	0.327	0.168881			0.327	0.0585578	0.327	0.24628
				0.3272	1.52223	0.3272	1.29122			0.3272	1.01678	0.3272	0.543057			0.3272	0.227327	0.3272	0.168997			0.3272	0.0585955	0.3272	0.246356
				0.3274	1.52238	0.3274	1.29143			0.3274	1.01723	0.3274	0.543343			0.3274	0.227417	0.3274	0.169113			0.3274	0.0586332	0.3274	0.246433
				0.3276	1.52253	0.3276	1.29164			0.3276	1.01768	0.3276	0.54363			0.3276	0.227507	0.3276	0.169229			0.3276	0.0586709	0.3276	0.246509
				0.3278	1.52267	0.3278	1.29185			0.3278	1.01813	0.3278	0.543916			0.3278	0.227597	0.3278	0.169345			0.3278	0.0587086	0.3278	0.246585
				0.328	1.52282	0.328	1.29206			0.328	1.01858	0.328	0.544202			0.328	0.227687	0.328	0.169462			0.328	0.0587463	0.328	0.246662
				0.3282	1.52296	0.3282	1.29226			0.3282	1.01902	0.3282	0.544488			0.3282	0.227777	0.3282	0.169578			0.3282	0.0587841	0.3282	0.246738
				0.3284	1.5231	0.3284	1.29247			0.3284	1.01947	0.3284	0.544774			0.3284	0.227867	0.3284	0.169694			0.3284	0.0588218	0.3284	0.246814
				0.3286	1.52324	0.3286	1.29267			0.3286	1.01992	0.3286	0.545061			0.3286	0.227957	0.3286	0.169811			0.3286	0.0588596	0.3286	0.246891
				0.3288	1.52339	0.3288	1.29288			0.3288	1.02037	0.3288	0.545347			0.3288	0.228047	0.3288	0.169927			0.3288	0.0588974	0.3288	0.246967
				0.329	1.52353	0.329	1.29308			0.329	1.02082	0.329	0.545633			0.329	0.228138	0.329	0.170043			0.329	0.0589353	0.329	0.247044
				0.3292	1.52366	0.3292	1.29329			0.3292	1.02127	0.3292	0.545919			0.3292	0.228228	0.3292	0.17016			0.3292	0.0589731	0.3292	0.24712
				0.3294	1.5238	0.3294	1.29349			0.3294	1.02172	0.3294	0.546206			0.3294	0.228318	0.3294	0.170277			0.3294	0.059011	0.3294	0.247197
				0.3296	1.52394	0.3296	1.29369			0.3296	1.02216	0.3296	0.546492			0.3296	0.228408	0.3296	0.170393			0.3296	0.0590489	0.3296	0.247273
				0.3298	1.52408	0.3298	1.29389			0.3298	1.02261	0.3298	0.546778			0.3298	0.228498	0.3298	0.17051			0.3298	0.0590868	0.3298	0.247349
				0.33	1.52421	0.33	1.2941			0.33	1.02306	0.33	0.547065			0.33	0.228589	0.33	0.170627			0.33	0.0591247	0.33	0.247426
				0.3302	1.52435	0.3302	1.2943			0.3302	1.0235	0.3302	0.547351			0.3302	0.228679	0.3302	0.170743			0.3302	0.0591626	0.3302	0.247502
				0.3304	1.52448	0.3304	1.2945			0.3304	1.02395	0.3304	0.547638			0.3304	0.228769	0.3304	0.17086			0.3304	0.0592006	0.3304	0.247579
				0.3306	1.52462	0.3306	1.2947			0.3306	1.0244	0.3306	0.547924			0.3306	0.22886	0.3306	0.170977			0.3306	0.0592386	0.3306	0.247655
				0.3308	1.52475	0.3308	1.2949			0.3308	1.02484	0.3308	0.54821			0.3308	0.22895	0.3308	0.171094			0.3308	0.0592766	0.3308	0.247732
				0.331	1.52488	0.331	1.2951			0.331	1.02529	0.331	0.548497			0.331	0.22904	0.331	0.171211			0.331	0.0593146	0.331	0.247808
				0.3312	1.52501	0.3312	1.29529			0.3312	1.02574	0.3312	0.548783			0.3312	0.229131	0.3312	0.171328			0.3312	0.0593526	0.3312	0.247885
				0.3314	1.52514	0.3314	1.29549			0.3314	1.02618	0.3314	0.54907			0.3314	0.229221	0.3314	0.171445			0.3314	0.0593907	0.3314	0.247961
				0.3316	1.52527	0.3316	1.29569			0.3316	1.02663	0.3316	0.549356			0.3316	0.229311	0.3316	0.171562			0.3316	0.0594288	0.3316	0.248038
				0.3318	1.52539	0.3318	1.29589			0.3318	1.02707	0.3318	0.549643			0.3318	0.229402	0.3318	0.17168			0.3318	0.0594669	0.3318	0.248114
				0.332	1.52552	0.332	1.29608			0.332	1.02752	0.332	0.54993			0.332	0.229492	0.332	0.171797			0.332	0.059505	0.332	0.248191
				0.3322	1.52565	0.3322	1.29628			0.3322	1.02796	0.3322	0.550216			0.3322	0.229583	0.3322	0.171914			0.3322	0.0595431	0.3322	0.248267
				0.3324	1.52577	0.3324	1.29647			0.3324	1.02841	0.3324	0.550503			0.3324	0.229673	0.3324	0.172032			0.3324	0.0595812	0.3324	0.248344
				0.3326	1.5259	0.3326	1.29667			0.3326	1.02885	0.3326	0.550789			0.3326	0.229763	0.3326	0.172149			0.3326	0.0596194	0.3326	0.24842
				0.3328	1.52602	0.3328	1.29686			0.3328	1.02929	0.3328	0.551076			0.3328	0.229854	0.3328	0.172267			0.3328	0.0596576	0.3328	0.248497
				0.333	1.52614	0.333	1.29705			0.333	1.02974	0.333	0.551363			0.333	0.229944	0.333	0.172384			0.333	0.0596958	0.333	0.248574
				0.3332	1.52626	0.3332	1.29725			0.3332	1.03018	0.3332	0.551649			0.3332	0.230035	0.3332	0.172502			0.3332	0.059734	0.3332	0.24865
				0.3334	1.52638	0.3334	1.29744			0.3334	1.03063	0.3334	0.551936			0.3334	0.230126	0.3334	0.172619			0.3334	0.0597723	0.3334	0.248727
				0.3336	1.5265	0.3336	1.29763			0.3336	1.03107	0.3336	0.552223			0.3336	0.230216	0.3336	0.172737			0.3336	0.0598106	0.3336	0.248803
				0.3338	1.52662	0.3338	1.29782			0.3338	1.03151	0.3338	0.55251			0.3338	0.230307	0.3338	0.172855			0.3338	0.0598489	0.3338	0.24888
				0.334	1.52674	0.334	1.29801			0.334	1.03195	0.334	0.552796			0.334	0.230397	0.334	0.172973			0.334	0.0598872	0.334	0.248956
				0.3342	1.52686	0.3342	1.2982			0.3342	1.0324	0.3342	0.553083			0.3342	0.230488	0.3342	0.173091			0.3342	0.0599255	0.3342	0.249033
				0.3344	1.52697	0.3344	1.29839			0.3344	1.03284	0.3344	0.55337			0.3344	0.230578	0.3344	0.173209			0.3344	0.0599638	0.3344	0.24911
				0.3346	1.52709	0.3346	1.29858			0.3346	1.03328	0.3346	0.553657			0.3346	0.230669	0.3346	0.173327			0.3346	0.0600022	0.3346	0.249186
				0.3348	1.5272	0.3348	1.29877			0.3348	1.03372	0.3348	0.553943			0.3348	0.23076	0.3348	0.173445			0.3348	0.0600406	0.3348	0.249263
				0.335	1.52732	0.335	1.29896			0.335	1.03416	0.335	0.55423			0.335	0.23085	0.335	0.173563			0.335	0.060079	0.335	0.24934
				0.3352	1.52743	0.3352	1.29914			0.3352	1.0346	0.3352	0.554517			0.3352	0.230941	0.3352	0.173681			0.3352	0.0601174	0.3352	0.249416
				0.3354	1.52754	0.3354	1.29933			0.3354	1.03504	0.3354	0.554804			0.3354	0.231032	0.3354	0.173799			0.3354	0.0601558	0.3354	0.249493
				0.3356	1.52765	0.3356	1.29952			0.3356	1.03549	0.3356	0.555091			0.3356	0.231122	0.3356	0.173917			0.3356	0.0601943	0.3356	0.24957
				0.3358	1.52776	0.3358	1.2997			0.3358	1.03593	0.3358	0.555378			0.3358	0.231213	0.3358	0.174035			0.3358	0.0602328	0.3358	0.249646
				0.336	1.52787	0.336	1.29989			0.336	1.03637	0.336	0.555665			0.336	0.231304	0.336	0.174154			0.336	0.0602713	0.336	0.249723
				0.3362	1.52798	0.3362	1.30007			0.3362	1.03681	0.3362	0.555952			0.3362	0.231395	0.3362	0.174272			0.3362	0.0603098	0.3362	0.2498
				0.3364	1.52809	0.3364	1.30026			0.3364	1.03725	0.3364	0.556239			0.3364	0.231485	0.3364	0.174391			0.3364	0.0603483	0.3364	0.249876
				0.3366	1.52819	0.3366	1.30044			0.3366	1.03768	0.3366	0.556526			0.3366	0.231576	0.3366	0.174509			0.3366	0.0603869	0.3366	0.249953
				0.3368	1.5283	0.3368	1.30062			0.3368	1.03812	0.3368	0.556812			0.3368	0.231667	0.3368	0.174628			0.3368	0.0604254	0.3368	0.25003
				0.337	1.5284	0.337	1.30081			0.337	1.03856	0.337	0.557099			0.337	0.231758	0.337	0.174746			0.337	0.060464	0.337	0.250106
				0.3372	1.52851	0.3372	1.30099			0.3372	1.039	0.3372	0.557386			0.3372	0.231849	0.3372	0.174865			0.3372	0.0605027	0.3372	0.250183
				0.3374	1.52861	0.3374	1.30117			0.3374	1.03944	0.3374	0.557674			0.3374	0.23194	0.3374	0.174984			0.3374	0.0605413	0.3374	0.25026
				0.3376	1.52871	0.3376	1.30135			0.3376	1.03988	0.3376	0.557961			0.3376	0.23203	0.3376	0.175103			0.3376	0.0605799	0.3376	0.250336
				0.3378	1.52881	0.3378	1.30153			0.3378	1.04032	0.3378	0.558248			0.3378	0.232121	0.3378	0.175221			0.3378	0.0606186	0.3378	0.250413
				0.338	1.52891	0.338	1.30171			0.338	1.04075	0.338	0.558535			0.338	0.232212	0.338	0.17534			0.338	0.0606573	0.338	0.25049
				0.3382	1.52901	0.3382	1.30189			0.3382	1.04119	0.3382	0.558822			0.3382	0.232303	0.3382	0.175459			0.3382	0.060696	0.3382	0.250567
				0.3384	1.52911	0.3384	1.30207			0.3384	1.04163	0.3384	0.559109			0.3384	0.232394	0.3384	0.175578			0.3384	0.0607347	0.3384	0.250643
				0.3386	1.5292	0.3386	1.30225			0.3386	1.04206	0.3386	0.559396			0.3386	0.232485	0.3386	0.175697			0.3386	0.0607735	0.3386	0.25072
				0.3388	1.5293	0.3388	1.30242			0.3388	1.0425	0.3388	0.559683			0.3388	0.232576	0.3388	0.175816			0.3388	0.0608123	0.3388	0.250797
				0.339	1.5294	0.339	1.3026			0.339	1.04294	0.339	0.55997			0.339	0.232667	0.339	0.175936			0.339	0.060851	0.339	0.250874
				0.3392	1.52949	0.3392	1.30278			0.3392	1.04337	0.3392	0.560257			0.3392	0.232758	0.3392	0.176055			0.3392	0.0608898	0.3392	0.250951
				0.3394	1.52958	0.3394	1.30295			0.3394	1.04381	0.3394	0.560545			0.3394	0.232849	0.3394	0.176174			0.3394	0.0609287	0.3394	0.251027
				0.3396	1.52968	0.3396	1.30313			0.3396	1.04425	0.3396	0.560832			0.3396	0.23294	0.3396	0.176293			0.3396	0.0609675	0.3396	0.251104
				0.3398	1.52977	0.3398	1.3033			0.3398	1.04468	0.3398	0.561119			0.3398	0.233031	0.3398	0.176413			0.3398	0.0610064	0.3398	0.251181
				0.34	1.52986	0.34	1.30348			0.34	1.04512	0.34	0.561406			0.34	0.233122	0.34	0.176532			0.34	0.0610453	0.34	0.251258
				0.3402	1.52995	0.3402	1.30365			0.3402	1.04555	0.3402	0.561693			0.3402	0.233213	0.3402	0.176652			0.3402	0.0610842	0.3402	0.251335
				0.3404	1.53004	0.3404	1.30382			0.3404	1.04599	0.3404	0.561981			0.3404	0.233304	0.3404	0.176771			0.3404	0.0611231	0.3404	0.251411
				0.3406	1.53013	0.3406	1.30399			0.3406	1.04642	0.3406	0.562268			0.3406	0.233396	0.3406	0.176891			0.3406	0.061162	0.3406	0.251488
				0.3408	1.53022	0.3408	1.30417			0.3408	1.04685	0.3408	0.562555			0.3408	0.233487	0.3408	0.17701			0.3408	0.061201	0.3408	0.251565
				0.341	1.5303	0.341	1.30434			0.341	1.04729	0.341	0.562842			0.341	0.233578	0.341	0.17713			0.341	0.06124	0.341	0.251642
				0.3412	1.53039	0.3412	1.30451			0.3412	1.04772	0.3412	0.56313			0.3412	0.233669	0.3412	0.17725			0.3412	0.061279	0.3412	0.251719
				0.3414	1.53047	0.3414	1.30468			0.3414	1.04815	0.3414	0.563417			0.3414	0.23376	0.3414	0.17737			0.3414	0.061318	0.3414	0.251796
				0.3416	1.53056	0.3416	1.30485			0.3416	1.04859	0.3416	0.563704			0.3416	0.233851	0.3416	0.17749			0.3416	0.061357	0.3416	0.251872
				0.3418	1.53064	0.3418	1.30502			0.3418	1.04902	0.3418	0.563992			0.3418	0.233943	0.3418	0.177609			0.3418	0.0613961	0.3418	0.251949
				0.342	1.53072	0.342	1.30519			0.342	1.04945	0.342	0.564279			0.342	0.234034	0.342	0.177729			0.342	0.0614352	0.342	0.252026
				0.3422	1.5308	0.3422	1.30535			0.3422	1.04989	0.3422	0.564566			0.3422	0.234125	0.3422	0.177849			0.3422	0.0614743	0.3422	0.252103
				0.3424	1.53088	0.3424	1.30552			0.3424	1.05032	0.3424	0.564854			0.3424	0.234216	0.3424	0.177969			0.3424	0.0615134	0.3424	0.25218
				0.3426	1.53096	0.3426	1.30569			0.3426	1.05075	0.3426	0.565141			0.3426	0.234308	0.3426	0.17809			0.3426	0.0615525	0.3426	0.252257
				0.3428	1.53104	0.3428	1.30585			0.3428	1.05118	0.3428	0.565428			0.3428	0.234399	0.3428	0.17821			0.3428	0.0615917	0.3428	0.252334
				0.343	1.53112	0.343	1.30602			0.343	1.05161	0.343	0.565716			0.343	0.23449	0.343	0.17833			0.343	0.0616308	0.343	0.252411
				0.3432	1.53119	0.3432	1.30619			0.3432	1.05204	0.3432	0.566003			0.3432	0.234581	0.3432	0.17845			0.3432	0.06167	0.3432	0.252488
				0.3434	1.53127	0.3434	1.30635			0.3434	1.05247	0.3434	0.566291			0.3434	0.234673	0.3434	0.178571			0.3434	0.0617092	0.3434	0.252565
				0.3436	1.53134	0.3436	1.30651			0.3436	1.0529	0.3436	0.566578			0.3436	0.234764	0.3436	0.178691			0.3436	0.0617485	0.3436	0.252642
				0.3438	1.53142	0.3438	1.30668			0.3438	1.05333	0.3438	0.566866			0.3438	0.234856	0.3438	0.178811			0.3438	0.0617877	0.3438	0.252718
				0.344	1.53149	0.344	1.30684			0.344	1.05376	0.344	0.567153			0.344	0.234947	0.344	0.178932			0.344	0.061827	0.344	0.252795
				0.3442	1.53156	0.3442	1.307			0.3442	1.05419	0.3442	0.56744			0.3442	0.235038	0.3442	0.179053			0.3442	0.0618663	0.3442	0.252872
				0.3444	1.53163	0.3444	1.30716			0.3444	1.05462	0.3444	0.567728			0.3444	0.23513	0.3444	0.179173			0.3444	0.0619056	0.3444	0.252949
				0.3446	1.5317	0.3446	1.30733			0.3446	1.05505	0.3446	0.568015			0.3446	0.235221	0.3446	0.179294			0.3446	0.0619449	0.3446	0.253026
				0.3448	1.53177	0.3448	1.30749			0.3448	1.05548	0.3448	0.568303			0.3448	0.235313	0.3448	0.179414			0.3448	0.0619843	0.3448	0.253103
				0.345	1.53184	0.345	1.30765			0.345	1.05591	0.345	0.56859			0.345	0.235404	0.345	0.179535			0.345	0.0620236	0.345	0.25318
				0.3452	1.53191	0.3452	1.30781			0.3452	1.05634	0.3452	0.568878			0.3452	0.235496	0.3452	0.179656			0.3452	0.062063	0.3452	0.253257
				0.3454	1.53198	0.3454	1.30796			0.3454	1.05677	0.3454	0.569165			0.3454	0.235587	0.3454	0.179777			0.3454	0.0621024	0.3454	0.253334
				0.3456	1.53204	0.3456	1.30812			0.3456	1.0572	0.3456	0.569453			0.3456	0.235679	0.3456	0.179898			0.3456	0.0621419	0.3456	0.253411
				0.3458	1.53211	0.3458	1.30828			0.3458	1.05762	0.3458	0.56974			0.3458	0.23577	0.3458	0.180019			0.3458	0.0621813	0.3458	0.253488
				0.346	1.53217	0.346	1.30844			0.346	1.05805	0.346	0.570028			0.346	0.235862	0.346	0.18014			0.346	0.0622208	0.346	0.253565
				0.3462	1.53223	0.3462	1.3086			0.3462	1.05848	0.3462	0.570316			0.3462	0.235953	0.3462	0.180261			0.3462	0.0622603	0.3462	0.253642
				0.3464	1.5323	0.3464	1.30875			0.3464	1.0589	0.3464	0.570603			0.3464	0.236045	0.3464	0.180382			0.3464	0.0622998	0.3464	0.253719
				0.3466	1.53236	0.3466	1.30891			0.3466	1.05933	0.3466	0.570891			0.3466	0.236136	0.3466	0.180503			0.3466	0.0623393	0.3466	0.253796
				0.3468	1.53242	0.3468	1.30906			0.3468	1.05976	0.3468	0.571178			0.3468	0.236228	0.3468	0.180625			0.3468	0.0623788	0.3468	0.253873
				0.347	1.53248	0.347	1.30922			0.347	1.06018	0.347	0.571466			0.347	0.23632	0.347	0.180746			0.347	0.0624184	0.347	0.25395
				0.3472	1.53254	0.3472	1.30937			0.3472	1.06061	0.3472	0.571754			0.3472	0.236411	0.3472	0.180867			0.3472	0.062458	0.3472	0.254028
				0.3474	1.53259	0.3474	1.30952			0.3474	1.06103	0.3474	0.572041			0.3474	0.236503	0.3474	0.180989			0.3474	0.0624976	0.3474	0.254105
				0.3476	1.53265	0.3476	1.30968			0.3476	1.06146	0.3476	0.572329			0.3476	0.236595	0.3476	0.18111			0.3476	0.0625372	0.3476	0.254182
				0.3478	1.53271	0.3478	1.30983			0.3478	1.06188	0.3478	0.572616			0.3478	0.236686	0.3478	0.181232			0.3478	0.0625768	0.3478	0.254259
				0.348	1.53276	0.348	1.30998			0.348	1.06231	0.348	0.572904			0.348	0.236778	0.348	0.181353			0.348	0.0626165	0.348	0.254336
				0.3482	1.53281	0.3482	1.31013			0.3482	1.06273	0.3482	0.573192			0.3482	0.23687	0.3482	0.181475			0.3482	0.0626562	0.3482	0.254413
				0.3484	1.53287	0.3484	1.31028			0.3484	1.06316	0.3484	0.573479			0.3484	0.236961	0.3484	0.181597			0.3484	0.0626959	0.3484	0.25449
				0.3486	1.53292	0.3486	1.31043			0.3486	1.06358	0.3486	0.573767			0.3486	0.237053	0.3486	0.181718			0.3486	0.0627356	0.3486	0.254567
				0.3488	1.53297	0.3488	1.31058			0.3488	1.064	0.3488	0.574055			0.3488	0.237145	0.3488	0.18184			0.3488	0.0627753	0.3488	0.254644
				0.349	1.53302	0.349	1.31073			0.349	1.06443	0.349	0.574342			0.349	0.237237	0.349	0.181962			0.349	0.0628151	0.349	0.254721
				0.3492	1.53307	0.3492	1.31088			0.3492	1.06485	0.3492	0.57463			0.3492	0.237328	0.3492	0.182084			0.3492	0.0628549	0.3492	0.254798
				0.3494	1.53312	0.3494	1.31103			0.3494	1.06527	0.3494	0.574918			0.3494	0.23742	0.3494	0.182206			0.3494	0.0628947	0.3494	0.254876
				0.3496	1.53317	0.3496	1.31117			0.3496	1.0657	0.3496	0.575205			0.3496	0.237512	0.3496	0.182328			0.3496	0.0629345	0.3496	0.254953
				0.3498	1.53321	0.3498	1.31132			0.3498	1.06612	0.3498	0.575493			0.3498	0.237604	0.3498	0.18245			0.3498	0.0629743	0.3498	0.25503
				0.35	1.53326	0.35	1.31147			0.35	1.06654	0.35	0.575781			0.35	0.237696	0.35	0.182572			0.35	0.0630142	0.35	0.255107
				0.3502	1.5333	0.3502	1.31161			0.3502	1.06696	0.3502	0.576069			0.3502	0.237788	0.3502	0.182694			0.3502	0.0630541	0.3502	0.255184
				0.3504	1.53335	0.3504	1.31176			0.3504	1.06738	0.3504	0.576356			0.3504	0.23788	0.3504	0.182816			0.3504	0.063094	0.3504	0.255261
				0.3506	1.53339	0.3506	1.3119			0.3506	1.0678	0.3506	0.576644			0.3506	0.237971	0.3506	0.182939			0.3506	0.0631339	0.3506	0.255338
				0.3508	1.53343	0.3508	1.31204			0.3508	1.06822	0.3508	0.576932			0.3508	0.238063	0.3508	0.183061			0.3508	0.0631738	0.3508	0.255416
				0.351	1.53347	0.351	1.31219			0.351	1.06864	0.351	0.57722			0.351	0.238155	0.351	0.183183			0.351	0.0632138	0.351	0.255493
				0.3512	1.53351	0.3512	1.31233			0.3512	1.06906	0.3512	0.577507			0.3512	0.238247	0.3512	0.183306			0.3512	0.0632537	0.3512	0.25557
				0.3514	1.53355	0.3514	1.31247			0.3514	1.06948	0.3514	0.577795			0.3514	0.238339	0.3514	0.183428			0.3514	0.0632937	0.3514	0.255647
				0.3516	1.53359	0.3516	1.31261			0.3516	1.0699	0.3516	0.578083			0.3516	0.238431	0.3516	0.183551			0.3516	0.0633337	0.3516	0.255724
				0.3518	1.53363	0.3518	1.31275			0.3518	1.07032	0.3518	0.578371			0.3518	0.238523	0.3518	0.183673			0.3518	0.0633738	0.3518	0.255802
				0.352	1.53367	0.352	1.31289			0.352	1.07074	0.352	0.578658			0.352	0.238615	0.352	0.183796			0.352	0.0634138	0.352	0.255879
				0.3522	1.5337	0.3522	1.31303			0.3522	1.07116	0.3522	0.578946			0.3522	0.238707	0.3522	0.183919			0.3522	0.0634539	0.3522	0.255956
				0.3524	1.53374	0.3524	1.31317			0.3524	1.07158	0.3524	0.579234			0.3524	0.238799	0.3524	0.184041			0.3524	0.063494	0.3524	0.256033
				0.3526	1.53377	0.3526	1.31331			0.3526	1.072	0.3526	0.579522			0.3526	0.238891	0.3526	0.184164			0.3526	0.0635341	0.3526	0.256111
				0.3528	1.53381	0.3528	1.31345			0.3528	1.07242	0.3528	0.57981			0.3528	0.238983	0.3528	0.184287			0.3528	0.0635742	0.3528	0.256188
				0.353	1.53384	0.353	1.31359			0.353	1.07283	0.353	0.580097			0.353	0.239075	0.353	0.18441			0.353	0.0636144	0.353	0.256265
				0.3532	1.53387	0.3532	1.31372			0.3532	1.07325	0.3532	0.580385			0.3532	0.239168	0.3532	0.184533			0.3532	0.0636546	0.3532	0.256342
				0.3534	1.5339	0.3534	1.31386			0.3534	1.07367	0.3534	0.580673			0.3534	0.23926	0.3534	0.184656			0.3534	0.0636947	0.3534	0.25642
				0.3536	1.53393	0.3536	1.314			0.3536	1.07409	0.3536	0.580961			0.3536	0.239352	0.3536	0.184779			0.3536	0.063735	0.3536	0.256497
				0.3538	1.53396	0.3538	1.31413			0.3538	1.0745	0.3538	0.581249			0.3538	0.239444	0.3538	0.184902			0.3538	0.0637752	0.3538	0.256574
				0.354	1.53398	0.354	1.31427			0.354	1.07492	0.354	0.581536			0.354	0.239536	0.354	0.185025			0.354	0.0638154	0.354	0.256651
				0.3542	1.53401	0.3542	1.3144			0.3542	1.07533	0.3542	0.581824			0.3542	0.239628	0.3542	0.185149			0.3542	0.0638557	0.3542	0.256729
				0.3544	1.53404	0.3544	1.31453			0.3544	1.07575	0.3544	0.582112			0.3544	0.23972	0.3544	0.185272			0.3544	0.063896	0.3544	0.256806
				0.3546	1.53406	0.3546	1.31467			0.3546	1.07617	0.3546	0.5824			0.3546	0.239813	0.3546	0.185395			0.3546	0.0639363	0.3546	0.256883
				0.3548	1.53409	0.3548	1.3148			0.3548	1.07658	0.3548	0.582688			0.3548	0.239905	0.3548	0.185519			0.3548	0.0639766	0.3548	0.256961
				0.355	1.53411	0.355	1.31493			0.355	1.07699	0.355	0.582976			0.355	0.239997	0.355	0.185642			0.355	0.064017	0.355	0.257038
				0.3552	1.53413	0.3552	1.31506			0.3552	1.07741	0.3552	0.583263			0.3552	0.240089	0.3552	0.185766			0.3552	0.0640574	0.3552	0.257115
				0.3554	1.53415	0.3554	1.31519			0.3554	1.07782	0.3554	0.583551			0.3554	0.240182	0.3554	0.185889			0.3554	0.0640977	0.3554	0.257192
				0.3556	1.53417	0.3556	1.31532			0.3556	1.07824	0.3556	0.583839			0.3556	0.240274	0.3556	0.186013			0.3556	0.0641381	0.3556	0.25727
				0.3558	1.53419	0.3558	1.31545			0.3558	1.07865	0.3558	0.584127			0.3558	0.240366	0.3558	0.186136			0.3558	0.0641786	0.3558	0.257347
				0.356	1.53421	0.356	1.31558			0.356	1.07906	0.356	0.584415			0.356	0.240459	0.356	0.18626			0.356	0.064219	0.356	0.257425
				0.3562	1.53423	0.3562	1.31571			0.3562	1.07948	0.3562	0.584703			0.3562	0.240551	0.3562	0.186384			0.3562	0.0642595	0.3562	0.257502
				0.3564	1.53425	0.3564	1.31584			0.3564	1.07989	0.3564	0.584991			0.3564	0.240643	0.3564	0.186508			0.3564	0.0643	0.3564	0.257579
				0.3566	1.53426	0.3566	1.31596			0.3566	1.0803	0.3566	0.585278			0.3566	0.240736	0.3566	0.186632			0.3566	0.0643405	0.3566	0.257657
				0.3568	1.53428	0.3568	1.31609			0.3568	1.08072	0.3568	0.585566			0.3568	0.240828	0.3568	0.186755			0.3568	0.064381	0.3568	0.257734
				0.357	1.53429	0.357	1.31622			0.357	1.08113	0.357	0.585854			0.357	0.24092	0.357	0.186879			0.357	0.0644216	0.357	0.257811
				0.3572	1.5343	0.3572	1.31634			0.3572	1.08154	0.3572	0.586142			0.3572	0.241013	0.3572	0.187004			0.3572	0.0644621	0.3572	0.257889
				0.3574	1.53432	0.3574	1.31647			0.3574	1.08195	0.3574	0.58643			0.3574	0.241105	0.3574	0.187128			0.3574	0.0645027	0.3574	0.257966
				0.3576	1.53433	0.3576	1.31659			0.3576	1.08236	0.3576	0.586718			0.3576	0.241198	0.3576	0.187252			0.3576	0.0645433	0.3576	0.258043
				0.3578	1.53434	0.3578	1.31672			0.3578	1.08277	0.3578	0.587006			0.3578	0.24129	0.3578	0.187376			0.3578	0.0645839	0.3578	0.258121
				0.358	1.53435	0.358	1.31684			0.358	1.08318	0.358	0.587294			0.358	0.241383	0.358	0.1875			0.358	0.0646246	0.358	0.258198
				0.3582	1.53436	0.3582	1.31696			0.3582	1.08359	0.3582	0.587582			0.3582	0.241475	0.3582	0.187625			0.3582	0.0646652	0.3582	0.258276
				0.3584	1.53436	0.3584	1.31708			0.3584	1.084	0.3584	0.587869			0.3584	0.241568	0.3584	0.187749			0.3584	0.0647059	0.3584	0.258353
				0.3586	1.53437	0.3586	1.31721			0.3586	1.08441	0.3586	0.588157			0.3586	0.24166	0.3586	0.187873			0.3586	0.0647466	0.3586	0.258431
				0.3588	1.53438	0.3588	1.31733			0.3588	1.08482	0.3588	0.588445			0.3588	0.241753	0.3588	0.187998			0.3588	0.0647874	0.3588	0.258508
				0.359	1.53438	0.359	1.31745			0.359	1.08523	0.359	0.588733			0.359	0.241845	0.359	0.188122			0.359	0.0648281	0.359	0.258585
				0.3592	1.53439	0.3592	1.31757			0.3592	1.08564	0.3592	0.589021			0.3592	0.241938	0.3592	0.188247			0.3592	0.0648689	0.3592	0.258663
				0.3594	1.53439	0.3594	1.31769			0.3594	1.08605	0.3594	0.589309			0.3594	0.24203	0.3594	0.188371			0.3594	0.0649096	0.3594	0.25874
				0.3596	1.53439	0.3596	1.3178			0.3596	1.08645	0.3596	0.589597			0.3596	0.242123	0.3596	0.188496			0.3596	0.0649505	0.3596	0.258818
				0.3598	1.53439	0.3598	1.31792			0.3598	1.08686	0.3598	0.589885			0.3598	0.242216	0.3598	0.188621			0.3598	0.0649913	0.3598	0.258895
				0.36	1.53439	0.36	1.31804			0.36	1.08727	0.36	0.590172			0.36	0.242308	0.36	0.188746			0.36	0.0650321	0.36	0.258973
				0.3602	1.53439	0.3602	1.31816			0.3602	1.08768	0.3602	0.59046			0.3602	0.242401	0.3602	0.188871			0.3602	0.065073	0.3602	0.25905
				0.3604	1.53439	0.3604	1.31827			0.3604	1.08808	0.3604	0.590748			0.3604	0.242493	0.3604	0.188995			0.3604	0.0651139	0.3604	0.259128
				0.3606	1.53439	0.3606	1.31839			0.3606	1.08849	0.3606	0.591036			0.3606	0.242586	0.3606	0.18912			0.3606	0.0651548	0.3606	0.259205
				0.3608	1.53439	0.3608	1.3185			0.3608	1.0889	0.3608	0.591324			0.3608	0.242679	0.3608	0.189245			0.3608	0.0651957	0.3608	0.259283
				0.361	1.53438	0.361	1.31862			0.361	1.0893	0.361	0.591612			0.361	0.242771	0.361	0.18937			0.361	0.0652366	0.361	0.25936
				0.3612	1.53438	0.3612	1.31873			0.3612	1.08971	0.3612	0.5919			0.3612	0.242864	0.3612	0.189496			0.3612	0.0652776	0.3612	0.259438
				0.3614	1.53437	0.3614	1.31885			0.3614	1.09011	0.3614	0.592188			0.3614	0.242957	0.3614	0.189621			0.3614	0.0653186	0.3614	0.259515
				0.3616	1.53436	0.3616	1.31896			0.3616	1.09052	0.3616	0.592476			0.3616	0.24305	0.3616	0.189746			0.3616	0.0653596	0.3616	0.259593
				0.3618	1.53436	0.3618	1.31907			0.3618	1.09092	0.3618	0.592763			0.3618	0.243142	0.3618	0.189871			0.3618	0.0654006	0.3618	0.25967
				0.362	1.53435	0.362	1.31918			0.362	1.09133	0.362	0.593051			0.362	0.243235	0.362	0.189996			0.362	0.0654416	0.362	0.259748
				0.3622	1.53434	0.3622	1.31929			0.3622	1.09173	0.3622	0.593339			0.3622	0.243328	0.3622	0.190122			0.3622	0.0654827	0.3622	0.259825
				0.3624	1.53433	0.3624	1.3194			0.3624	1.09214	0.3624	0.593627			0.3624	0.243421	0.3624	0.190247			0.3624	0.0655238	0.3624	0.259903
				0.3626	1.53432	0.3626	1.31951			0.3626	1.09254	0.3626	0.593915			0.3626	0.243514	0.3626	0.190373			0.3626	0.0655649	0.3626	0.25998
				0.3628	1.5343	0.3628	1.31962			0.3628	1.09294	0.3628	0.594203			0.3628	0.243606	0.3628	0.190498			0.3628	0.065606	0.3628	0.260058
				0.363	1.53429	0.363	1.31973			0.363	1.09335	0.363	0.594491			0.363	0.243699	0.363	0.190624			0.363	0.0656472	0.363	0.260135
				0.3632	1.53428	0.3632	1.31984			0.3632	1.09375	0.3632	0.594779			0.3632	0.243792	0.3632	0.19075			0.3632	0.0656883	0.3632	0.260213
				0.3634	1.53426	0.3634	1.31995			0.3634	1.09415	0.3634	0.595066			0.3634	0.243885	0.3634	0.190875			0.3634	0.0657295	0.3634	0.260291
				0.3636	1.53425	0.3636	1.32005			0.3636	1.09455	0.3636	0.595354			0.3636	0.243978	0.3636	0.191001			0.3636	0.0657707	0.3636	0.260368
				0.3638	1.53423	0.3638	1.32016			0.3638	1.09495	0.3638	0.595642			0.3638	0.244071	0.3638	0.191127			0.3638	0.0658119	0.3638	0.260446
				0.364	1.53421	0.364	1.32027			0.364	1.09536	0.364	0.59593			0.364	0.244164	0.364	0.191253			0.364	0.0658532	0.364	0.260523
				0.3642	1.53419	0.3642	1.32037			0.3642	1.09576	0.3642	0.596218			0.3642	0.244257	0.3642	0.191379			0.3642	0.0658944	0.3642	0.260601
				0.3644	1.53417	0.3644	1.32048			0.3644	1.09616	0.3644	0.596506			0.3644	0.24435	0.3644	0.191505			0.3644	0.0659357	0.3644	0.260678
				0.3646	1.53415	0.3646	1.32058			0.3646	1.09656	0.3646	0.596794			0.3646	0.244443	0.3646	0.191631			0.3646	0.065977	0.3646	0.260756
				0.3648	1.53413	0.3648	1.32069			0.3648	1.09696	0.3648	0.597082			0.3648	0.244536	0.3648	0.191757			0.3648	0.0660183	0.3648	0.260834
				0.365	1.53411	0.365	1.32079			0.365	1.09736	0.365	0.597369			0.365	0.244629	0.365	0.191883			0.365	0.0660597	0.365	0.260911
				0.3652	1.53409	0.3652	1.32089			0.3652	1.09776	0.3652	0.597657			0.3652	0.244722	0.3652	0.192009			0.3652	0.066101	0.3652	0.260989
				0.3654	1.53406	0.3654	1.32099			0.3654	1.09816	0.3654	0.597945			0.3654	0.244815	0.3654	0.192135			0.3654	0.0661424	0.3654	0.261067
				0.3656	1.53404	0.3656	1.32109			0.3656	1.09856	0.3656	0.598233			0.3656	0.244908	0.3656	0.192261			0.3656	0.0661838	0.3656	0.261144
				0.3658	1.53401	0.3658	1.32119			0.3658	1.09895	0.3658	0.598521			0.3658	0.245001	0.3658	0.192388			0.3658	0.0662252	0.3658	0.261222
				0.366	1.53398	0.366	1.32129			0.366	1.09935	0.366	0.598809			0.366	0.245094	0.366	0.192514			0.366	0.0662667	0.366	0.2613
				0.3662	1.53396	0.3662	1.32139			0.3662	1.09975	0.3662	0.599096			0.3662	0.245187	0.3662	0.192641			0.3662	0.0663081	0.3662	0.261377
				0.3664	1.53393	0.3664	1.32149			0.3664	1.10015	0.3664	0.599384			0.3664	0.24528	0.3664	0.192767			0.3664	0.0663496	0.3664	0.261455
				0.3666	1.5339	0.3666	1.32159			0.3666	1.10055	0.3666	0.599672			0.3666	0.245373	0.3666	0.192894			0.3666	0.0663911	0.3666	0.261532
				0.3668	1.53387	0.3668	1.32169			0.3668	1.10094	0.3668	0.59996			0.3668	0.245466	0.3668	0.19302			0.3668	0.0664327	0.3668	0.26161
				0.367	1.53384	0.367	1.32179			0.367	1.10134	0.367	0.600248			0.367	0.245559	0.367	0.193147			0.367	0.0664742	0.367	0.261688
				0.3672	1.53381	0.3672	1.32188			0.3672	1.10174	0.3672	0.600535			0.3672	0.245652	0.3672	0.193274			0.3672	0.0665158	0.3672	0.261766
				0.3674	1.53377	0.3674	1.32198			0.3674	1.10213	0.3674	0.600823			0.3674	0.245746	0.3674	0.1934			0.3674	0.0665573	0.3674	0.261843
				0.3676	1.53374	0.3676	1.32207			0.3676	1.10253	0.3676	0.601111			0.3676	0.245839	0.3676	0.193527			0.3676	0.0665989	0.3676	0.261921
				0.3678	1.5337	0.3678	1.32217			0.3678	1.10292	0.3678	0.601399			0.3678	0.245932	0.3678	0.193654			0.3678	0.0666406	0.3678	0.261999
				0.368	1.53367	0.368	1.32226			0.368	1.10332	0.368	0.601687			0.368	0.246025	0.368	0.193781			0.368	0.0666822	0.368	0.262076
				0.3682	1.53363	0.3682	1.32236			0.3682	1.10371	0.3682	0.601974			0.3682	0.246118	0.3682	0.193908			0.3682	0.0667239	0.3682	0.262154
				0.3684	1.53359	0.3684	1.32245			0.3684	1.10411	0.3684	0.602262			0.3684	0.246212	0.3684	0.194035			0.3684	0.0667655	0.3684	0.262232
				0.3686	1.53355	0.3686	1.32254			0.3686	1.1045	0.3686	0.60255			0.3686	0.246305	0.3686	0.194162			0.3686	0.0668073	0.3686	0.262309
				0.3688	1.53351	0.3688	1.32264			0.3688	1.10489	0.3688	0.602838			0.3688	0.246398	0.3688	0.194289			0.3688	0.066849	0.3688	0.262387
				0.369	1.53347	0.369	1.32273			0.369	1.10529	0.369	0.603125			0.369	0.246491	0.369	0.194416			0.369	0.0668907	0.369	0.262465
				0.3692	1.53343	0.3692	1.32282			0.3692	1.10568	0.3692	0.603413			0.3692	0.246585	0.3692	0.194544			0.3692	0.0669325	0.3692	0.262543
				0.3694	1.53339	0.3694	1.32291			0.3694	1.10607	0.3694	0.603701			0.3694	0.246678	0.3694	0.194671			0.3694	0.0669743	0.3694	0.26262
				0.3696	1.53335	0.3696	1.323			0.3696	1.10647	0.3696	0.603989			0.3696	0.246771	0.3696	0.194798			0.3696	0.0670161	0.3696	0.262698
				0.3698	1.5333	0.3698	1.32309			0.3698	1.10686	0.3698	0.604276			0.3698	0.246865	0.3698	0.194926			0.3698	0.0670579	0.3698	0.262776
				0.37	1.53326	0.37	1.32318			0.37	1.10725	0.37	0.604564			0.37	0.246958	0.37	0.195053			0.37	0.0670997	0.37	0.262854
				0.3702	1.53321	0.3702	1.32326			0.3702	1.10764	0.3702	0.604852			0.3702	0.247052	0.3702	0.195181			0.3702	0.0671416	0.3702	0.262931
				0.3704	1.53317	0.3704	1.32335			0.3704	1.10803	0.3704	0.605139			0.3704	0.247145	0.3704	0.195308			0.3704	0.0671835	0.3704	0.263009
				0.3706	1.53312	0.3706	1.32344			0.3706	1.10842	0.3706	0.605427			0.3706	0.247238	0.3706	0.195436			0.3706	0.0672254	0.3706	0.263087
				0.3708	1.53307	0.3708	1.32352			0.3708	1.10882	0.3708	0.605715			0.3708	0.247332	0.3708	0.195564			0.3708	0.0672673	0.3708	0.263165
				0.371	1.53302	0.371	1.32361			0.371	1.10921	0.371	0.606003			0.371	0.247425	0.371	0.195691			0.371	0.0673092	0.371	0.263243
				0.3712	1.53297	0.3712	1.32369			0.3712	1.1096	0.3712	0.60629			0.3712	0.247519	0.3712	0.195819			0.3712	0.0673512	0.3712	0.26332
				0.3714	1.53292	0.3714	1.32378			0.3714	1.10999	0.3714	0.606578			0.3714	0.247612	0.3714	0.195947			0.3714	0.0673932	0.3714	0.263398
				0.3716	1.53287	0.3716	1.32386			0.3716	1.11037	0.3716	0.606866			0.3716	0.247706	0.3716	0.196075			0.3716	0.0674352	0.3716	0.263476
				0.3718	1.53281	0.3718	1.32395			0.3718	1.11076	0.3718	0.607153			0.3718	0.247799	0.3718	0.196203			0.3718	0.0674772	0.3718	0.263554
				0.372	1.53276	0.372	1.32403			0.372	1.11115	0.372	0.607441			0.372	0.247893	0.372	0.196331			0.372	0.0675193	0.372	0.263632
				0.3722	1.53271	0.3722	1.32411			0.3722	1.11154	0.3722	0.607729			0.3722	0.247986	0.3722	0.196459			0.3722	0.0675613	0.3722	0.263709
				0.3724	1.53265	0.3724	1.32419			0.3724	1.11193	0.3724	0.608016			0.3724	0.24808	0.3724	0.196587			0.3724	0.0676034	0.3724	0.263787
				0.3726	1.53259	0.3726	1.32427			0.3726	1.11232	0.3726	0.608304			0.3726	0.248173	0.3726	0.196715			0.3726	0.0676455	0.3726	0.263865
				0.3728	1.53254	0.3728	1.32435			0.3728	1.1127	0.3728	0.608591			0.3728	0.248267	0.3728	0.196843			0.3728	0.0676877	0.3728	0.263943
				0.373	1.53248	0.373	1.32443			0.373	1.11309	0.373	0.608879			0.373	0.24836	0.373	0.196971			0.373	0.0677298	0.373	0.264021
				0.3732	1.53242	0.3732	1.32451			0.3732	1.11348	0.3732	0.609167			0.3732	0.248454	0.3732	0.1971			0.3732	0.067772	0.3732	0.264099
				0.3734	1.53236	0.3734	1.32459			0.3734	1.11386	0.3734	0.609454			0.3734	0.248547	0.3734	0.197228			0.3734	0.0678141	0.3734	0.264177
				0.3736	1.5323	0.3736	1.32467			0.3736	1.11425	0.3736	0.609742			0.3736	0.248641	0.3736	0.197357			0.3736	0.0678564	0.3736	0.264254
				0.3738	1.53223	0.3738	1.32475			0.3738	1.11464	0.3738	0.610029			0.3738	0.248735	0.3738	0.197485			0.3738	0.0678986	0.3738	0.264332
				0.374	1.53217	0.374	1.32482			0.374	1.11502	0.374	0.610317			0.374	0.248828	0.374	0.197614			0.374	0.0679408	0.374	0.26441
				0.3742	1.53211	0.3742	1.3249			0.3742	1.11541	0.3742	0.610604			0.3742	0.248922	0.3742	0.197742			0.3742	0.0679831	0.3742	0.264488
				0.3744	1.53204	0.3744	1.32497			0.3744	1.11579	0.3744	0.610892			0.3744	0.249016	0.3744	0.197871			0.3744	0.0680254	0.3744	0.264566
				0.3746	1.53198	0.3746	1.32505			0.3746	1.11617	0.3746	0.611179			0.3746	0.249109	0.3746	0.197999			0.3746	0.0680677	0.3746	0.264644
				0.3748	1.53191	0.3748	1.32512			0.3748	1.11656	0.3748	0.611467			0.3748	0.249203	0.3748	0.198128			0.3748	0.06811	0.3748	0.264722
				0.375	1.53184	0.375	1.3252			0.375	1.11694	0.375	0.611754			0.375	0.249297	0.375	0.198257			0.375	0.0681524	0.375	0.2648
				0.3752	1.53177	0.3752	1.32527			0.3752	1.11733	0.3752	0.612042			0.3752	0.249391	0.3752	0.198386			0.3752	0.0681947	0.3752	0.264878
				0.3754	1.5317	0.3754	1.32534			0.3754	1.11771	0.3754	0.612329			0.3754	0.249484	0.3754	0.198515			0.3754	0.0682371	0.3754	0.264955
				0.3756	1.53163	0.3756	1.32542			0.3756	1.11809	0.3756	0.612617			0.3756	0.249578	0.3756	0.198644			0.3756	0.0682795	0.3756	0.265033
				0.3758	1.53156	0.3758	1.32549			0.3758	1.11847	0.3758	0.612904			0.3758	0.249672	0.3758	0.198773			0.3758	0.068322	0.3758	0.265111
				0.376	1.53149	0.376	1.32556			0.376	1.11886	0.376	0.613192			0.376	0.249766	0.376	0.198902			0.376	0.0683644	0.376	0.265189
				0.3762	1.53142	0.3762	1.32563			0.3762	1.11924	0.3762	0.613479			0.3762	0.249859	0.3762	0.199031			0.3762	0.0684069	0.3762	0.265267
				0.3764	1.53134	0.3764	1.3257			0.3764	1.11962	0.3764	0.613767			0.3764	0.249953	0.3764	0.19916			0.3764	0.0684494	0.3764	0.265345
				0.3766	1.53127	0.3766	1.32577			0.3766	1.12	0.3766	0.614054			0.3766	0.250047	0.3766	0.199289			0.3766	0.0684919	0.3766	0.265423
				0.3768	1.53119	0.3768	1.32584			0.3768	1.12038	0.3768	0.614342			0.3768	0.250141	0.3768	0.199419			0.3768	0.0685344	0.3768	0.265501
				0.377	1.53112	0.377	1.32591			0.377	1.12076	0.377	0.614629			0.377	0.250235	0.377	0.199548			0.377	0.068577	0.377	0.265579
				0.3772	1.53104	0.3772	1.32597			0.3772	1.12114	0.3772	0.614916			0.3772	0.250329	0.3772	0.199677			0.3772	0.0686195	0.3772	0.265657
				0.3774	1.53096	0.3774	1.32604			0.3774	1.12152	0.3774	0.615204			0.3774	0.250423	0.3774	0.199807			0.3774	0.0686621	0.3774	0.265735
				0.3776	1.53088	0.3776	1.32611			0.3776	1.1219	0.3776	0.615491			0.3776	0.250517	0.3776	0.199936			0.3776	0.0687047	0.3776	0.265813
				0.3778	1.5308	0.3778	1.32617			0.3778	1.12228	0.3778	0.615778			0.3778	0.25061	0.3778	0.200066			0.3778	0.0687474	0.3778	0.265891
				0.378	1.53072	0.378	1.32624			0.378	1.12266	0.378	0.616066			0.378	0.250704	0.378	0.200195			0.378	0.06879	0.378	0.265969
				0.3782	1.53064	0.3782	1.3263			0.3782	1.12304	0.3782	0.616353			0.3782	0.250798	0.3782	0.200325			0.3782	0.0688327	0.3782	0.266047
				0.3784	1.53056	0.3784	1.32637			0.3784	1.12341	0.3784	0.61664			0.3784	0.250892	0.3784	0.200455			0.3784	0.0688754	0.3784	0.266125
				0.3786	1.53047	0.3786	1.32643			0.3786	1.12379	0.3786	0.616928			0.3786	0.250986	0.3786	0.200584			0.3786	0.0689181	0.3786	0.266203
				0.3788	1.53039	0.3788	1.32649			0.3788	1.12417	0.3788	0.617215			0.3788	0.25108	0.3788	0.200714			0.3788	0.0689608	0.3788	0.266281
				0.379	1.5303	0.379	1.32655			0.379	1.12455	0.379	0.617502			0.379	0.251174	0.379	0.200844			0.379	0.0690036	0.379	0.266359
				0.3792	1.53022	0.3792	1.32662			0.3792	1.12492	0.3792	0.617789			0.3792	0.251268	0.3792	0.200974			0.3792	0.0690464	0.3792	0.266437
				0.3794	1.53013	0.3794	1.32668			0.3794	1.1253	0.3794	0.618077			0.3794	0.251362	0.3794	0.201104			0.3794	0.0690892	0.3794	0.266515
				0.3796	1.53004	0.3796	1.32674			0.3796	1.12568	0.3796	0.618364			0.3796	0.251456	0.3796	0.201234			0.3796	0.069132	0.3796	0.266593
				0.3798	1.52995	0.3798	1.3268			0.3798	1.12605	0.3798	0.618651			0.3798	0.25155	0.3798	0.201364			0.3798	0.0691748	0.3798	0.266671
				0.38	1.52986	0.38	1.32686			0.38	1.12643	0.38	0.618938			0.38	0.251644	0.38	0.201494			0.38	0.0692177	0.38	0.266749
				0.3802	1.52977	0.3802	1.32691			0.3802	1.1268	0.3802	0.619225			0.3802	0.251739	0.3802	0.201624			0.3802	0.0692605	0.3802	0.266827
				0.3804	1.52968	0.3804	1.32697			0.3804	1.12718	0.3804	0.619513			0.3804	0.251833	0.3804	0.201754			0.3804	0.0693034	0.3804	0.266905
				0.3806	1.52958	0.3806	1.32703			0.3806	1.12755	0.3806	0.6198			0.3806	0.251927	0.3806	0.201885			0.3806	0.0693463	0.3806	0.266983
				0.3808	1.52949	0.3808	1.32709			0.3808	1.12792	0.3808	0.620087			0.3808	0.252021	0.3808	0.202015			0.3808	0.0693893	0.3808	0.267061
				0.381	1.5294	0.381	1.32714			0.381	1.1283	0.381	0.620374			0.381	0.252115	0.381	0.202145			0.381	0.0694322	0.381	0.267139
				0.3812	1.5293	0.3812	1.3272			0.3812	1.12867	0.3812	0.620661			0.3812	0.252209	0.3812	0.202276			0.3812	0.0694752	0.3812	0.267217
				0.3814	1.5292	0.3814	1.32725			0.3814	1.12904	0.3814	0.620948			0.3814	0.252303	0.3814	0.202406			0.3814	0.0695182	0.3814	0.267295
				0.3816	1.52911	0.3816	1.32731			0.3816	1.12942	0.3816	0.621235			0.3816	0.252398	0.3816	0.202537			0.3816	0.0695612	0.3816	0.267374
				0.3818	1.52901	0.3818	1.32736			0.3818	1.12979	0.3818	0.621522			0.3818	0.252492	0.3818	0.202668			0.3818	0.0696043	0.3818	0.267452
				0.382	1.52891	0.382	1.32742			0.382	1.13016	0.382	0.62181			0.382	0.252586	0.382	0.202798			0.382	0.0696473	0.382	0.26753
				0.3822	1.52881	0.3822	1.32747			0.3822	1.13053	0.3822	0.622097			0.3822	0.25268	0.3822	0.202929			0.3822	0.0696904	0.3822	0.267608
				0.3824	1.52871	0.3824	1.32752			0.3824	1.1309	0.3824	0.622384			0.3824	0.252774	0.3824	0.20306			0.3824	0.0697335	0.3824	0.267686
				0.3826	1.52861	0.3826	1.32757			0.3826	1.13127	0.3826	0.622671			0.3826	0.252869	0.3826	0.20319			0.3826	0.0697766	0.3826	0.267764
				0.3828	1.52851	0.3828	1.32762			0.3828	1.13164	0.3828	0.622958			0.3828	0.252963	0.3828	0.203321			0.3828	0.0698198	0.3828	0.267842
				0.383	1.5284	0.383	1.32767			0.383	1.13201	0.383	0.623245			0.383	0.253057	0.383	0.203452			0.383	0.0698629	0.383	0.26792
				0.3832	1.5283	0.3832	1.32772			0.3832	1.13238	0.3832	0.623531			0.3832	0.253152	0.3832	0.203583			0.3832	0.0699061	0.3832	0.267998
				0.3834	1.52819	0.3834	1.32777			0.3834	1.13275	0.3834	0.623818			0.3834	0.253246	0.3834	0.203714			0.3834	0.0699493	0.3834	0.268077
				0.3836	1.52809	0.3836	1.32782			0.3836	1.13312	0.3836	0.624105			0.3836	0.25334	0.3836	0.203845			0.3836	0.0699926	0.3836	0.268155
				0.3838	1.52798	0.3838	1.32787			0.3838	1.13349	0.3838	0.624392			0.3838	0.253435	0.3838	0.203976			0.3838	0.0700358	0.3838	0.268233
				0.384	1.52787	0.384	1.32792			0.384	1.13386	0.384	0.624679			0.384	0.253529	0.384	0.204108			0.384	0.0700791	0.384	0.268311
				0.3842	1.52776	0.3842	1.32796			0.3842	1.13423	0.3842	0.624966			0.3842	0.253623	0.3842	0.204239			0.3842	0.0701223	0.3842	0.268389
				0.3844	1.52765	0.3844	1.32801			0.3844	1.13459	0.3844	0.625253			0.3844	0.253718	0.3844	0.20437			0.3844	0.0701656	0.3844	0.268467
				0.3846	1.52754	0.3846	1.32806			0.3846	1.13496	0.3846	0.62554			0.3846	0.253812	0.3846	0.204501			0.3846	0.070209	0.3846	0.268545
				0.3848	1.52743	0.3848	1.3281			0.3848	1.13533	0.3848	0.625827			0.3848	0.253906	0.3848	0.204633			0.3848	0.0702523	0.3848	0.268624
				0.385	1.52732	0.385	1.32815			0.385	1.13569	0.385	0.626113			0.385	0.254001	0.385	0.204764			0.385	0.0702957	0.385	0.268702
				0.3852	1.5272	0.3852	1.32819			0.3852	1.13606	0.3852	0.6264			0.3852	0.254095	0.3852	0.204896			0.3852	0.0703391	0.3852	0.26878
				0.3854	1.52709	0.3854	1.32823			0.3854	1.13643	0.3854	0.626687			0.3854	0.25419	0.3854	0.205027			0.3854	0.0703825	0.3854	0.268858
				0.3856	1.52697	0.3856	1.32828			0.3856	1.13679	0.3856	0.626974			0.3856	0.254284	0.3856	0.205159			0.3856	0.0704259	0.3856	0.268936
				0.3858	1.52686	0.3858	1.32832			0.3858	1.13716	0.3858	0.62726			0.3858	0.254379	0.3858	0.205291			0.3858	0.0704694	0.3858	0.269014
				0.386	1.52674	0.386	1.32836			0.386	1.13752	0.386	0.627547			0.386	0.254473	0.386	0.205422			0.386	0.0705128	0.386	0.269093
				0.3862	1.52662	0.3862	1.3284			0.3862	1.13789	0.3862	0.627834			0.3862	0.254568	0.3862	0.205554			0.3862	0.0705563	0.3862	0.269171
				0.3864	1.5265	0.3864	1.32844			0.3864	1.13825	0.3864	0.628121			0.3864	0.254662	0.3864	0.205686			0.3864	0.0705998	0.3864	0.269249
				0.3866	1.52638	0.3866	1.32848			0.3866	1.13861	0.3866	0.628407			0.3866	0.254757	0.3866	0.205818			0.3866	0.0706434	0.3866	0.269327
				0.3868	1.52626	0.3868	1.32852			0.3868	1.13898	0.3868	0.628694			0.3868	0.254851	0.3868	0.20595			0.3868	0.0706869	0.3868	0.269406
				0.387	1.52614	0.387	1.32856			0.387	1.13934	0.387	0.62898			0.387	0.254946	0.387	0.206082			0.387	0.0707305	0.387	0.269484
				0.3872	1.52602	0.3872	1.3286			0.3872	1.1397	0.3872	0.629267			0.3872	0.25504	0.3872	0.206214			0.3872	0.0707741	0.3872	0.269562
				0.3874	1.5259	0.3874	1.32864			0.3874	1.14007	0.3874	0.629554			0.3874	0.255135	0.3874	0.206346			0.3874	0.0708177	0.3874	0.26964
				0.3876	1.52577	0.3876	1.32867			0.3876	1.14043	0.3876	0.62984			0.3876	0.25523	0.3876	0.206478			0.3876	0.0708613	0.3876	0.269718
				0.3878	1.52565	0.3878	1.32871			0.3878	1.14079	0.3878	0.630127			0.3878	0.255324	0.3878	0.20661			0.3878	0.070905	0.3878	0.269797
				0.388	1.52552	0.388	1.32874			0.388	1.14115	0.388	0.630413			0.388	0.255419	0.388	0.206742			0.388	0.0709486	0.388	0.269875
				0.3882	1.52539	0.3882	1.32878			0.3882	1.14151	0.3882	0.6307			0.3882	0.255514	0.3882	0.206875			0.3882	0.0709923	0.3882	0.269953
				0.3884	1.52527	0.3884	1.32881			0.3884	1.14187	0.3884	0.630986			0.3884	0.255608	0.3884	0.207007			0.3884	0.0710361	0.3884	0.270031
				0.3886	1.52514	0.3886	1.32885			0.3886	1.14223	0.3886	0.631273			0.3886	0.255703	0.3886	0.207139			0.3886	0.0710798	0.3886	0.27011
				0.3888	1.52501	0.3888	1.32888			0.3888	1.14259	0.3888	0.631559			0.3888	0.255798	0.3888	0.207272			0.3888	0.0711236	0.3888	0.270188
				0.389	1.52488	0.389	1.32891			0.389	1.14295	0.389	0.631846			0.389	0.255892	0.389	0.207404			0.389	0.0711673	0.389	0.270266
				0.3892	1.52475	0.3892	1.32895			0.3892	1.14331	0.3892	0.632132			0.3892	0.255987	0.3892	0.207537			0.3892	0.0712111	0.3892	0.270344
				0.3894	1.52462	0.3894	1.32898			0.3894	1.14367	0.3894	0.632418			0.3894	0.256082	0.3894	0.207669			0.3894	0.0712549	0.3894	0.270423
				0.3896	1.52448	0.3896	1.32901			0.3896	1.14403	0.3896	0.632705			0.3896	0.256176	0.3896	0.207802			0.3896	0.0712988	0.3896	0.270501
				0.3898	1.52435	0.3898	1.32904			0.3898	1.14438	0.3898	0.632991			0.3898	0.256271	0.3898	0.207935			0.3898	0.0713426	0.3898	0.270579
				0.39	1.52421	0.39	1.32907			0.39	1.14474	0.39	0.633277			0.39	0.256366	0.39	0.208068			0.39	0.0713865	0.39	0.270658
				0.3902	1.52408	0.3902	1.3291			0.3902	1.1451	0.3902	0.633564			0.3902	0.256461	0.3902	0.2082			0.3902	0.0714304	0.3902	0.270736
				0.3904	1.52394	0.3904	1.32913			0.3904	1.14546	0.3904	0.63385			0.3904	0.256556	0.3904	0.208333			0.3904	0.0714744	0.3904	0.270814
				0.3906	1.5238	0.3906	1.32915			0.3906	1.14581	0.3906	0.634136			0.3906	0.25665	0.3906	0.208466			0.3906	0.0715183	0.3906	0.270893
				0.3908	1.52366	0.3908	1.32918			0.3908	1.14617	0.3908	0.634423			0.3908	0.256745	0.3908	0.208599			0.3908	0.0715623	0.3908	0.270971
				0.391	1.52353	0.391	1.32921			0.391	1.14652	0.391	0.634709			0.391	0.25684	0.391	0.208732			0.391	0.0716062	0.391	0.271049
				0.3912	1.52339	0.3912	1.32924			0.3912	1.14688	0.3912	0.634995			0.3912	0.256935	0.3912	0.208865			0.3912	0.0716502	0.3912	0.271128
				0.3914	1.52324	0.3914	1.32926			0.3914	1.14723	0.3914	0.635281			0.3914	0.25703	0.3914	0.208998			0.3914	0.0716943	0.3914	0.271206
				0.3916	1.5231	0.3916	1.32929			0.3916	1.14759	0.3916	0.635567			0.3916	0.257125	0.3916	0.209132			0.3916	0.0717383	0.3916	0.271284
				0.3918	1.52296	0.3918	1.32931			0.3918	1.14794	0.3918	0.635853			0.3918	0.257219	0.3918	0.209265			0.3918	0.0717824	0.3918	0.271363
				0.392	1.52282	0.392	1.32933			0.392	1.1483	0.392	0.636139			0.392	0.257314	0.392	0.209398			0.392	0.0718265	0.392	0.271441
				0.3922	1.52267	0.3922	1.32936			0.3922	1.14865	0.3922	0.636426			0.3922	0.257409	0.3922	0.209531			0.3922	0.0718706	0.3922	0.271519
				0.3924	1.52253	0.3924	1.32938			0.3924	1.149	0.3924	0.636712			0.3924	0.257504	0.3924	0.209665			0.3924	0.0719147	0.3924	0.271598
				0.3926	1.52238	0.3926	1.3294			0.3926	1.14936	0.3926	0.636998			0.3926	0.257599	0.3926	0.209798			0.3926	0.0719589	0.3926	0.271676
				0.3928	1.52223	0.3928	1.32942			0.3928	1.14971	0.3928	0.637284			0.3928	0.257694	0.3928	0.209932			0.3928	0.072003	0.3928	0.271754
				0.393	1.52208	0.393	1.32945			0.393	1.15006	0.393	0.63757			0.393	0.257789	0.393	0.210065			0.393	0.0720472	0.393	0.271833
				0.3932	1.52193	0.3932	1.32947			0.3932	1.15041	0.3932	0.637856			0.3932	0.257884	0.3932	0.210199			0.3932	0.0720914	0.3932	0.271911
				0.3934	1.52178	0.3934	1.32949			0.3934	1.15076	0.3934	0.638142			0.3934	0.257979	0.3934	0.210333			0.3934	0.0721357	0.3934	0.271989
				0.3936	1.52163	0.3936	1.32951			0.3936	1.15111	0.3936	0.638427			0.3936	0.258074	0.3936	0.210466			0.3936	0.0721799	0.3936	0.272068
				0.3938	1.52148	0.3938	1.32952			0.3938	1.15147	0.3938	0.638713			0.3938	0.258169	0.3938	0.2106			0.3938	0.0722242	0.3938	0.272146
				0.394	1.52133	0.394	1.32954			0.394	1.15182	0.394	0.638999			0.394	0.258264	0.394	0.210734			0.394	0.0722685	0.394	0.272225
				0.3942	1.52118	0.3942	1.32956			0.3942	1.15217	0.3942	0.639285			0.3942	0.258359	0.3942	0.210868			0.3942	0.0723128	0.3942	0.272303
				0.3944	1.52102	0.3944	1.32958			0.3944	1.15251	0.3944	0.639571			0.3944	0.258454	0.3944	0.211002			0.3944	0.0723571	0.3944	0.272381
				0.3946	1.52087	0.3946	1.32959			0.3946	1.15286	0.3946	0.639857			0.3946	0.258549	0.3946	0.211136			0.3946	0.0724015	0.3946	0.27246
				0.3948	1.52071	0.3948	1.32961			0.3948	1.15321	0.3948	0.640142			0.3948	0.258644	0.3948	0.21127			0.3948	0.0724459	0.3948	0.272538
				0.395	1.52055	0.395	1.32962			0.395	1.15356	0.395	0.640428			0.395	0.258739	0.395	0.211404			0.395	0.0724903	0.395	0.272617
				0.3952	1.5204	0.3952	1.32964			0.3952	1.15391	0.3952	0.640714			0.3952	0.258835	0.3952	0.211538			0.3952	0.0725347	0.3952	0.272695
				0.3954	1.52024	0.3954	1.32965			0.3954	1.15426	0.3954	0.641			0.3954	0.25893	0.3954	0.211672			0.3954	0.0725791	0.3954	0.272773
				0.3956	1.52008	0.3956	1.32966			0.3956	1.1546	0.3956	0.641285			0.3956	0.259025	0.3956	0.211806			0.3956	0.0726236	0.3956	0.272852
				0.3958	1.51992	0.3958	1.32968			0.3958	1.15495	0.3958	0.641571			0.3958	0.25912	0.3958	0.211941			0.3958	0.0726681	0.3958	0.27293
				0.396	1.51976	0.396	1.32969			0.396	1.1553	0.396	0.641857			0.396	0.259215	0.396	0.212075			0.396	0.0727126	0.396	0.273009
				0.3962	1.51959	0.3962	1.3297			0.3962	1.15564	0.3962	0.642142			0.3962	0.25931	0.3962	0.212209			0.3962	0.0727571	0.3962	0.273087
				0.3964	1.51943	0.3964	1.32971			0.3964	1.15599	0.3964	0.642428			0.3964	0.259405	0.3964	0.212344			0.3964	0.0728016	0.3964	0.273166
				0.3966	1.51927	0.3966	1.32972			0.3966	1.15633	0.3966	0.642713			0.3966	0.259501	0.3966	0.212478			0.3966	0.0728462	0.3966	0.273244
				0.3968	1.5191	0.3968	1.32973			0.3968	1.15668	0.3968	0.642999			0.3968	0.259596	0.3968	0.212613			0.3968	0.0728908	0.3968	0.273322
				0.397	1.51893	0.397	1.32974			0.397	1.15702	0.397	0.643284			0.397	0.259691	0.397	0.212748			0.397	0.0729354	0.397	0.273401
				0.3972	1.51877	0.3972	1.32975			0.3972	1.15737	0.3972	0.64357			0.3972	0.259786	0.3972	0.212882			0.3972	0.07298	0.3972	0.273479
				0.3974	1.5186	0.3974	1.32976			0.3974	1.15771	0.3974	0.643855			0.3974	0.259882	0.3974	0.213017			0.3974	0.0730247	0.3974	0.273558
				0.3976	1.51843	0.3976	1.32977			0.3976	1.15805	0.3976	0.644141			0.3976	0.259977	0.3976	0.213152			0.3976	0.0730693	0.3976	0.273636
				0.3978	1.51826	0.3978	1.32977			0.3978	1.1584	0.3978	0.644426			0.3978	0.260072	0.3978	0.213287			0.3978	0.073114	0.3978	0.273715
				0.398	1.51809	0.398	1.32978			0.398	1.15874	0.398	0.644711			0.398	0.260167	0.398	0.213421			0.398	0.0731587	0.398	0.273793
				0.3982	1.51792	0.3982	1.32978			0.3982	1.15908	0.3982	0.644997			0.3982	0.260263	0.3982	0.213556			0.3982	0.0732035	0.3982	0.273872
				0.3984	1.51775	0.3984	1.32979			0.3984	1.15942	0.3984	0.645282			0.3984	0.260358	0.3984	0.213691			0.3984	0.0732482	0.3984	0.27395
				0.3986	1.51758	0.3986	1.32979			0.3986	1.15977	0.3986	0.645567			0.3986	0.260453	0.3986	0.213826			0.3986	0.073293	0.3986	0.274029
				0.3988	1.5174	0.3988	1.3298			0.3988	1.16011	0.3988	0.645853			0.3988	0.260549	0.3988	0.213961			0.3988	0.0733378	0.3988	0.274107
				0.399	1.51723	0.399	1.3298			0.399	1.16045	0.399	0.646138			0.399	0.260644	0.399	0.214097			0.399	0.0733826	0.399	0.274186
				0.3992	1.51705	0.3992	1.3298			0.3992	1.16079	0.3992	0.646423			0.3992	0.26074	0.3992	0.214232			0.3992	0.0734274	0.3992	0.274264
				0.3994	1.51688	0.3994	1.3298			0.3994	1.16113	0.3994	0.646708			0.3994	0.260835	0.3994	0.214367			0.3994	0.0734723	0.3994	0.274343
[truncated: 19,551 more rows]
